# Supplementary material for: Synthesis, characterization, photophysics, and anion binding properties of platinum(ii) acetylide complexes with urea group
Source: Royal Society of Chemistry journal article supplement (doi:10.1039/c5dt00307e), 2015-01-01
Supplement: c5dt00307e1.pdf [file c5dt00307e1.pdf]

# Supplementary Information

## **Synthesis, Characterization, Photophysics, and Anion Binding Properties of Platinum(II) Acetylide Complexes with Urea Group**

Zhi-Hui Zhang, Jiewei Liu, Li-Qi Wan, Fang-Ru Jiang, Chi-Keung Lam, Bao-Hui Ye, Zhengping Qiao, and Hsiu-Yi Chao\*

*MOE Key Laboratory of Bioinorganic and Synthetic Chemistry, School of Chemistry and Chemical Engineering, Sun Yat-Sen University, Guangzhou 510275, P. R. China*

*E-mail: zhaoxy@mail.sysu.edu.cn; Fax: +86-20-84112245; Tel: +86-20-84110062.*

**Table S1.** Crystallographic data of **3a**, **3a DMF THF**, **3b CH<sub>3</sub>CN**, and **3c CH<sub>3</sub>CN**

|                                                       | <b>3a</b>                                                                        | <b>3a DMF THF</b>                                                                | <b>3b CH<sub>3</sub>CN</b>                                                         | <b>3c CH<sub>3</sub>CN</b>                                                       |
|-------------------------------------------------------|----------------------------------------------------------------------------------|----------------------------------------------------------------------------------|------------------------------------------------------------------------------------|----------------------------------------------------------------------------------|
| Formula                                               | C <sub>43</sub> H <sub>46</sub> F <sub>3</sub> N <sub>5</sub> O <sub>4</sub> PtS | C <sub>50</sub> H <sub>46</sub> F <sub>3</sub> N <sub>6</sub> O <sub>6</sub> PtS | C <sub>45</sub> H <sub>45</sub> ClF <sub>3</sub> N <sub>6</sub> O <sub>4</sub> PtS | C <sub>46</sub> H <sub>48</sub> F <sub>6</sub> N <sub>6</sub> O <sub>4</sub> PtS |
| Formula weight                                        | 981.01                                                                           | 1111.10                                                                          | 1053.49                                                                            | 1090.05                                                                          |
| Temperature/K                                         | 150.0                                                                            | 298.0                                                                            | 150.0                                                                              | 173.0                                                                            |
| Crystal system                                        | triclinic                                                                        | monoclinic                                                                       | monoclinic                                                                         | monoclinic                                                                       |
| Space group                                           | P-1                                                                              | P2 <sub>1</sub> /n                                                               | P2 <sub>1</sub> /n                                                                 | P2 <sub>1</sub> /n                                                               |
| a/Å                                                   | 9.3035(4)                                                                        | 12.1155(3)                                                                       | 14.3112(8)                                                                         | 14.39500(10)                                                                     |
| b/Å                                                   | 12.0230(5)                                                                       | 29.9363(5)                                                                       | 14.7141(7)                                                                         | 14.86570(10)                                                                     |
| c/Å                                                   | 20.6666(5)                                                                       | 15.1278(4)                                                                       | 20.9907(8)                                                                         | 21.4413(2)                                                                       |
| α/°                                                   | 88.269(3)                                                                        | 90.00                                                                            | 90.00                                                                              | 90.00                                                                            |
| β/°                                                   | 87.144(2)                                                                        | 112.253(3)                                                                       | 95.457(1)                                                                          | 95.4310(10)                                                                      |
| γ/°                                                   | 79.980(3)                                                                        | 90.00                                                                            | 90.00                                                                              | 90.00                                                                            |
| V/Å <sup>3</sup>                                      | 2273.04(14)                                                                      | 5078.1(2)                                                                        | 4400.1(4)                                                                          | 4567.66(6)                                                                       |
| Z                                                     | 2                                                                                | 4                                                                                | 4                                                                                  | 4                                                                                |
| ρ <sub>calc</sub> (mg/mm <sup>3</sup> )               | 1.4332                                                                           | 1.4532                                                                           | 1.5902                                                                             | 1.585                                                                            |
| Refns collected                                       | 21510                                                                            | 27099                                                                            | 30853                                                                              | 23402                                                                            |
| Indep reflns                                          | 9422                                                                             | 7758                                                                             | 9644                                                                               | 7249                                                                             |
| R <sub>int</sub>                                      | 0.0505                                                                           | 0.0659                                                                           | 0.0607                                                                             | 0.0357                                                                           |
| GOF                                                   | 1.193                                                                            | 1.146                                                                            | 1.026                                                                              | 1.026                                                                            |
| R, <sup>a</sup> R <sub>w</sub> <sup>b</sup> [≥2σ (I)] | 0.0576, 0.1619                                                                   | 0.0559, 0.1447                                                                   | 0.0474, 0.1412                                                                     | 0.0329, 0.0816                                                                   |

$${}^a R = \Sigma(|F_o| - |F_c|) / \Sigma|F_o|. \quad {}^b R_w = [\Sigma w(|F_o| - |F_c|)^2 / \Sigma w|F_o|^2]^{1/2}$$

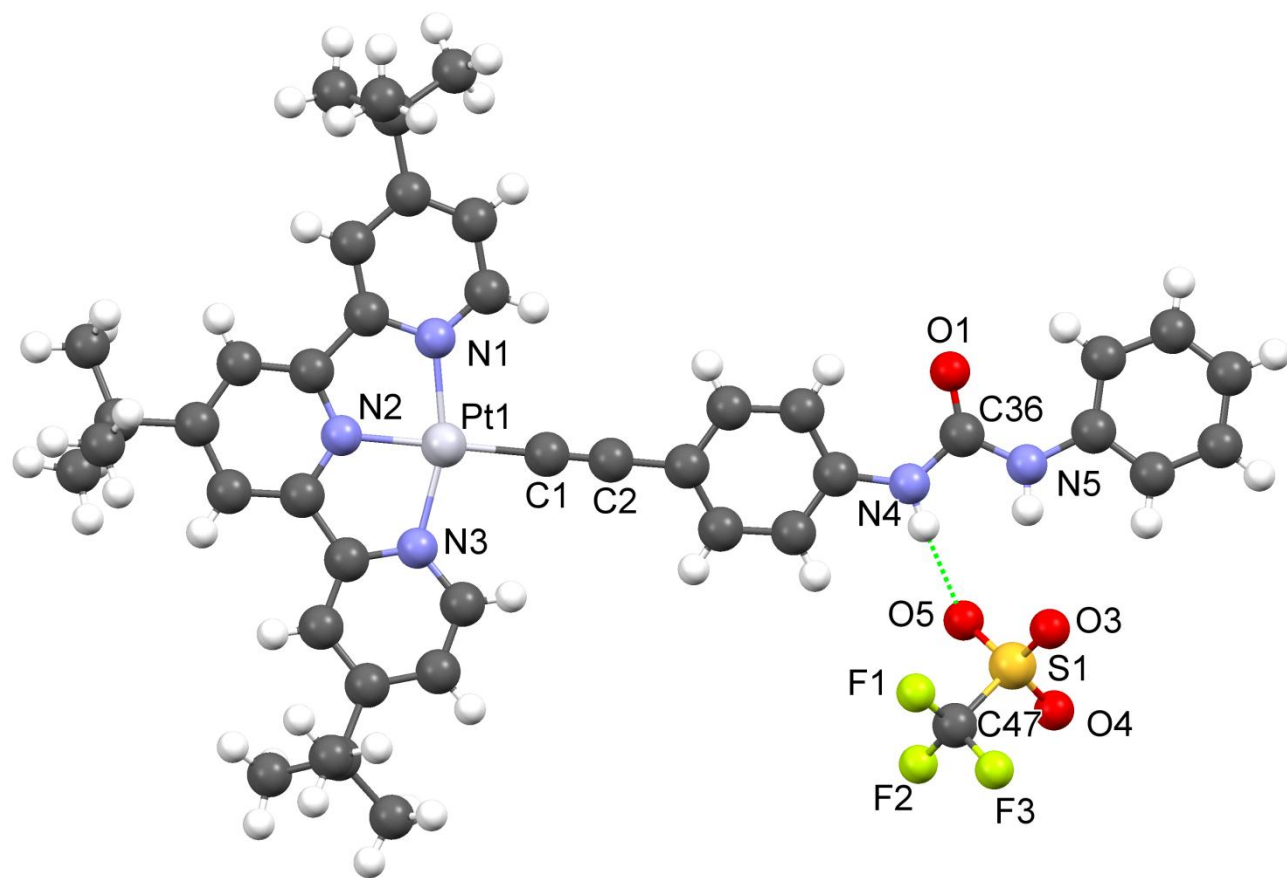

**Figure S1.** Perspective view of **3a DMF·THF**. Solvent molecules have been omitted for clarity.

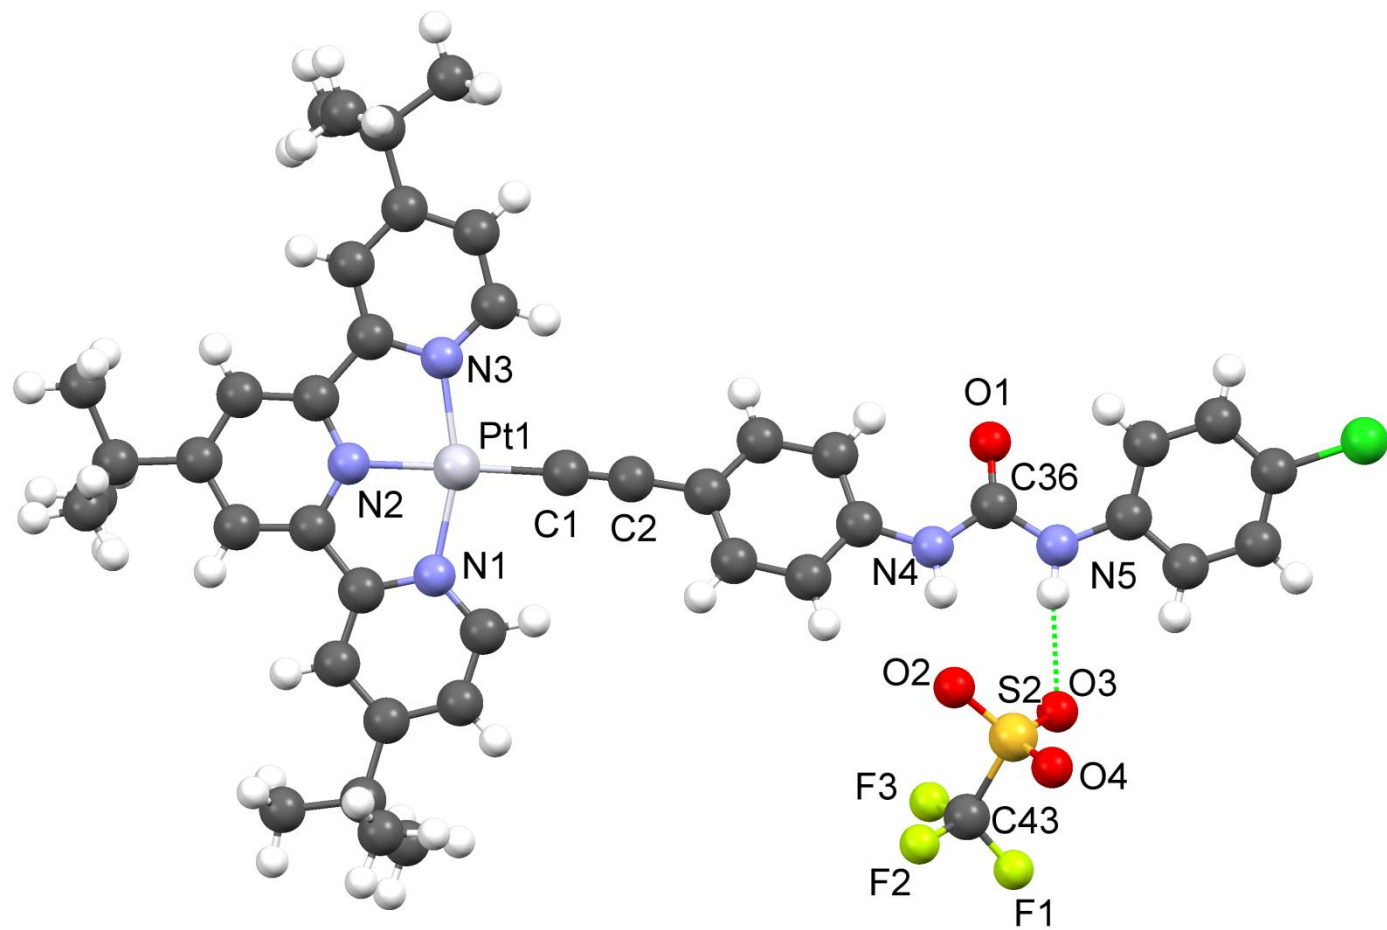

**Figure S2.** Perspective view of **3b**  $\text{CH}_3\text{CN}$ . Solvent molecules have been omitted for clarity.

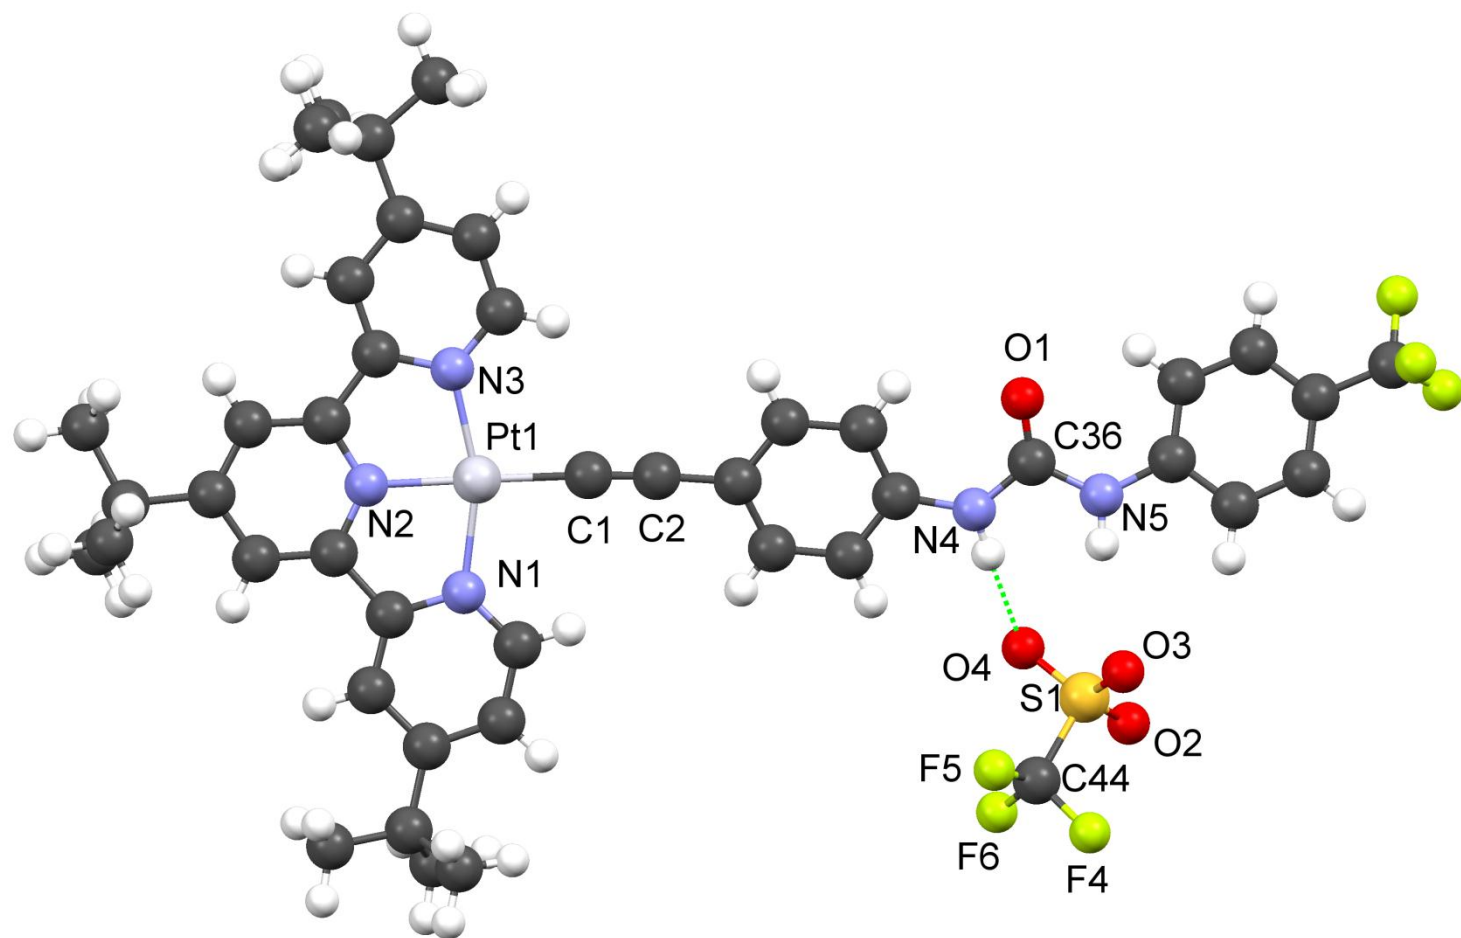

**Figure S3.** Perspective view of **3c**  $\text{CH}_3\text{CN}$ . Solvent molecules have been omitted for clarity.

**Table S2.** Hydrogen bond parameters (N–H···O) of **3a**, **3a** DMF·THF, **3b** CH<sub>3</sub>CN and **3c** CH<sub>3</sub>CN (Å and °)

| complex                      | D–H···A                        | d(D–H) | d(H···A) | d(D···A) | ∠(DHA) |
|------------------------------|--------------------------------|--------|----------|----------|--------|
| <b>3a</b>                    | N(4)–H(7)···O(3) <sup>a</sup>  | 0.880  | 2.192    | 3.062    | 169.84 |
| <b>3a</b> DMF·THF            | N(4)–H(30)···O(5) <sup>b</sup> | 0.860  | 2.111    | 2.953    | 166.30 |
| <b>3b</b> CH <sub>3</sub> CN | N(4)–H(37)···O(2) <sup>b</sup> | 0.880  | 2.022    | 2.887    | 166.81 |
| <b>3c</b> CH <sub>3</sub> CN | N(4)–H(1A)···O(4) <sup>b</sup> | 0.880  | 2.065    | 2.927    | 169.61 |

<sup>a</sup>Symmetry transformations used to generate equivalent atoms:  $-x, -y, -z$ .

<sup>b</sup>Symmetry transformations used to generate equivalent atoms:  $1/2-x, 1/2+y, 1/2-z$ .

**Table S3.** Photophysical data of ligands **1a–1d** at 298 K

| compound  | medium             | $\lambda_{\text{abs}}/\text{nm}$ ( $\epsilon/\text{dm}^3 \cdot \text{mol}^{-1} \cdot \text{cm}^{-1}$ ) | $\lambda_{\text{em}}/\text{nm}$ |
|-----------|--------------------|--------------------------------------------------------------------------------------------------------|---------------------------------|
| <b>1a</b> | CH <sub>3</sub> CN | 274 (50300)                                                                                            | 318, 398                        |
| <b>1b</b> | CH <sub>3</sub> CN | 275 (53860)                                                                                            | 316, 406                        |
| <b>1c</b> | CH <sub>3</sub> CN | 276 (67440)                                                                                            | 314, 413                        |
| <b>1d</b> | CH <sub>3</sub> CN | 263 (29160), 333 (28000)                                                                               | Non-emissive                    |

**Table S4.** The low-energy absorption maximum (nm) of **3a** and **3b** in various solvents at 298 K and the corresponding dielectric constant of the solvents

|                     | CH <sub>2</sub> Cl <sub>2</sub> | THF | CH <sub>3</sub> C(O)CH <sub>3</sub> | DMSO | CH <sub>3</sub> CN | CH <sub>3</sub> OH |
|---------------------|---------------------------------|-----|-------------------------------------|------|--------------------|--------------------|
| <b>3a</b>           | 498                             | 492 | 476                                 | 472  | 464                | 458                |
| <b>3b</b>           | 502                             | 493 | -                                   | 469  | 460                | 453                |
| dielectric constant | 8.9                             | 7.6 | 20.7                                | 46.7 | 37.5               | 24.5               |

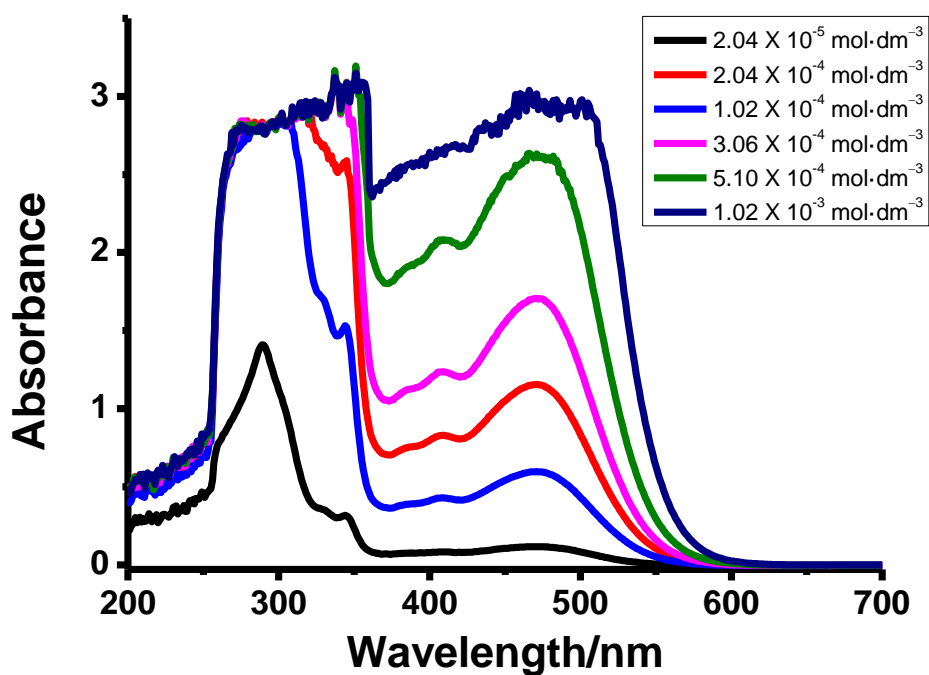

**Figure S4.** The electronic absorption spectral changes of **3a** as the concentration increase from  $1 \times 10^{-5}$  to  $1 \times 10^{-3} \text{ mol}\cdot\text{dm}^{-3}$  at 298 K.

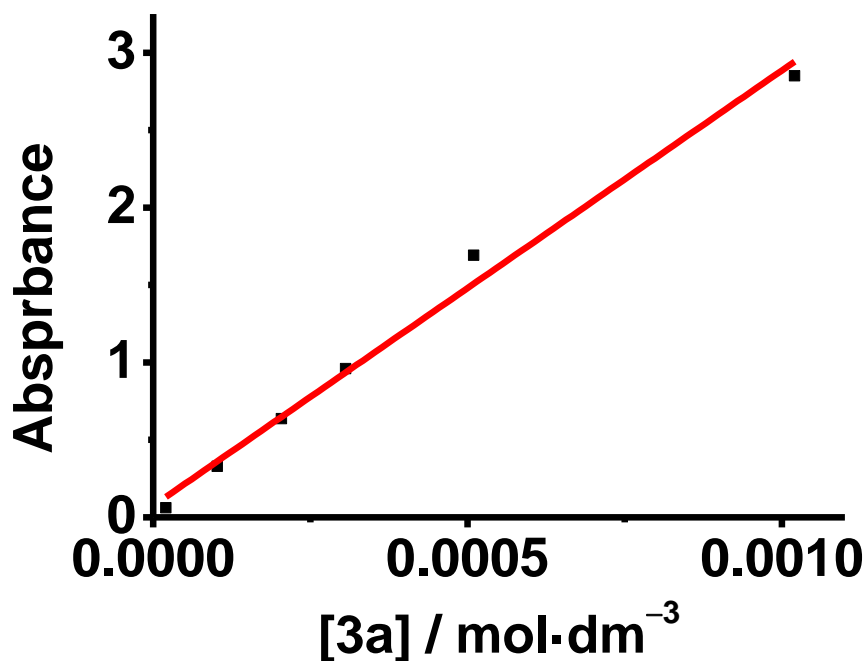

**Figure S5.** Plot of the absorbance at 510 nm as a function of concentration.

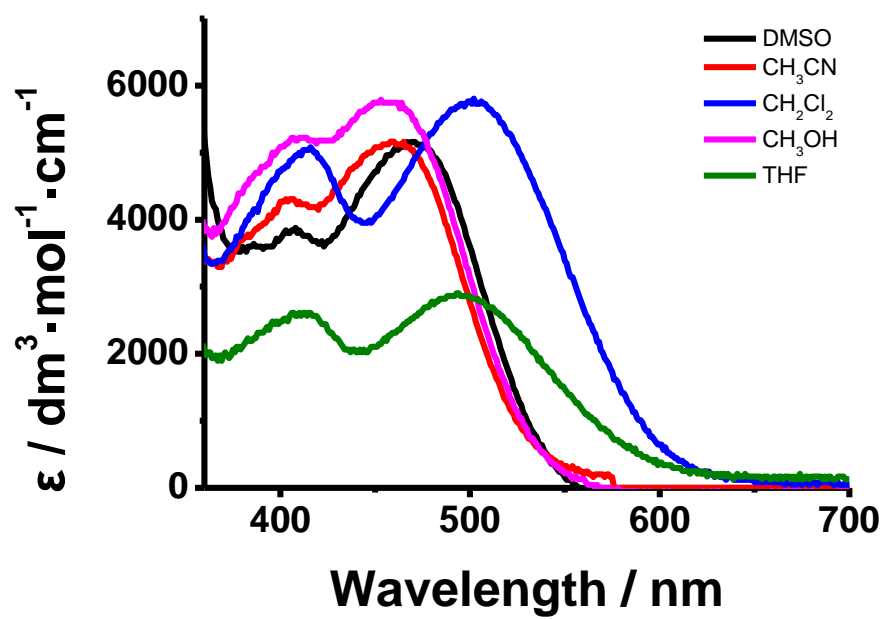

**Figure S6.** Electronic absorption spectrum of **3b** in various solutions at 298 K at 360-700 nm



(a)

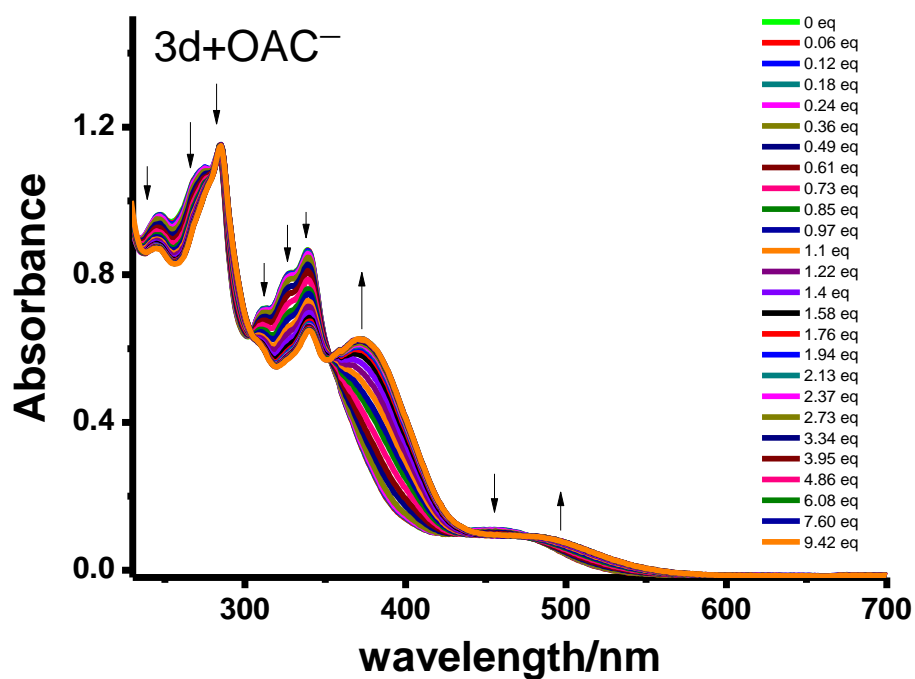

(b)

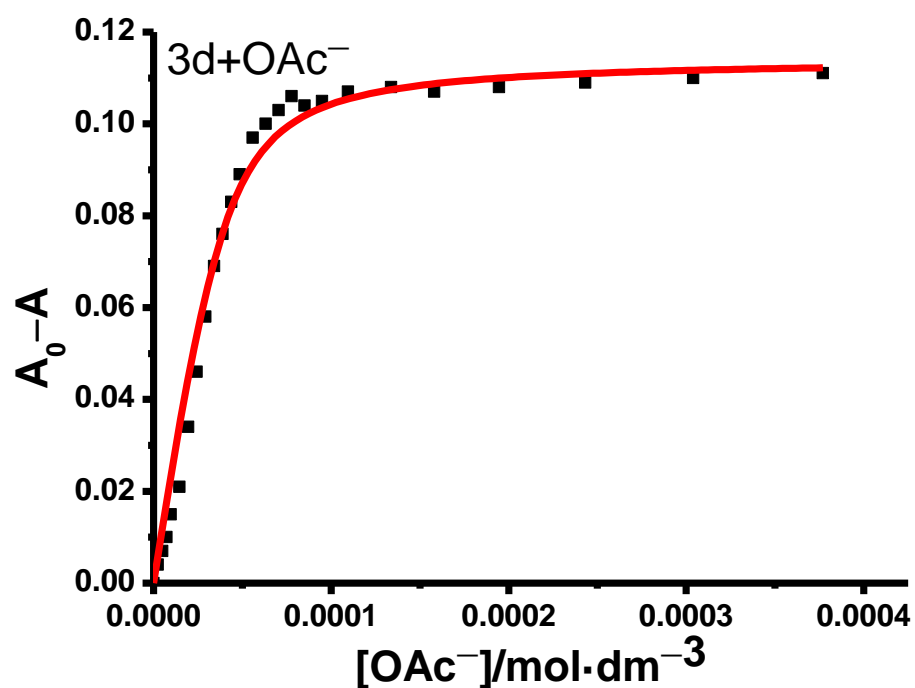

**Figure S7.** (a) UV-vis spectral changes of **3d** (4 × 10<sup>-5</sup> mol·dm<sup>-3</sup>) in CH<sub>3</sub>CN upon addition of OAc<sup>-</sup>. (b) A plot of the absorbance change at 254 nm as a function of the concentration of OAc<sup>-</sup> and its theoretical fit for the 1:1 binding of complex **3d** with OAc<sup>-</sup>.

(a)

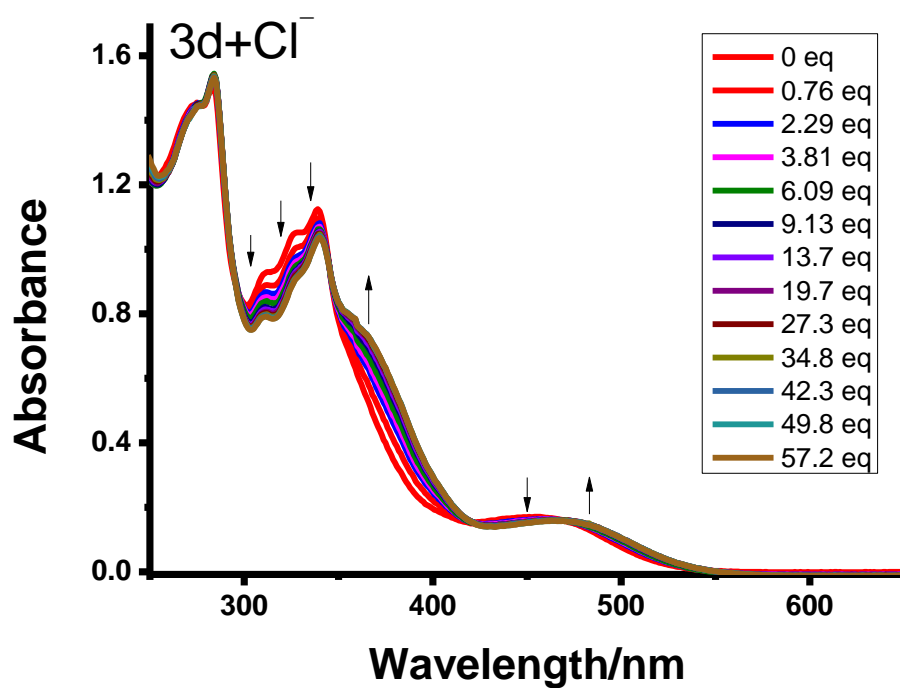

(b)

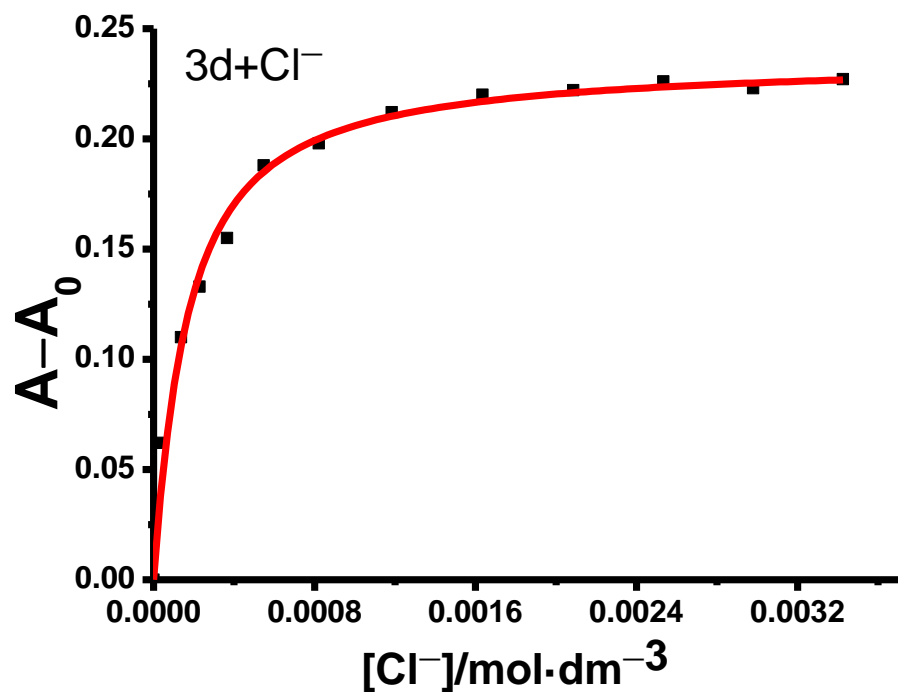

**Figure S8.** (a) UV-vis spectral changes of **3d** ( $4 \times 10^{-5} \text{ mol}\cdot\text{dm}^{-3}$ ) in  $\text{CH}_3\text{CN}$  upon addition of  $\text{Cl}^-$ . (b) A plot of the absorbance change at 370 nm as a function of the concentration of  $\text{Cl}^-$  and its theoretical fit for the 1:1 binding of complex **3d** with  $\text{Cl}^-$ .

(a)

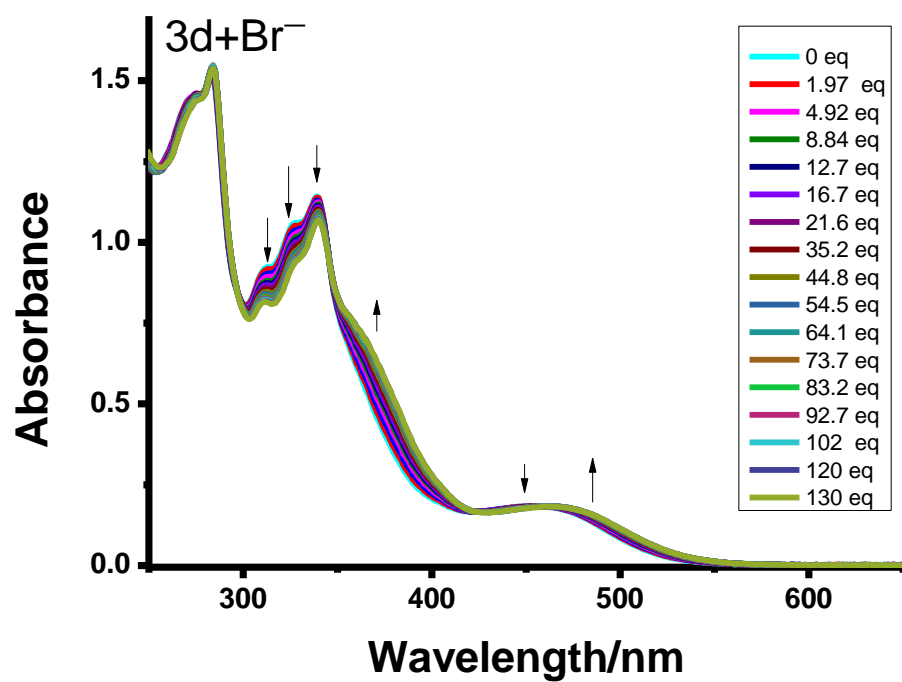

(b)

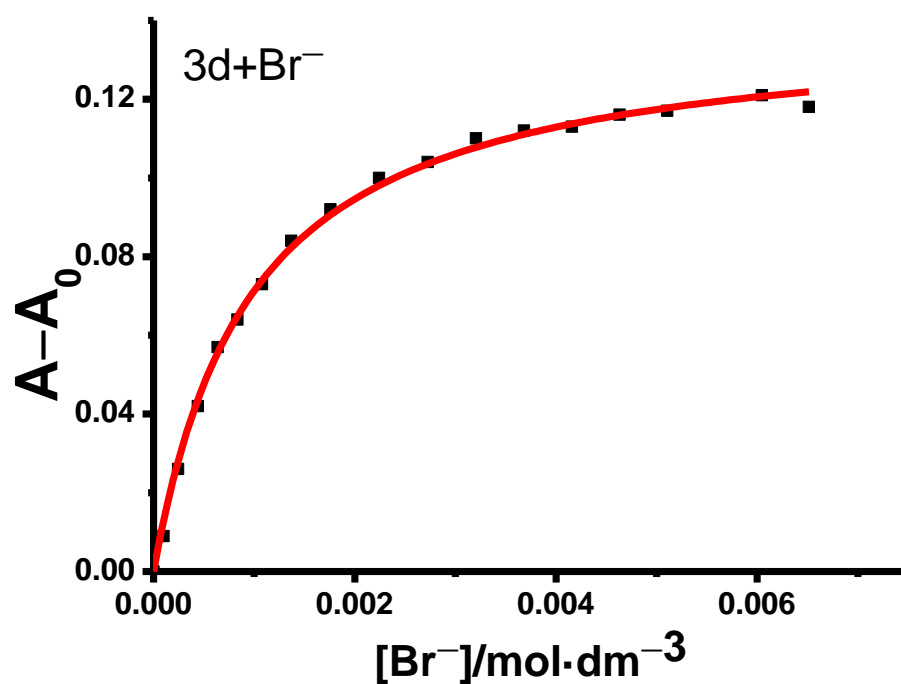

**Figure S9.** (a) UV-vis spectral changes of **3d** ( $5 \times 10^{-5} \text{ mol}\cdot\text{dm}^{-3}$ ) in  $\text{CH}_3\text{CN}$  upon addition of  $\text{Br}^-$ . (b) A plot of the absorbance change at 360 nm as a function of the concentration of  $\text{Br}^-$  and its theoretical fit for the 1:1 binding of complex **3d** with  $\text{Br}^-$ .

(a)

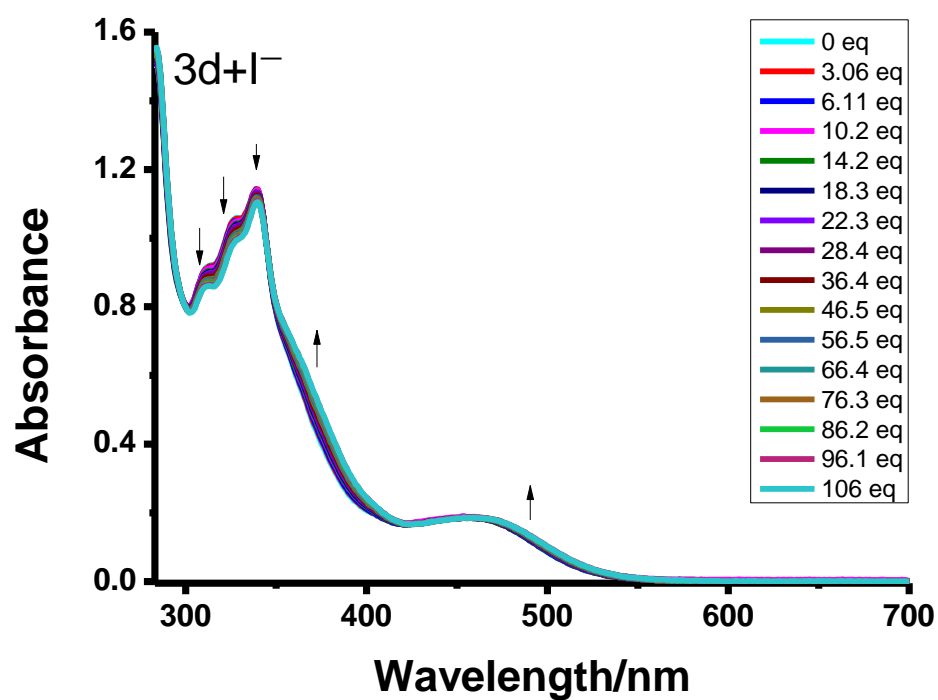

(b)

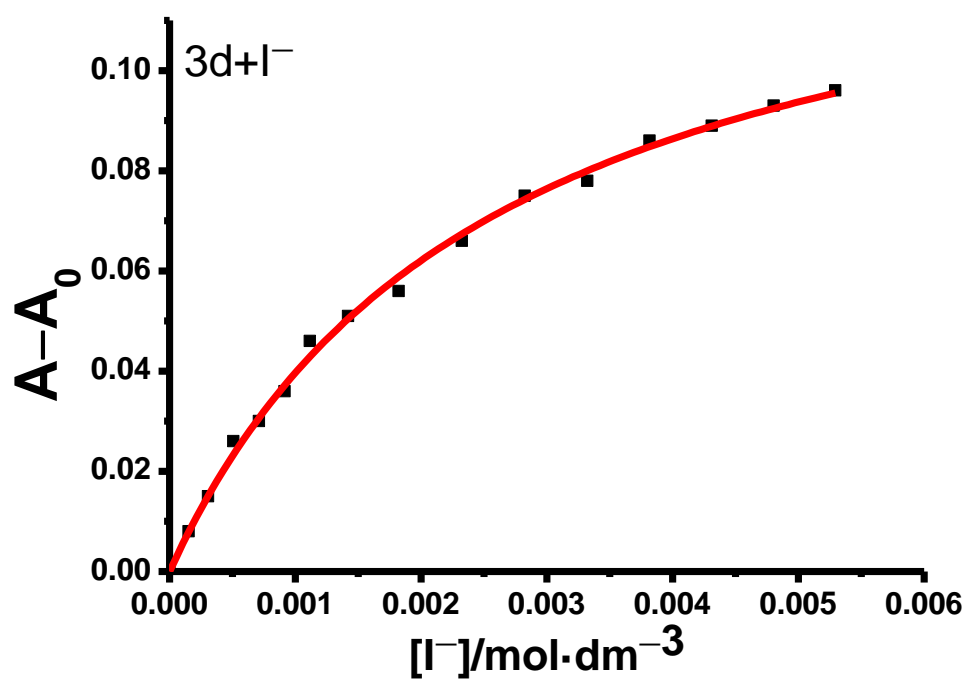

**Figure S10.** (a) UV-vis spectral changes of **3d** ( $5 \times 10^{-5} \text{ mol}\cdot\text{dm}^{-3}$ ) in  $\text{CH}_3\text{CN}$  upon addition of  $\text{I}^-$ . (b) A plot of the absorbance change at 370 nm as a function of the concentration of  $\text{I}^-$  and its theoretical fit for the 1:1 binding of complex **3d** with  $\text{I}^-$ .

(a)

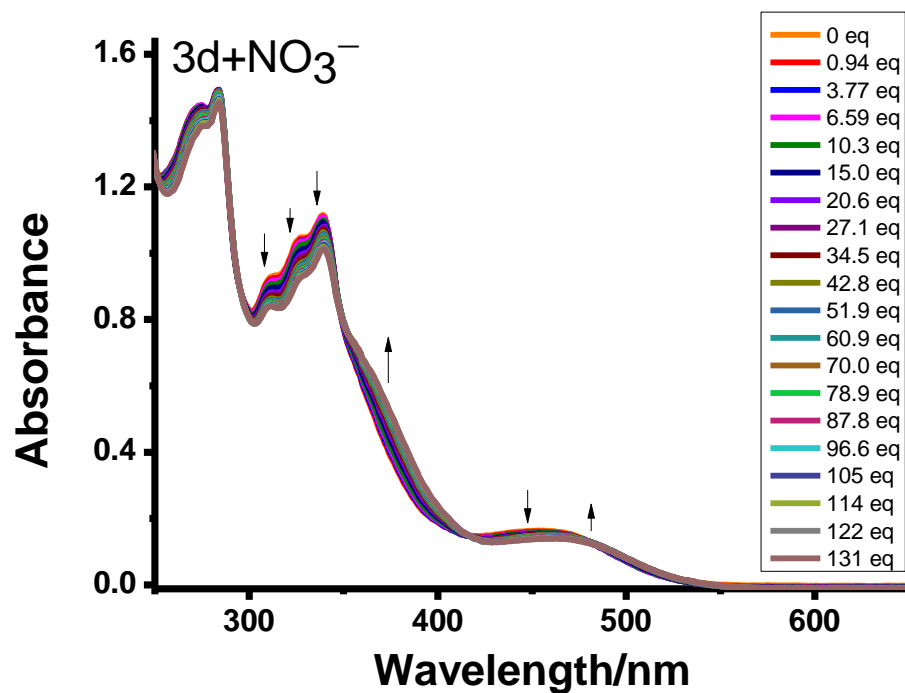

(b)

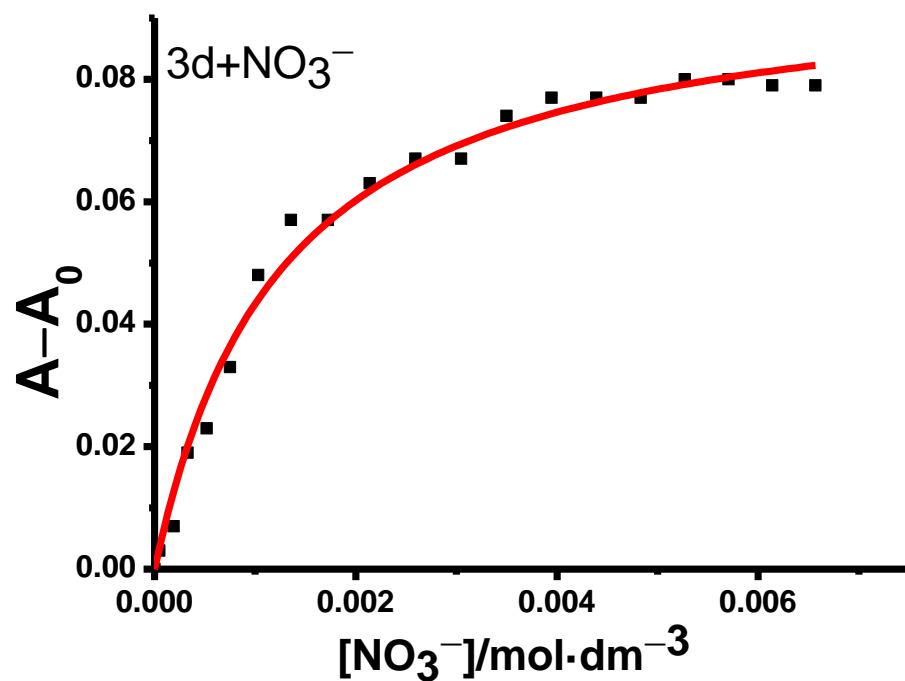

**Figure S11.** (a) UV-vis spectral changes of **3d** ( $5 \times 10^{-5} \text{ mol}\cdot\text{dm}^{-3}$ ) in  $\text{CH}_3\text{CN}$  upon addition of  $\text{NO}_3^-$ . (b) A plot of the absorbance change at 360 nm as a function of the concentration of  $\text{NO}_3^-$  and its theoretical fit for the 1:1 binding of complex **3d** with  $\text{NO}_3^-$ .

(a)

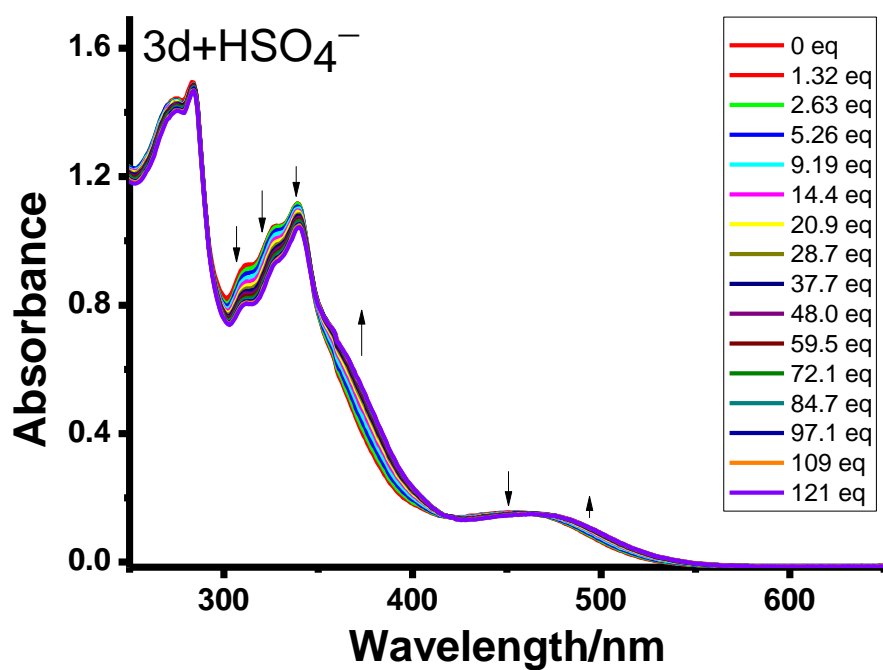

(b)

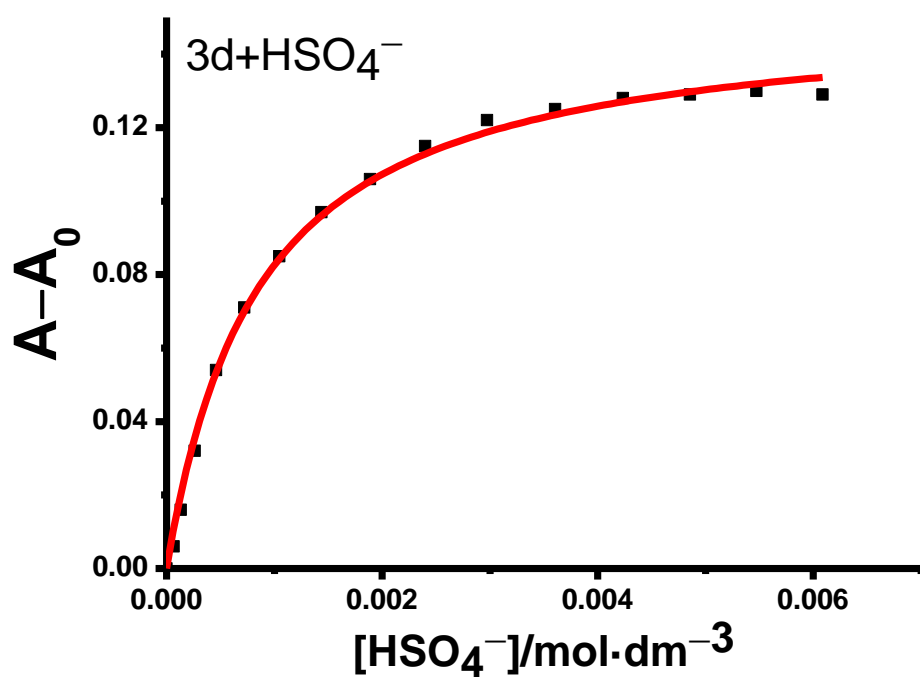

**Figure S12.** (a) UV-vis spectral changes of **3d** ( $5 \times 10^{-5} \text{ mol}\cdot\text{dm}^{-3}$ ) in  $\text{CH}_3\text{CN}$  upon addition of  $\text{HSO}_4^-$ . (b) A plot of the absorbance change at 368 nm as a function of the concentration of  $\text{HSO}_4^-$  and its theoretical fit for the 1:1 binding of complex **3d** with  $\text{HSO}_4^-$ .

(a)

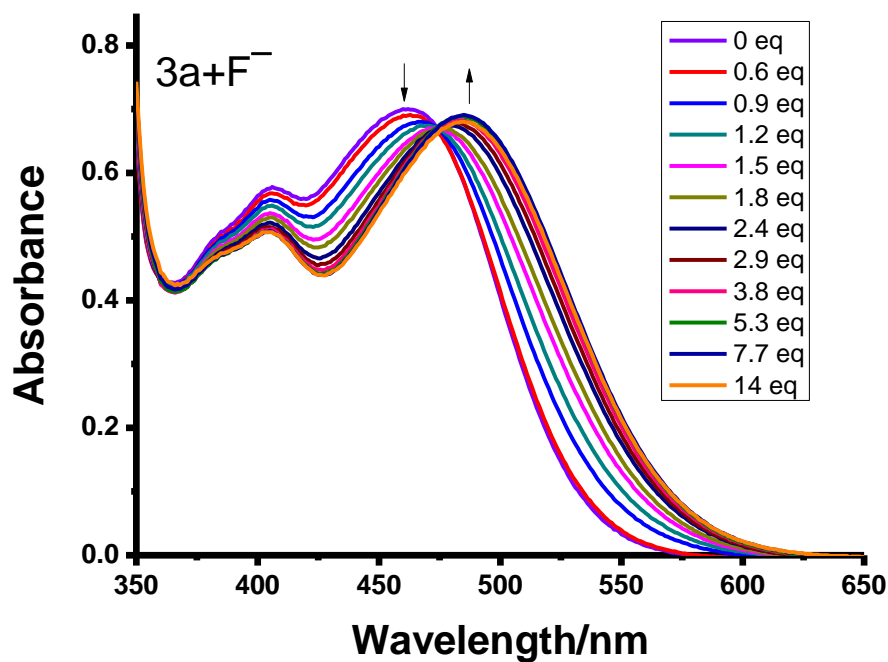

(b)

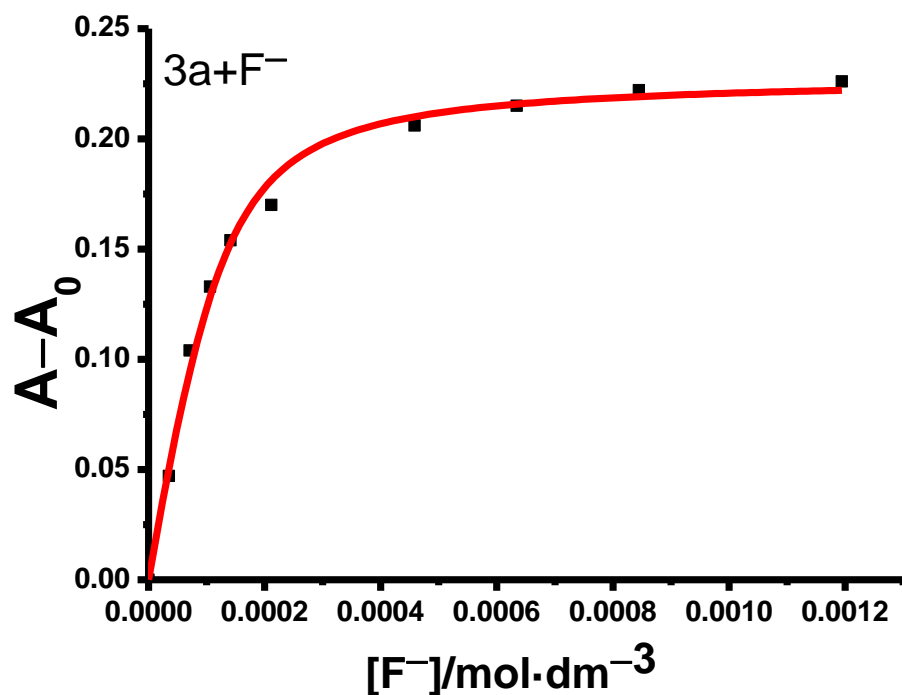

**Figure S13.** (a) UV-vis spectral changes of **3a** (1.2 × 10<sup>-4</sup> mol·dm<sup>-3</sup>) in CH<sub>3</sub>CN upon addition of F<sup>-</sup>. (b) A plot of the absorbance change at 510 nm as a function of the concentration of F<sup>-</sup> and its theoretical fit for the 1:1 binding of complex **3a** with F<sup>-</sup>.

(a)

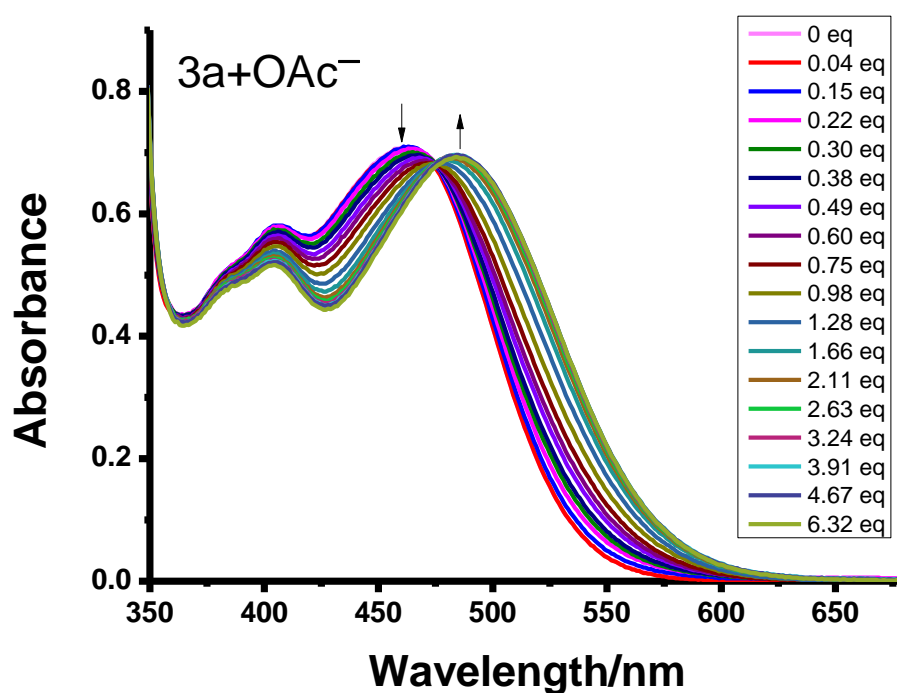

(b)

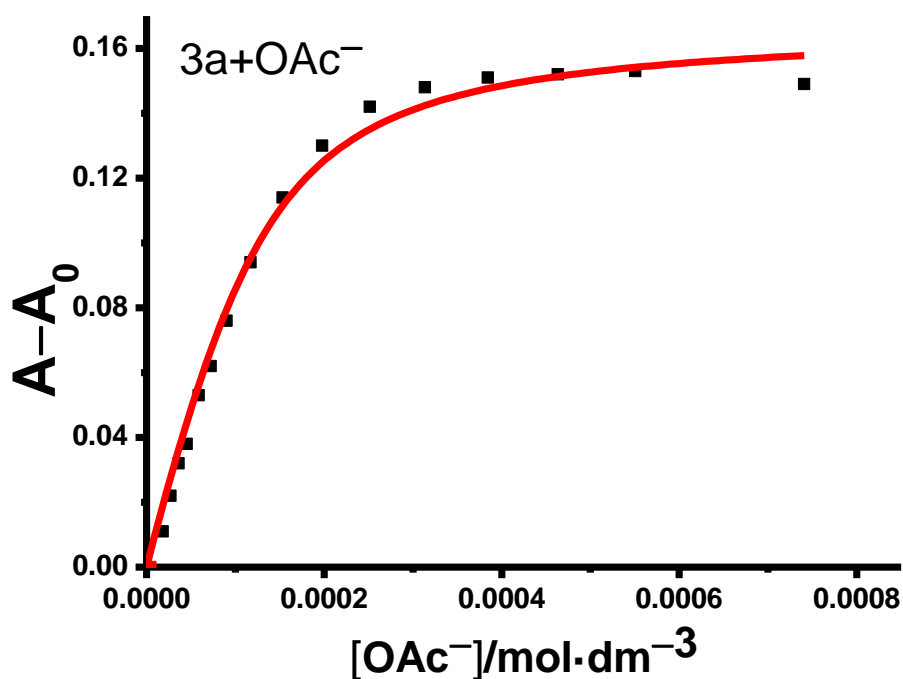

**Figure S14.** (a) UV-vis spectral changes of **3a** ( $1.2 \times 10^{-4} \text{ mol}\cdot\text{dm}^{-3}$ ) in CH<sub>3</sub>CN upon addition of OAc<sup>-</sup>. (b) A plot of the absorbance change at 490 nm as a function of the concentration of OAc<sup>-</sup> and its theoretical fit for the 1:1 binding of complex **3a** with OAc<sup>-</sup>.



(a)

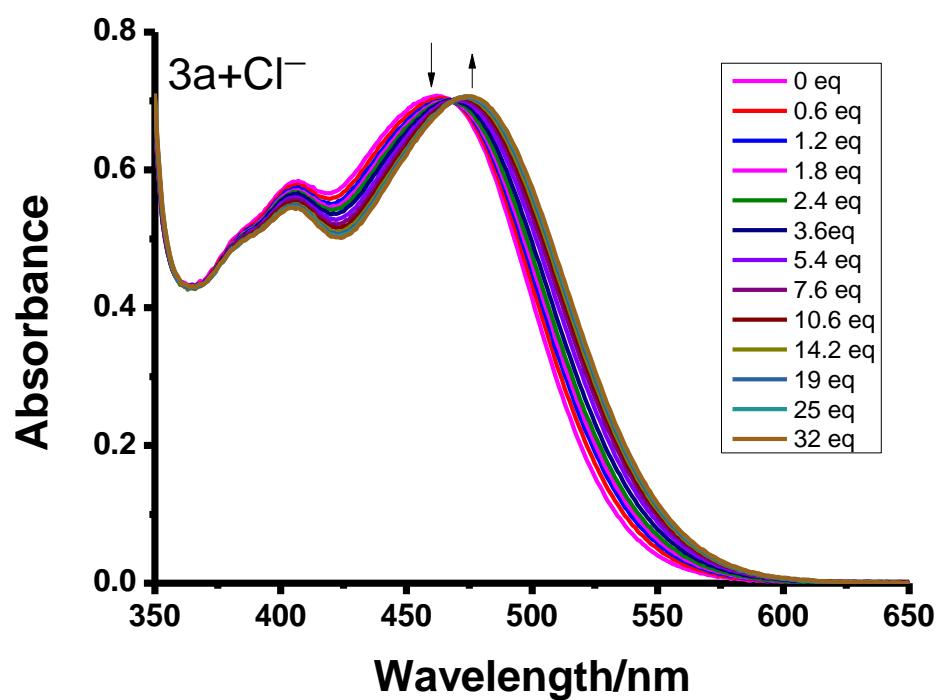

(b)

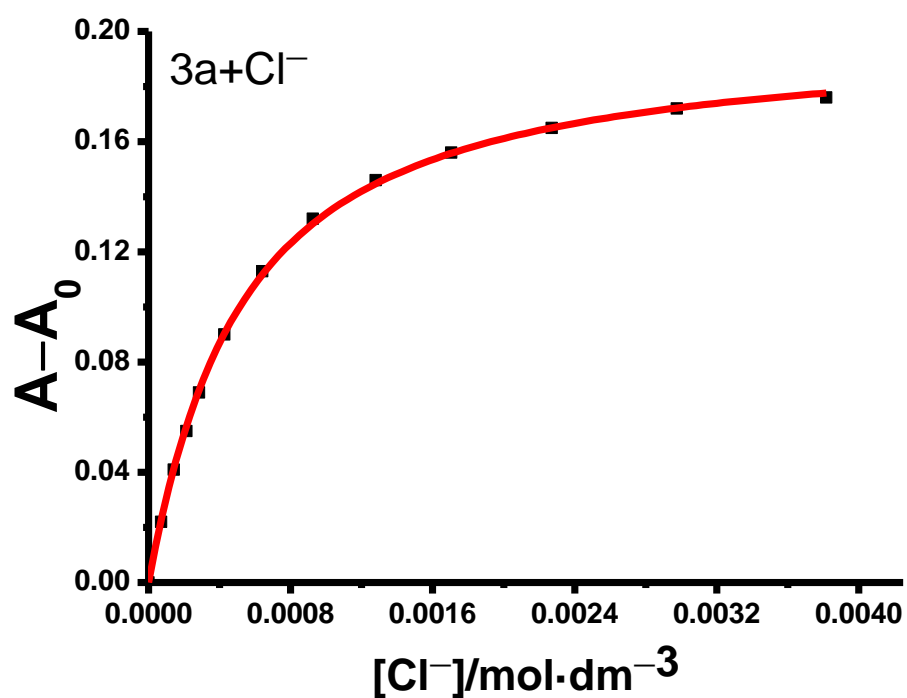

**Figure S15.** (a) UV-vis spectral changes of **3a** (1.2 × 10<sup>-4</sup> mol·dm<sup>-3</sup>) in CH<sub>3</sub>CN upon addition of Cl<sup>-</sup>. (b) A plot of the absorbance change at 510 nm as a function of the concentration of Cl<sup>-</sup> and its theoretical fit for the 1:1 binding of complex **3a** with Cl<sup>-</sup>.

(a)

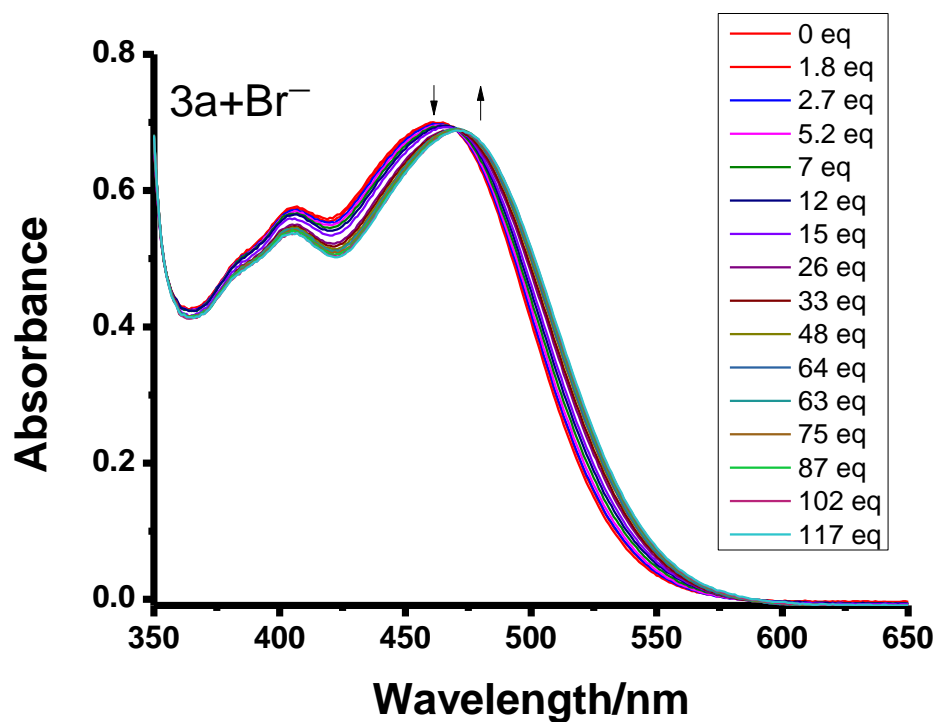

(b)

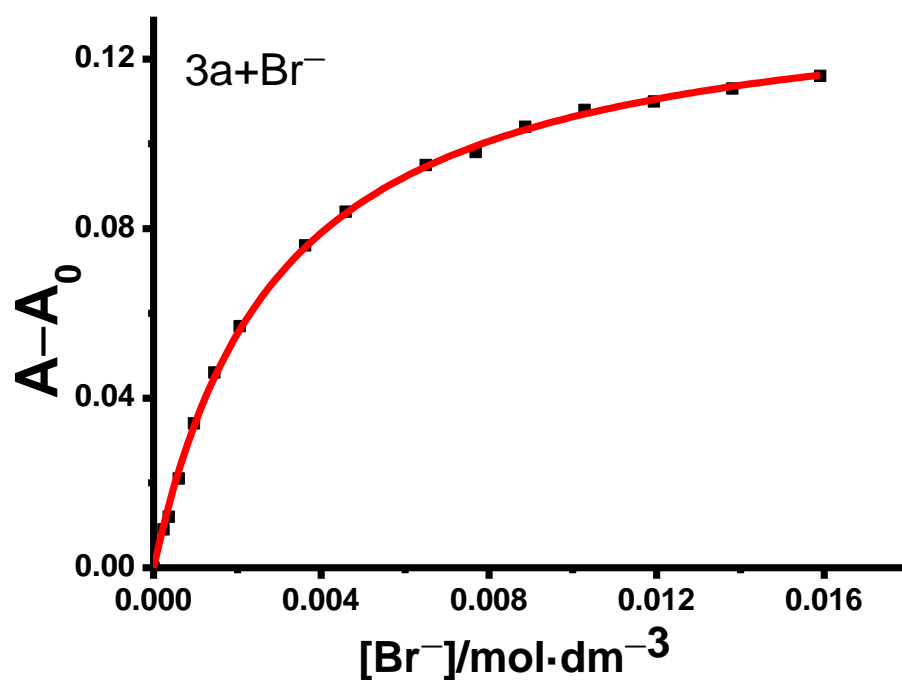

**Figure S16.** (a) UV-vis spectral changes of **3a** ( $1.2 \times 10^{-4} \text{ mol}\cdot\text{dm}^{-3}$ ) in  $\text{CH}_3\text{CN}$  upon addition of  $\text{Br}^-$ . (b) A plot of the absorbance change at 510 nm as a function of the concentration of  $\text{Br}^-$  and its theoretical fit for the 1:1 binding of complex **3a** with  $\text{Br}^-$ .

(a)

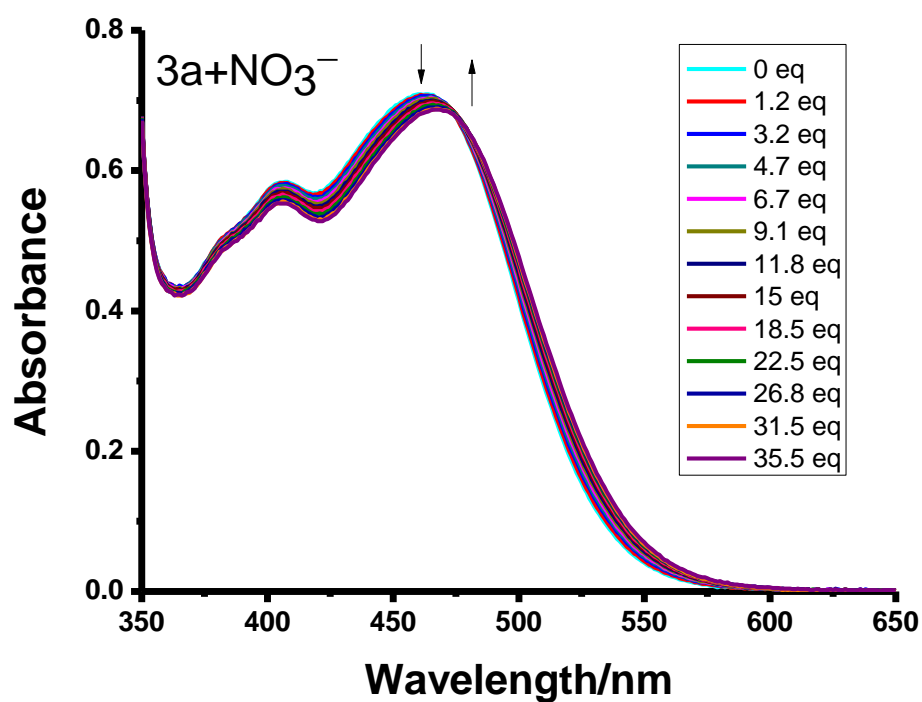

(b)

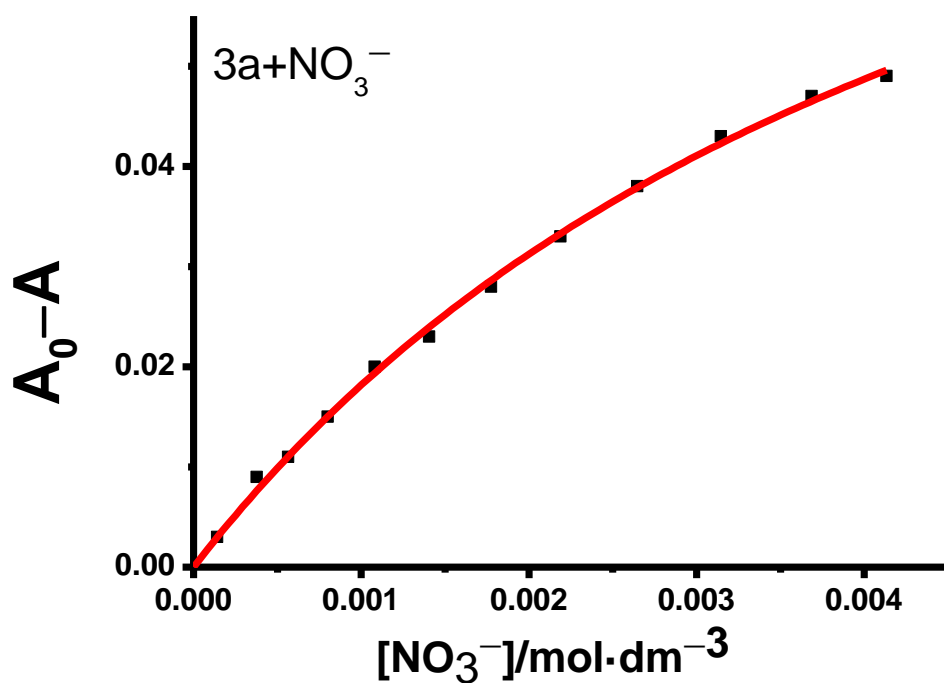

**Figure S17.** (a) UV-vis spectral changes of **3a** ( $1.2 \times 10^{-4}$  mol·dm<sup>-3</sup>) in CH<sub>3</sub>CN upon addition of NO<sub>3</sub><sup>-</sup>. (b) A plot of the absorbance change at 430 nm as a function of the concentration of NO<sub>3</sub><sup>-</sup> and its theoretical fit for the 1:1 binding of complex **3a** with NO<sub>3</sub><sup>-</sup>.

(a)

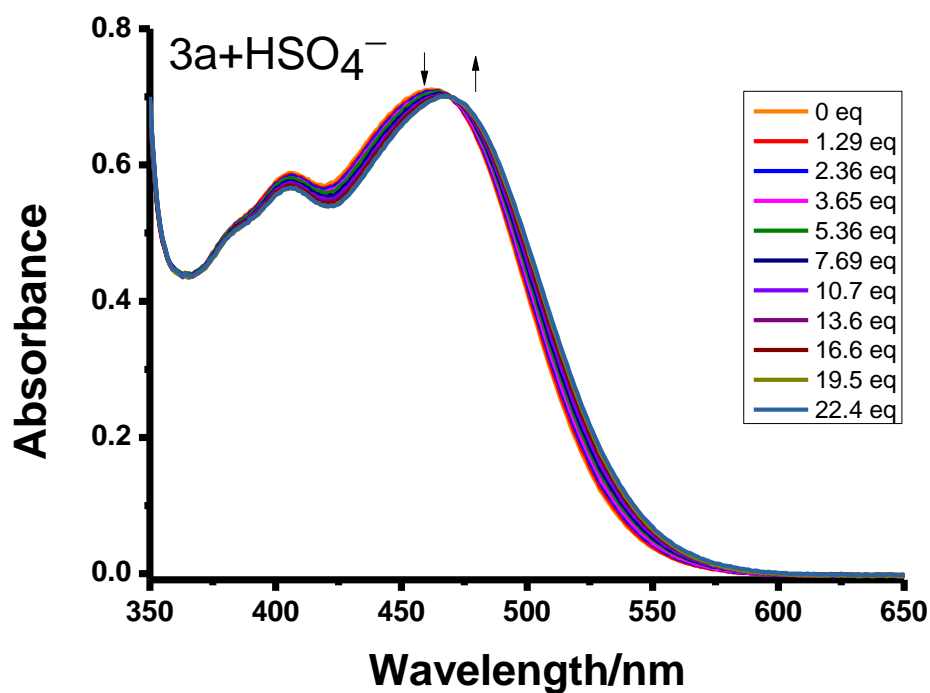

(b)

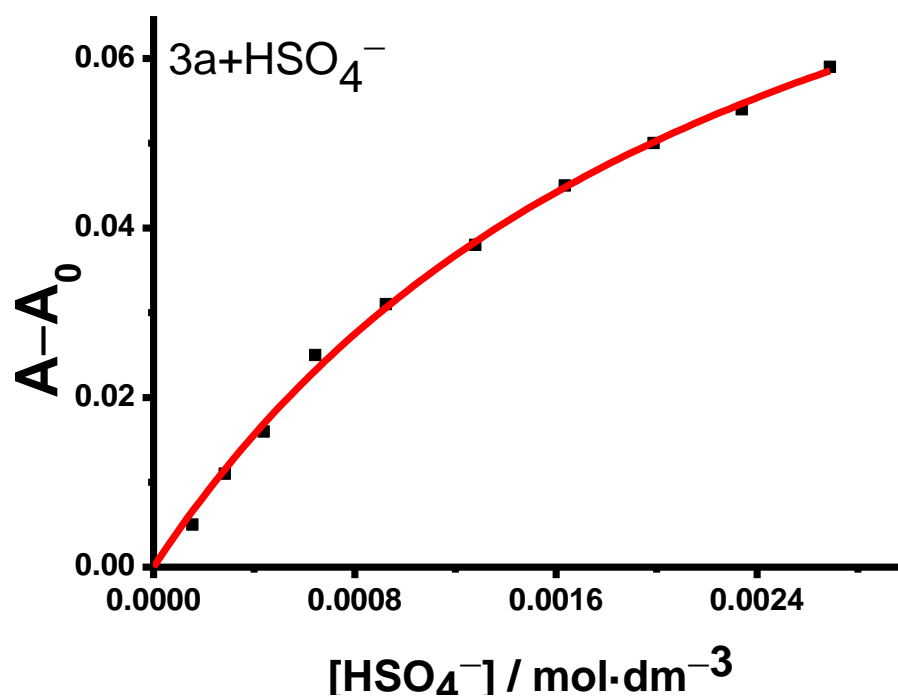

**Figure S18.** (a) UV-vis spectral changes of **3a** ( $1.2 \times 10^{-4}$  mol·dm<sup>-3</sup>) in CH<sub>3</sub>CN upon addition of HSO<sub>4</sub><sup>-</sup>. (b) A plot of the absorbance change at 530 nm as a function of the concentration of HSO<sub>4</sub><sup>-</sup> and its theoretical fit for the 1:1 binding of complex **3a** with HSO<sub>4</sub><sup>-</sup>.

(a)

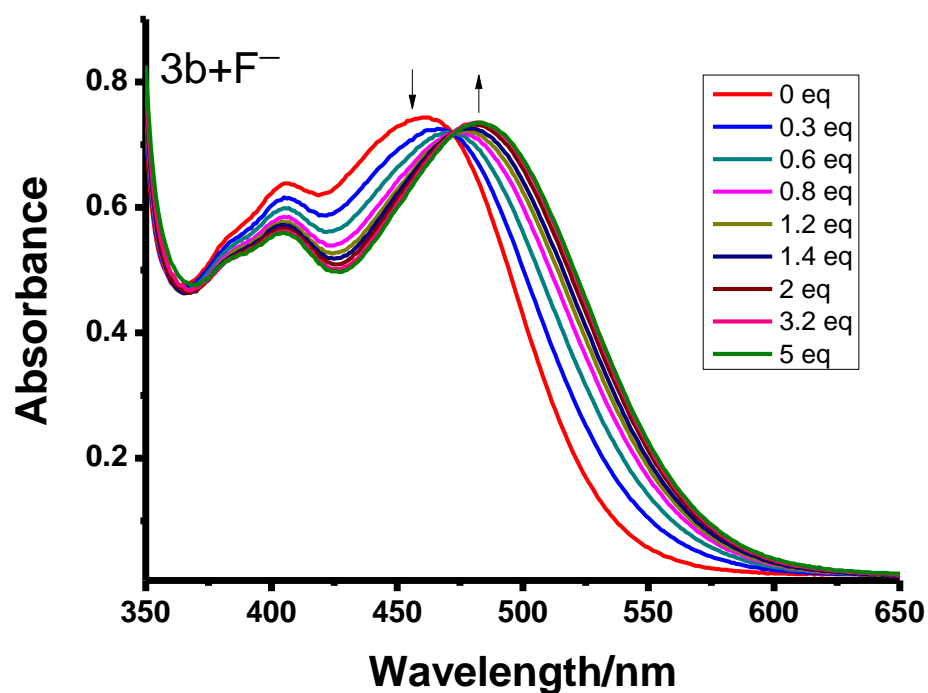

(b)

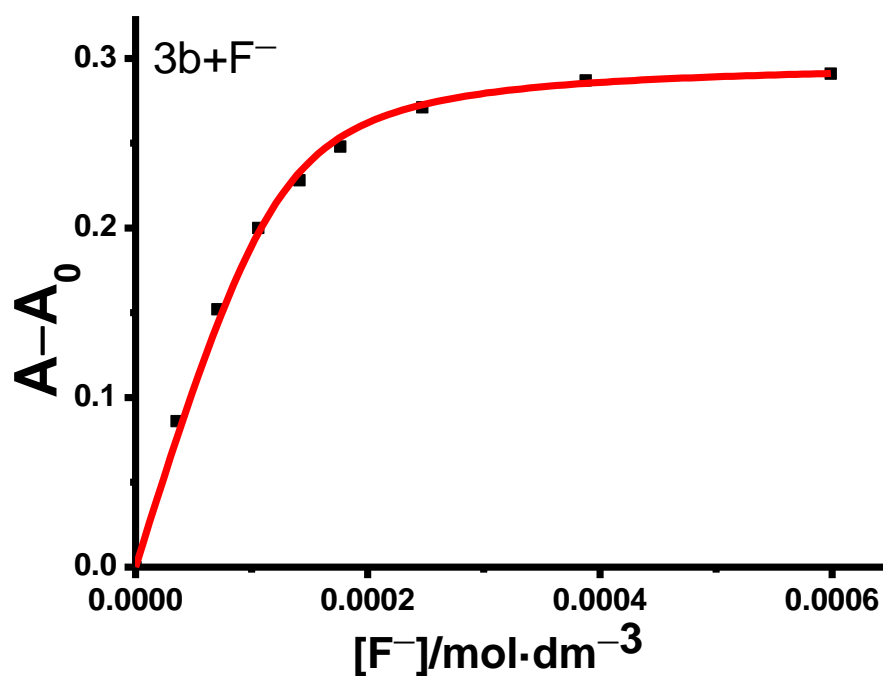

**Figure S19.** (a) UV-vis spectral changes of **3b** ( $1.2 \times 10^{-4} \text{ mol}\cdot\text{dm}^{-3}$ ) in  $\text{CH}_3\text{CN}$  upon addition of  $\text{F}^-$ . (b) A plot of the absorbance change at 510 nm as a function of the concentration of  $\text{F}^-$  and its theoretical fit for the 1:1 binding of complex **3b** with  $\text{F}^-$ .

(a)

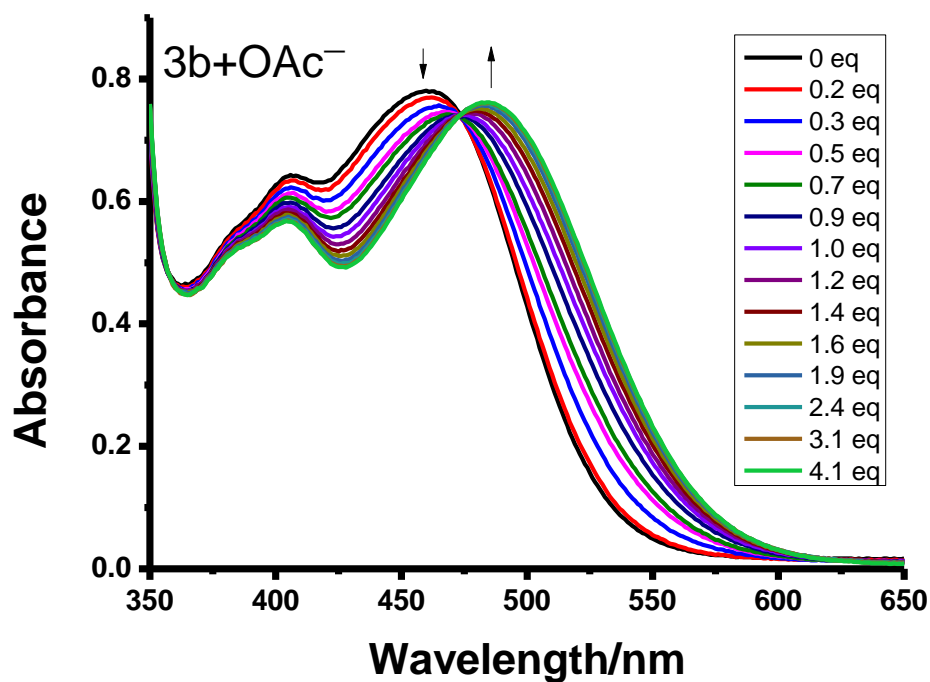

(b)

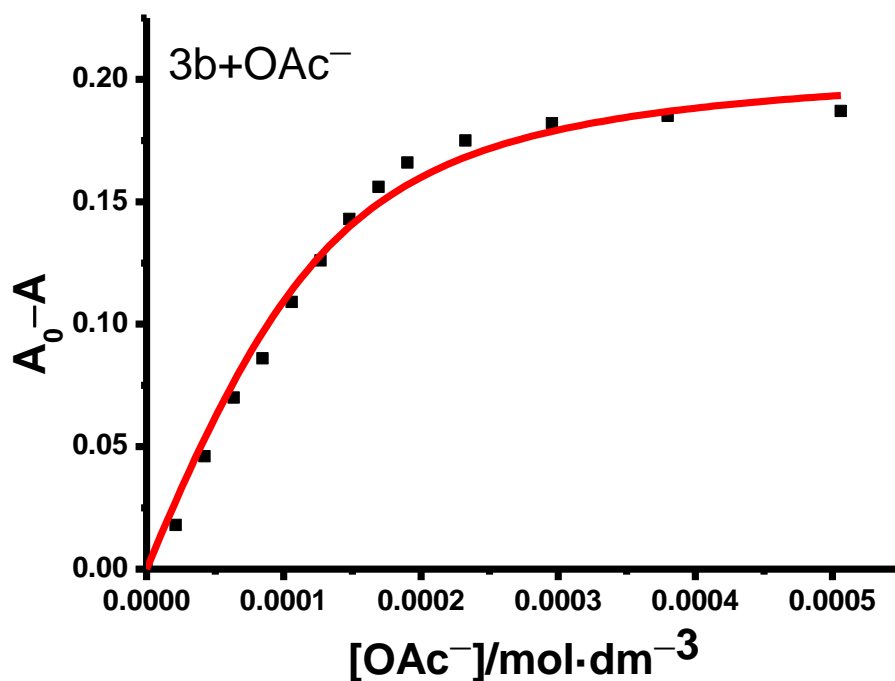

**Figure S20.** (a) UV-vis spectral changes of **3b** ( $1.2 \times 10^{-4} \text{ mol}\cdot\text{dm}^{-3}$ ) in CH<sub>3</sub>CN upon addition of OAc<sup>-</sup>. (b) A plot of the absorbance change at 440 nm as a function of the concentration of OAc<sup>-</sup> and its theoretical fit for the 1:1 binding of complex **3b** with OAc<sup>-</sup>.

(a)

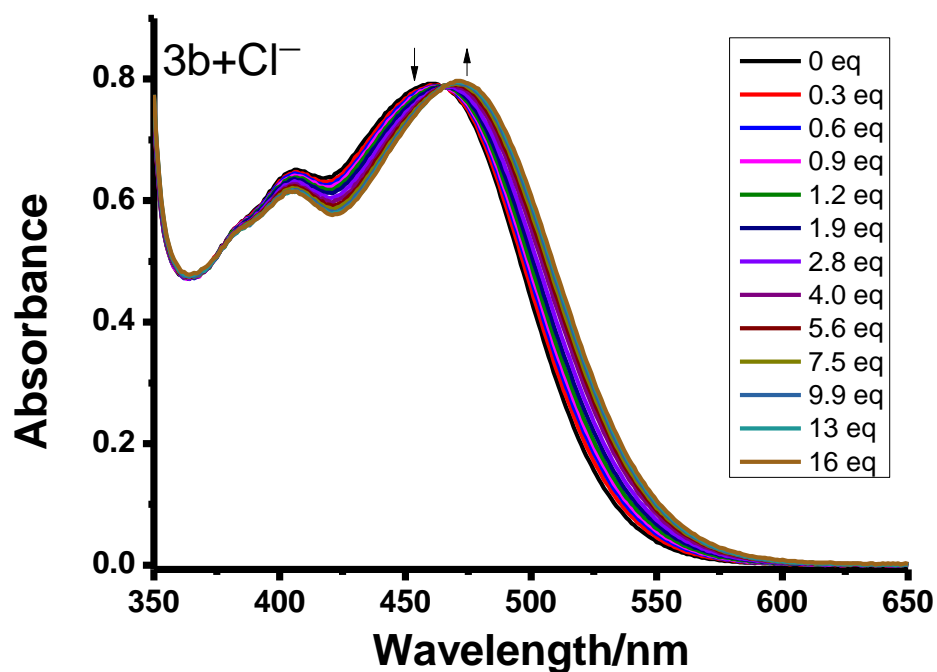

(b)

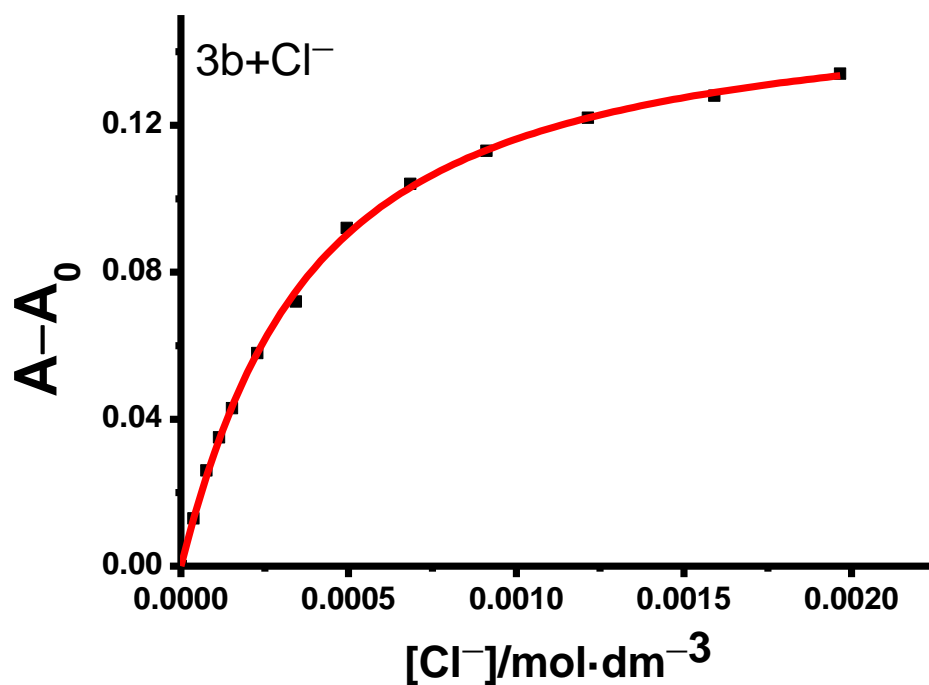

**Figure S21.** (a) UV-vis spectral changes of **3b** ( $1.2 \times 10^{-4} \text{ mol}\cdot\text{dm}^{-3}$ ) in  $\text{CH}_3\text{CN}$  upon addition of  $\text{Cl}^-$ . (b) A plot of the absorbance change at 490 nm as a function of the concentration of  $\text{Cl}^-$  and its theoretical fit for the 1:1 binding of complex **3b** with  $\text{Cl}^-$ .

(a)

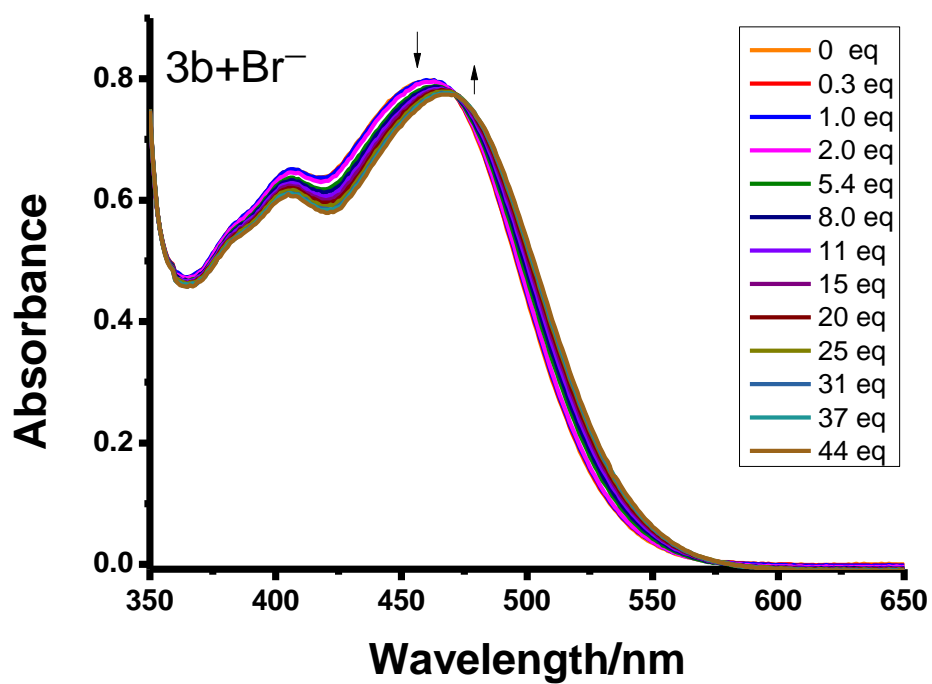

(b)

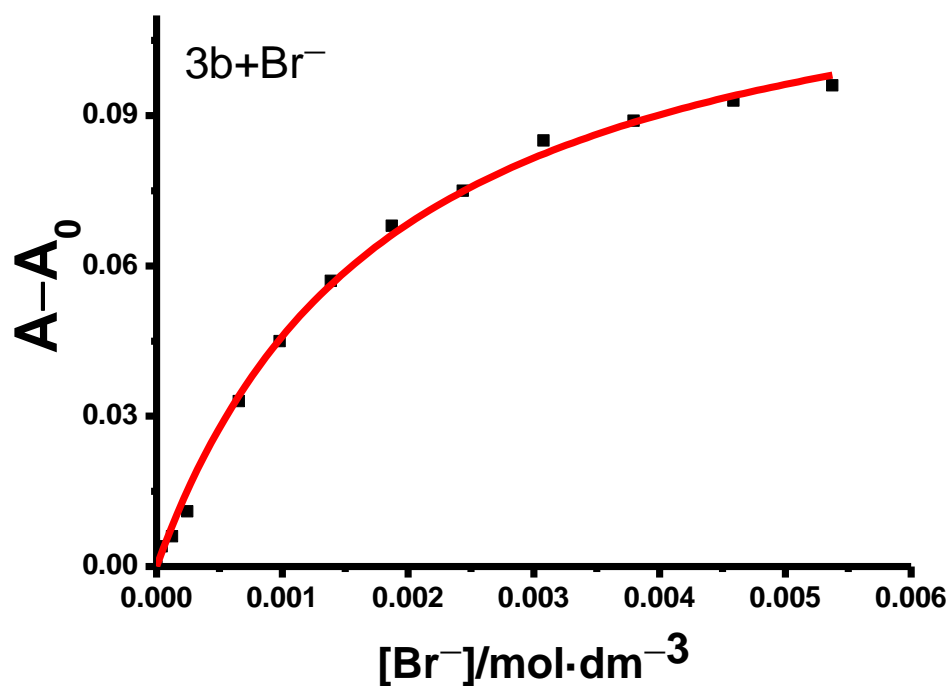

**Figure S22.** (a) UV-vis spectral changes of **3b** ( $1.2 \times 10^{-4} \text{ mol}\cdot\text{dm}^{-3}$ ) in  $\text{CH}_3\text{CN}$  upon addition of  $\text{Br}^-$ . (b) A plot of the absorbance change at 500 nm as a function of the concentration of  $\text{Br}^-$  and its theoretical fit for the 1:1 binding of complex **3b** with  $\text{Br}^-$ .



(a)

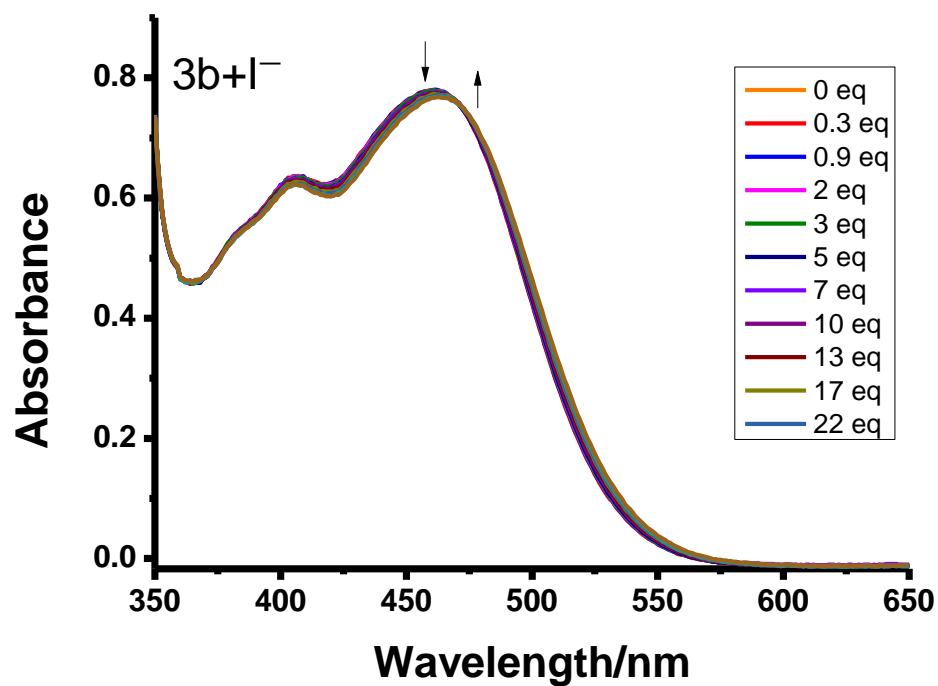

(b)

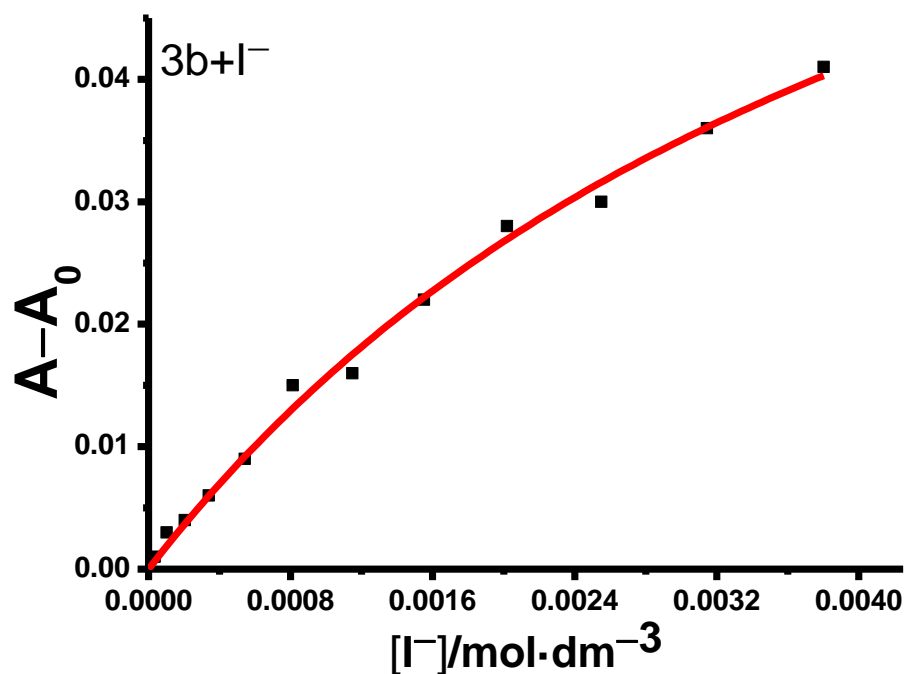

**Figure S23.** (a) UV-vis spectral changes of **3b** ( $1.2 \times 10^{-4} \text{ mol}\cdot\text{dm}^{-3}$ ) in  $\text{CH}_3\text{CN}$  upon addition of  $\text{I}^-$ . (b) A plot of the absorbance change at 500 nm as a function of the concentration of  $\text{I}^-$  and its theoretical fit for the 1:1 binding of complex **3b** with  $\text{I}^-$ .

(a)

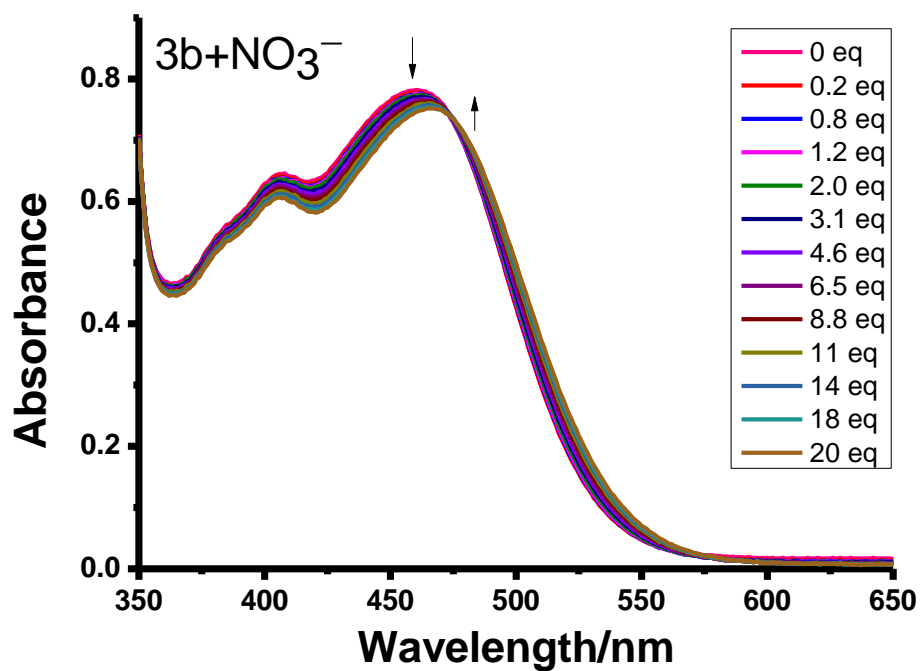

(b)

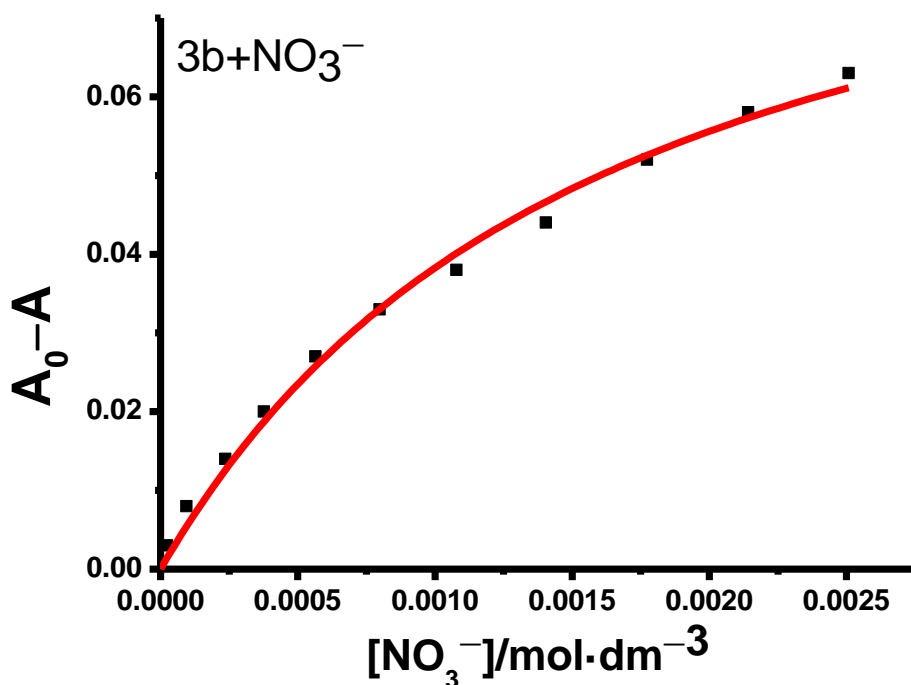

**Figure S24.** (a) UV-vis spectral changes of **3b** ( $1.2 \times 10^{-4} \text{ mol}\cdot\text{dm}^{-3}$ ) in  $\text{CH}_3\text{CN}$  upon addition of  $\text{NO}_3^-$ . (b) A plot of the absorbance change at 440 nm as a function of the concentration of  $\text{NO}_3^-$  and its theoretical fit for the 1:1 binding of complex **3b** with  $\text{NO}_3^-$ .

(a)

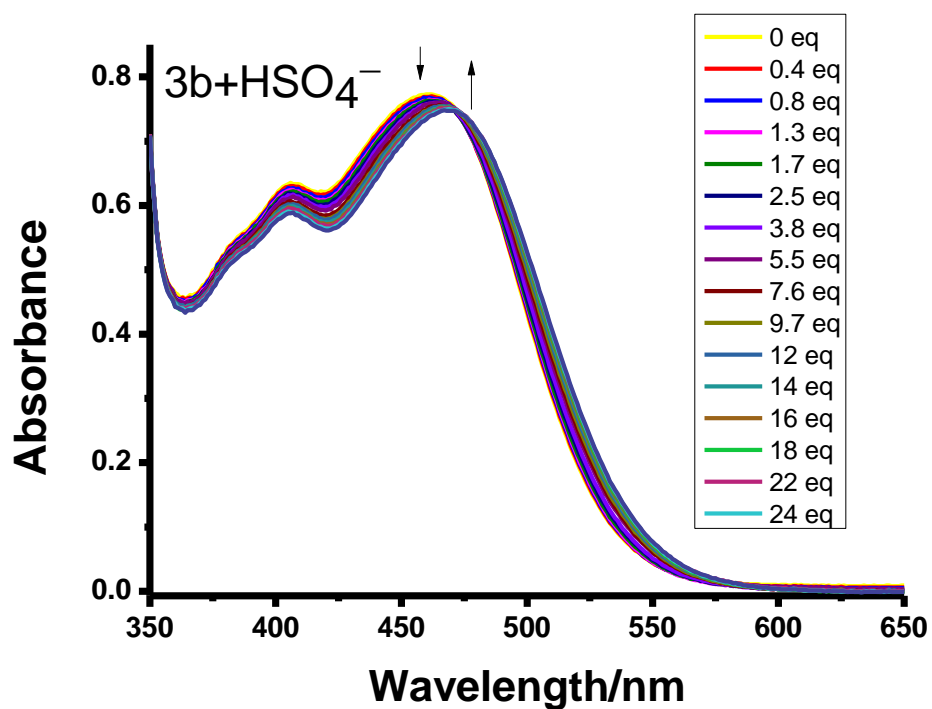

(b)

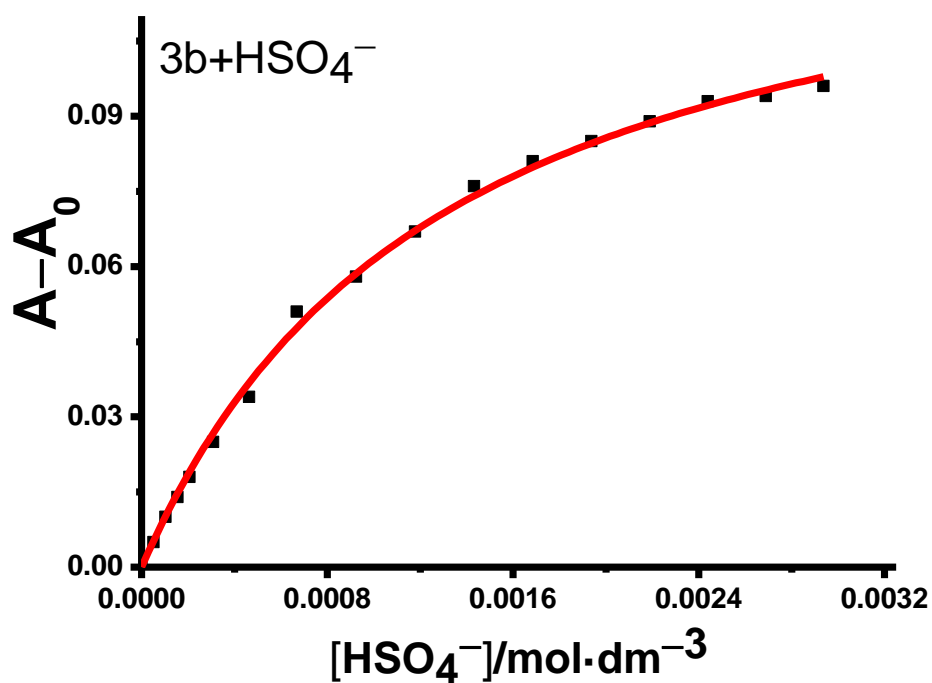

**Figure S25.** (a) UV-vis spectral changes of **3b** (1.2 × 10<sup>-4</sup> mol·dm<sup>-3</sup>) in CH<sub>3</sub>CN upon addition of HSO<sub>4</sub><sup>-</sup>. (b) A plot of the absorbance change at 500 nm as a function of the concentration of HSO<sub>4</sub><sup>-</sup> and its theoretical fit for the 1:1 binding of complex **3b** with HSO<sub>4</sub><sup>-</sup>.

(a)

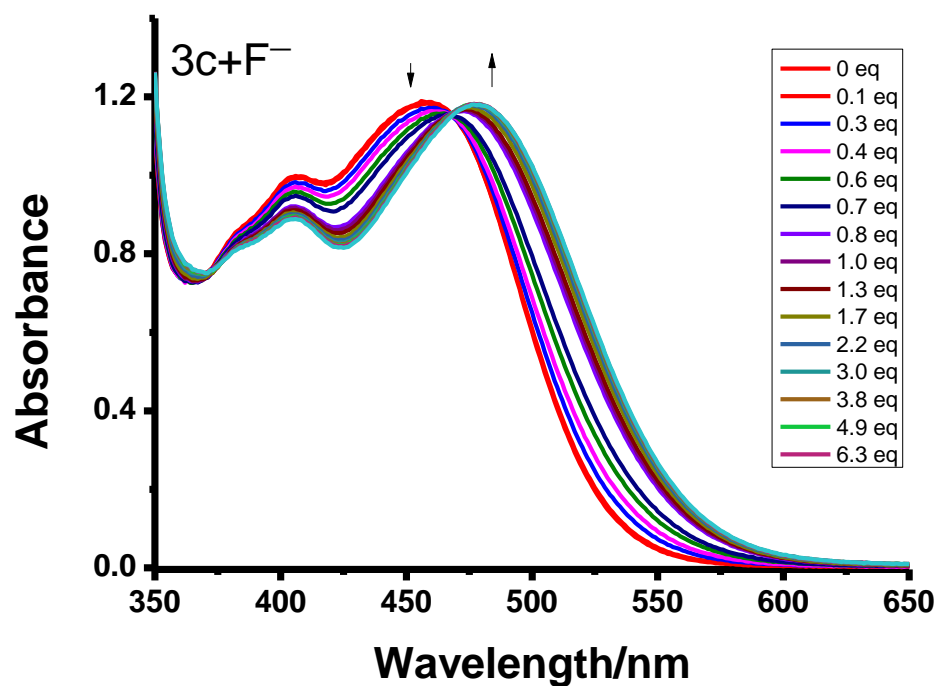

(b)

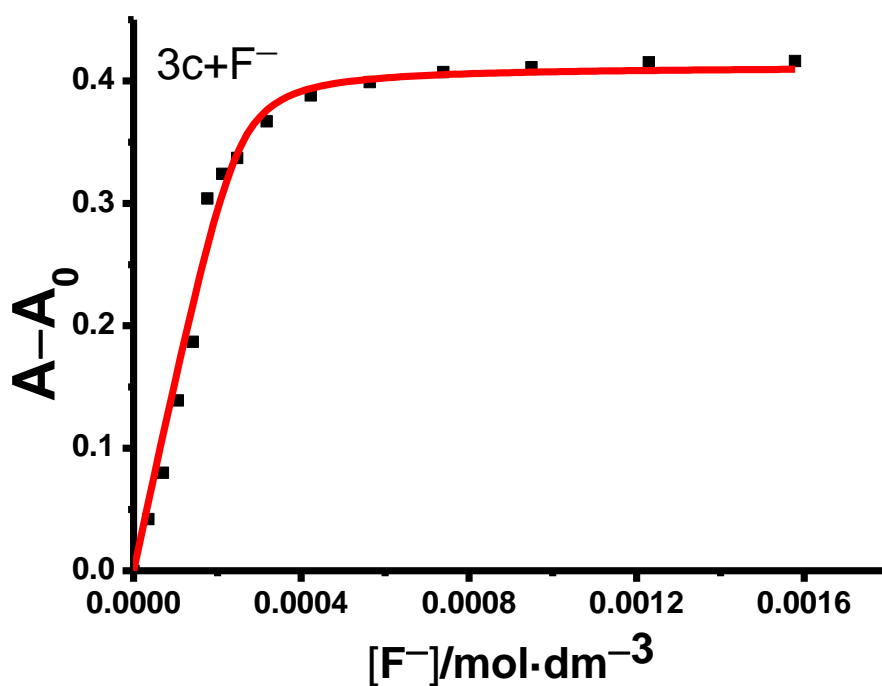

**Figure S26.** (a) UV-vis spectral changes of **3c** ( $2.5 \times 10^{-4} \text{ mol}\cdot\text{dm}^{-3}$ ) in  $\text{CH}_3\text{CN}$  upon addition of  $\text{F}^-$ . (b) A plot of the absorbance change at 500 nm as a function of the concentration of  $\text{F}^-$  and its theoretical fit for the 1:1 binding of complex **3c** with  $\text{F}^-$ .

(a)

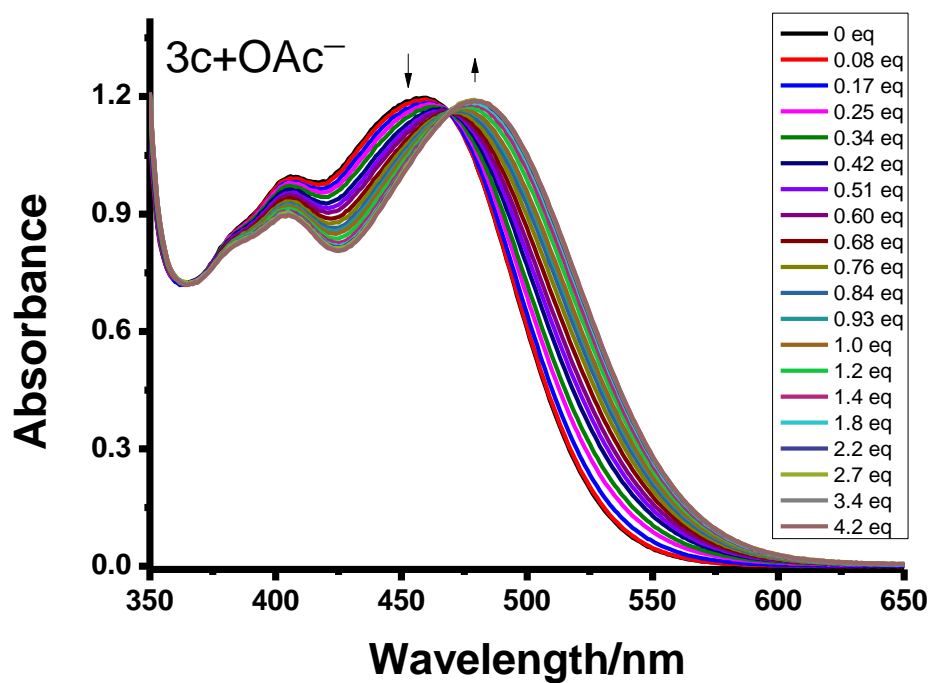

(b)

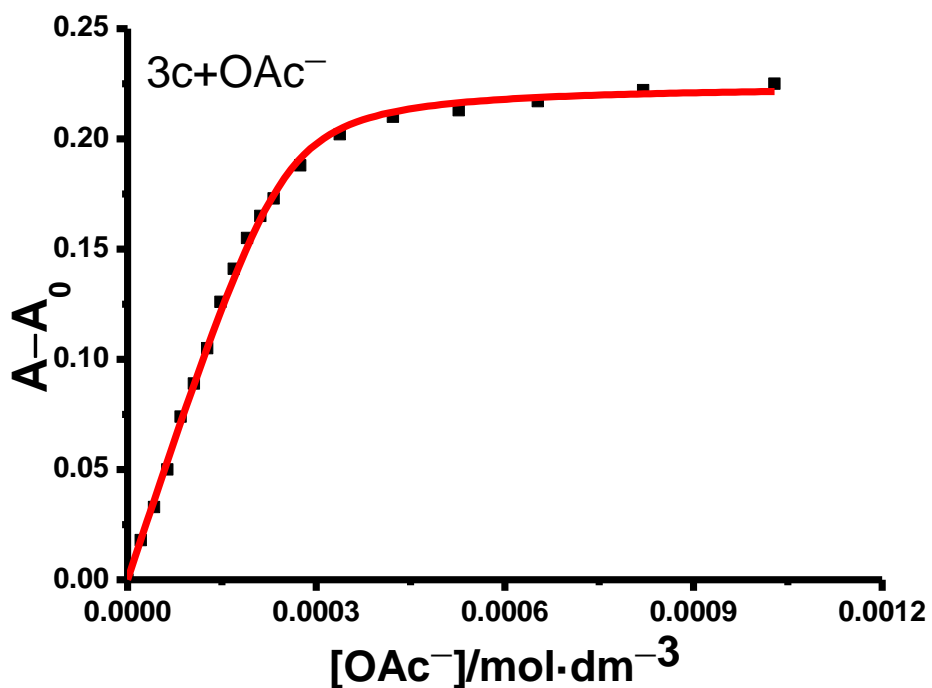

**Figure S27.** (a) UV-vis spectral changes of **3c** ( $2.5 \times 10^{-4} \text{ mol}\cdot\text{dm}^{-3}$ ) in  $\text{CH}_3\text{CN}$  upon addition of  $\text{OAc}^-$ . (b) A plot of the absorbance change at 430 nm as a function of the concentration of  $\text{OAc}^-$  and its theoretical fit for the 1:1 binding of complex **3c** with  $\text{OAc}^-$ .

(a)

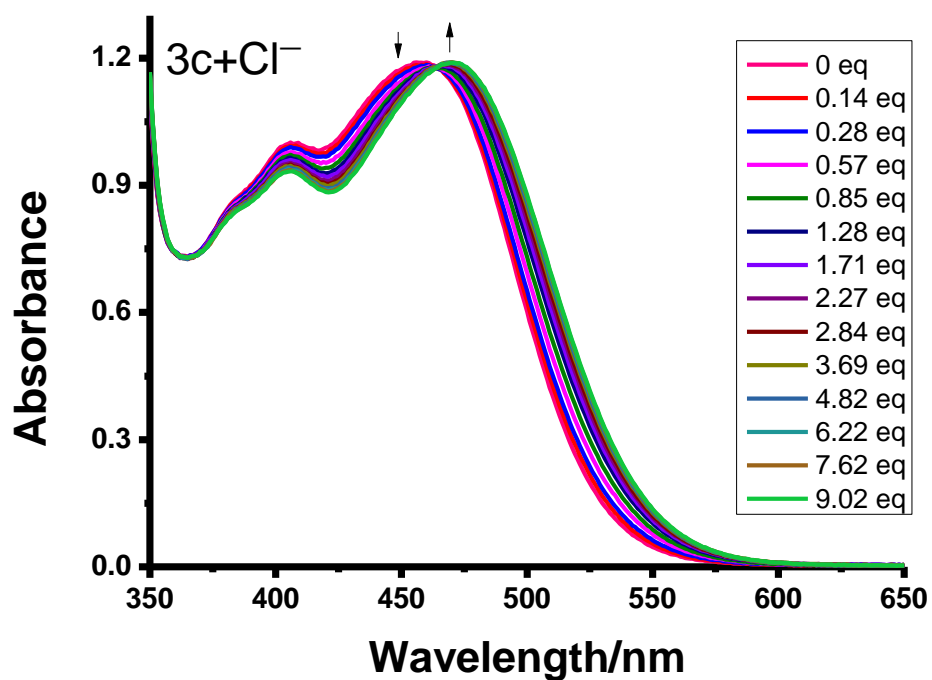

(b)

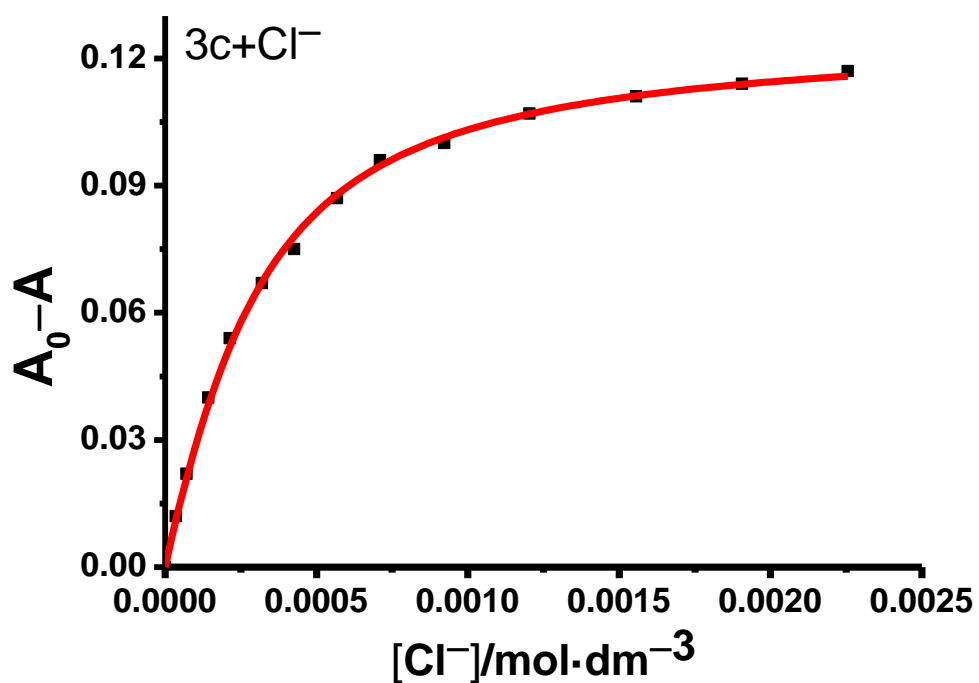

**Figure S28.** (a) UV-vis spectral changes of **3c** ( $2.5 \times 10^{-4} \text{ mol}\cdot\text{dm}^{-3}$ ) in  $\text{CH}_3\text{CN}$  upon addition of  $\text{Cl}^-$ . (b) A plot of the absorbance change at 440 nm as a function of the concentration of  $\text{Cl}^-$  and its theoretical fit for the 1:1 binding of complex **3c** with  $\text{Cl}^-$ .

(a)

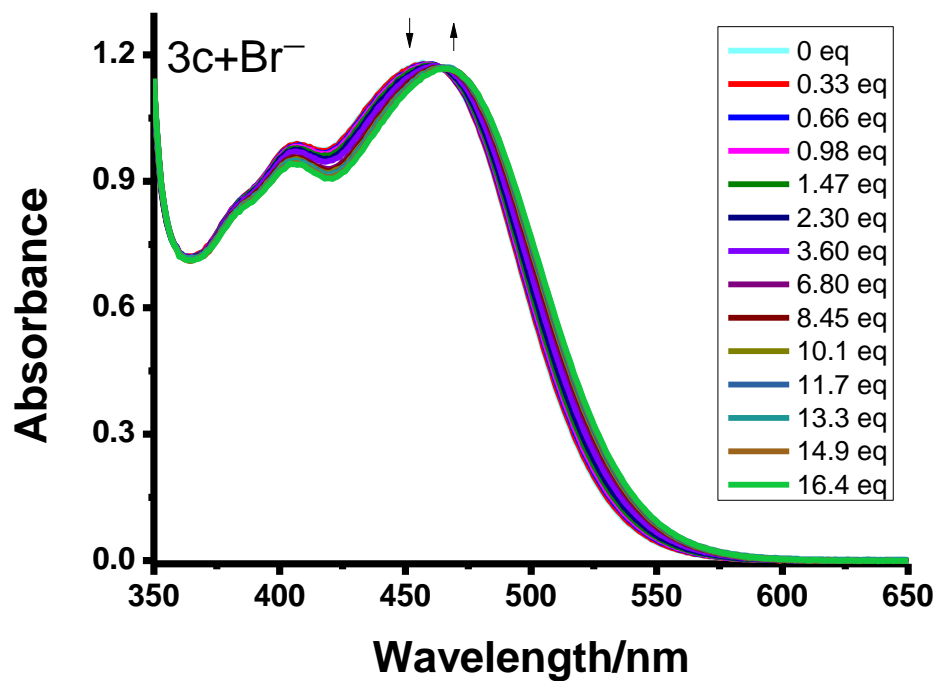

(b)

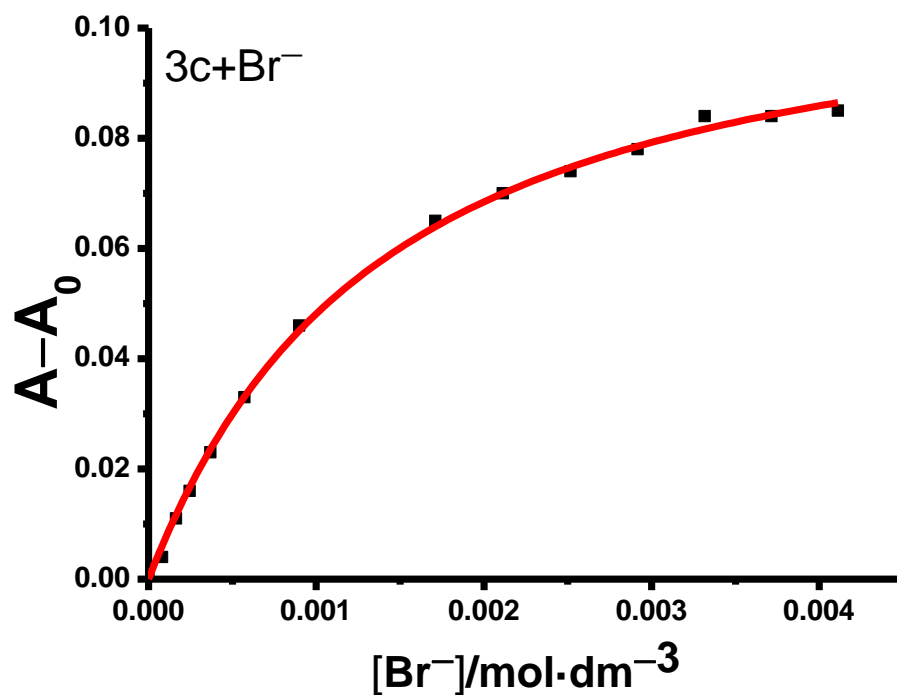

**Figure S29.** (a) UV-vis spectral changes of **3c** ( $2.5 \times 10^{-4} \text{ mol}\cdot\text{dm}^{-3}$ ) in  $\text{CH}_3\text{CN}$  upon addition of  $\text{Br}^-$ . (b) A plot of the absorbance change at 480 nm as a function of the concentration of  $\text{Br}^-$  and its theoretical fit for the 1:1 binding of complex **3c** with  $\text{Br}^-$ .

(a)

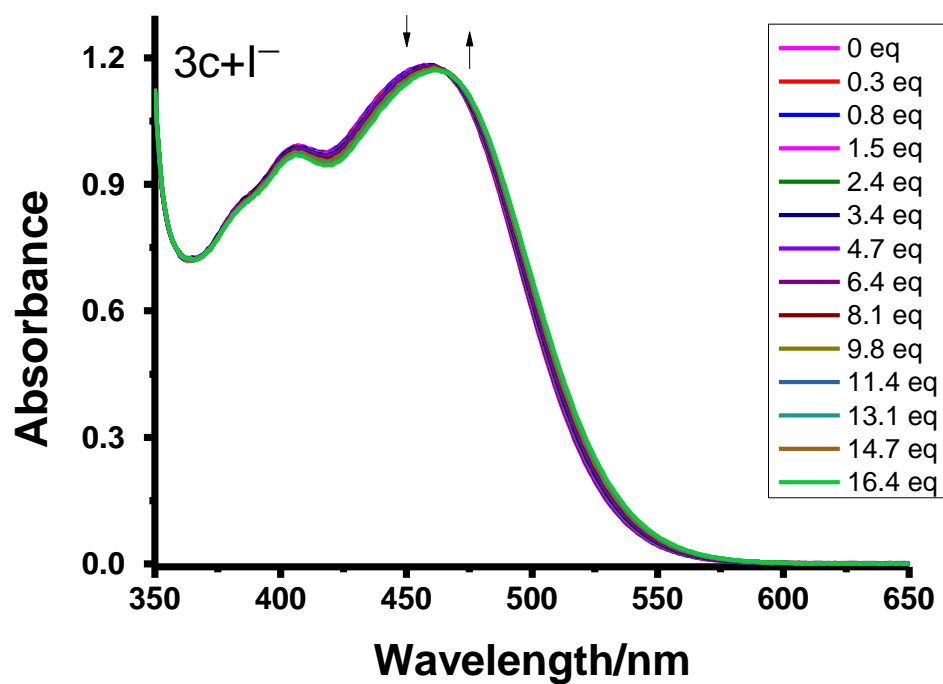

(b)

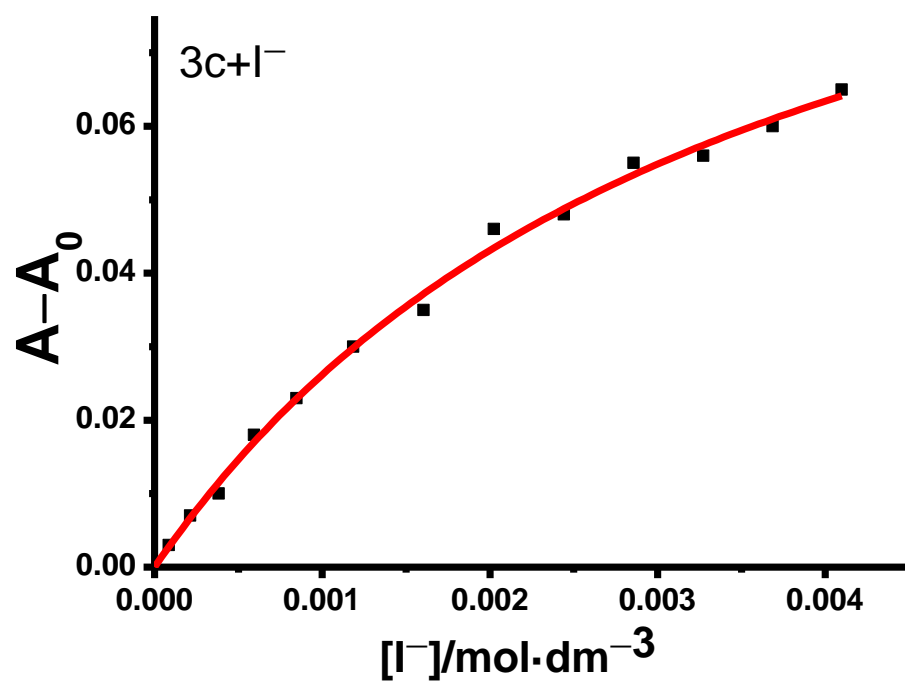

**Figure S30.** (a) UV-vis spectral changes of **3c** ( $2.5 \times 10^{-4} \text{ mol}\cdot\text{dm}^{-3}$ ) in  $\text{CH}_3\text{CN}$  upon addition of  $\text{I}^-$ . (b) A plot of the absorbance change at 490 nm as a function of the concentration of  $\text{I}^-$  and its theoretical fit for the 1:1 binding of complex **3c** with  $\text{I}^-$ .



(a)

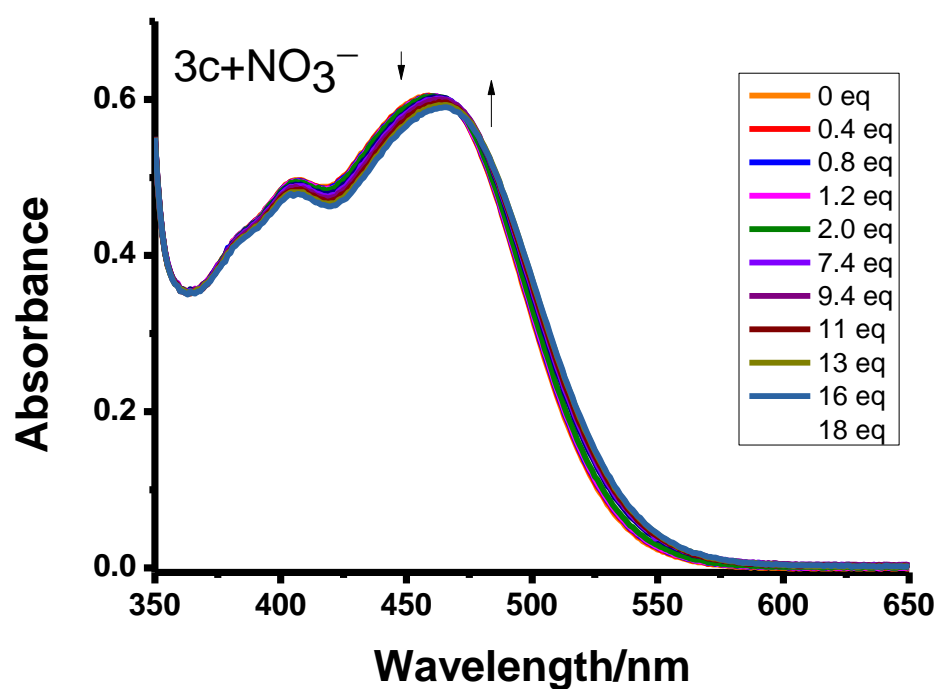

(b)

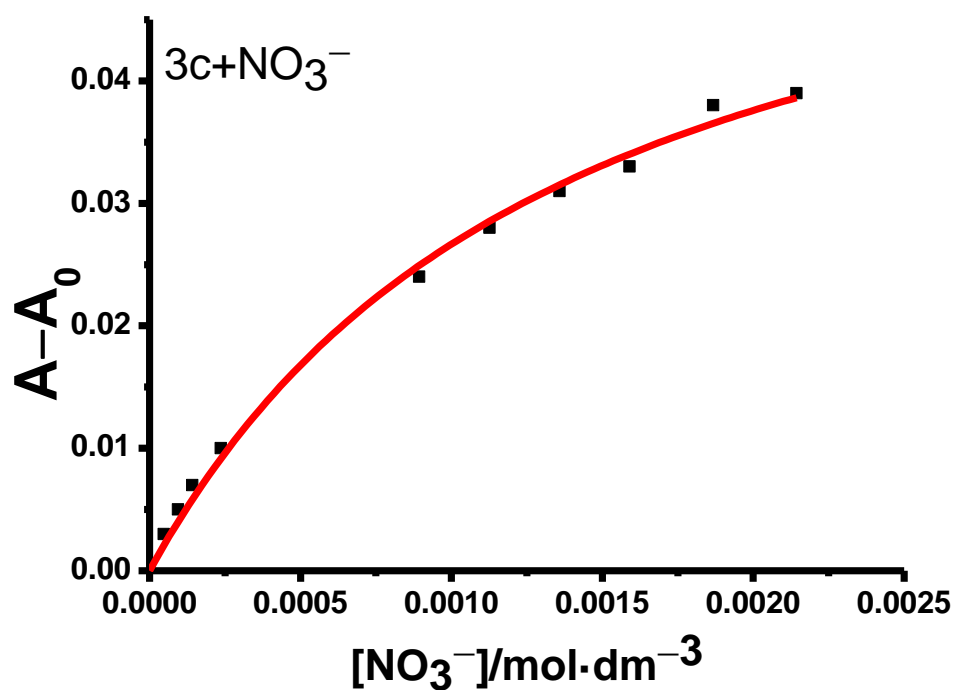

**Figure S31.** (a) UV-vis spectral changes of **3c** ( $2.5 \times 10^{-4} \text{ mol}\cdot\text{dm}^{-3}$ ) in  $\text{CH}_3\text{CN}$  upon addition of  $\text{NO}_3^-$ . (b) A plot of the absorbance change at 530 nm as a function of the concentration of  $\text{NO}_3^-$  and its theoretical fit for the 1:1 binding of complex **3c** with  $\text{NO}_3^-$ .

(a)

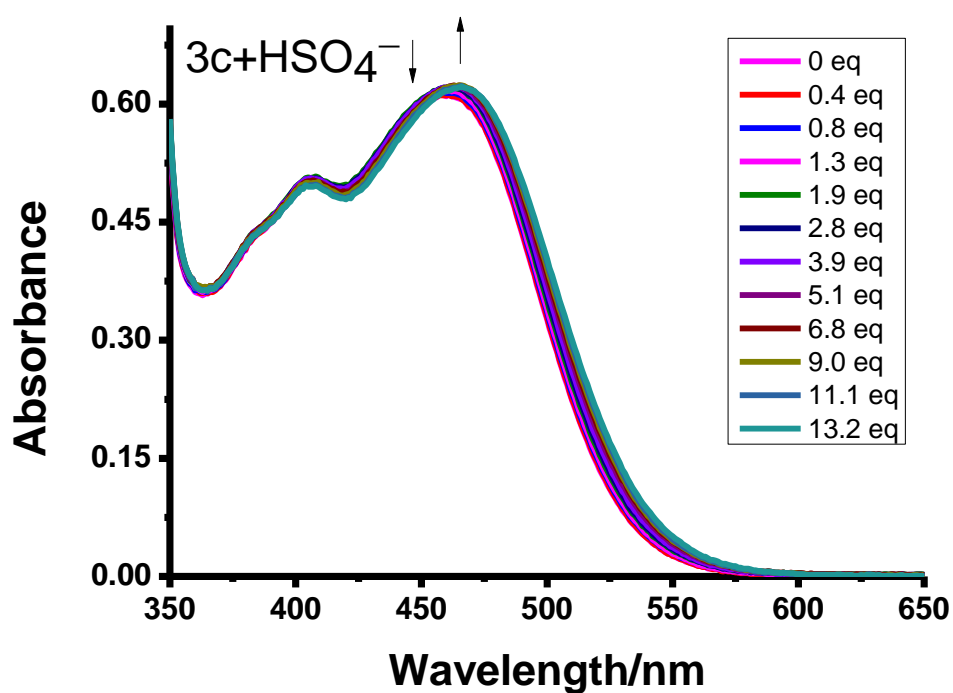

(b)

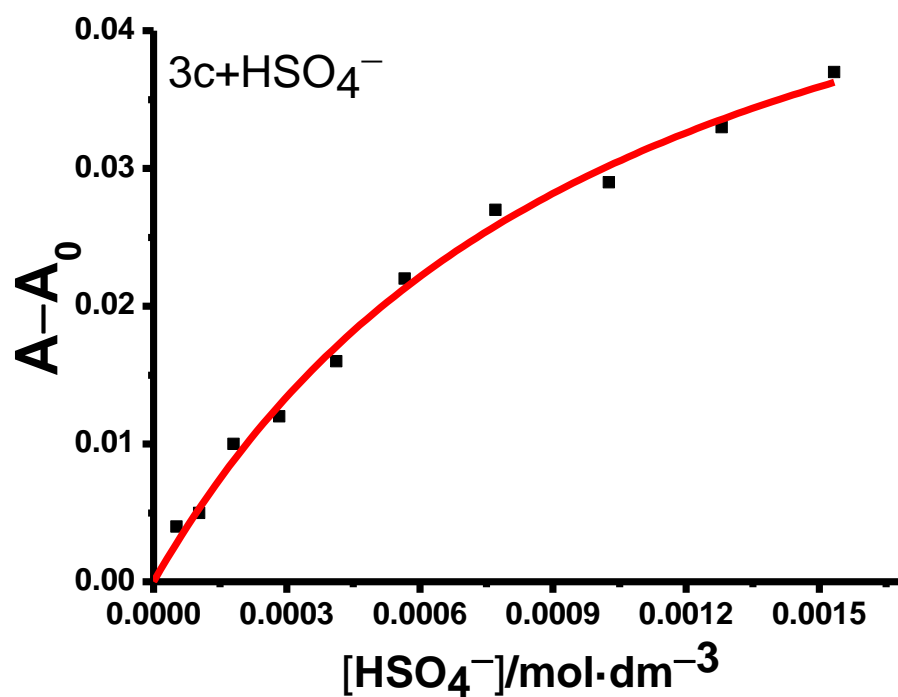

**Figure S32.** (a) UV-vis spectral changes of **3c** ( $2.5 \times 10^{-4}$  mol·dm<sup>-3</sup>) in CH<sub>3</sub>CN upon addition of HSO<sub>4</sub><sup>-</sup>. (b) A plot of the absorbance change at 540 nm as a function of the concentration of HSO<sub>4</sub><sup>-</sup> and its theoretical fit for the 1:1 binding of complex **3c** with HSO<sub>4</sub><sup>-</sup>.

(a)

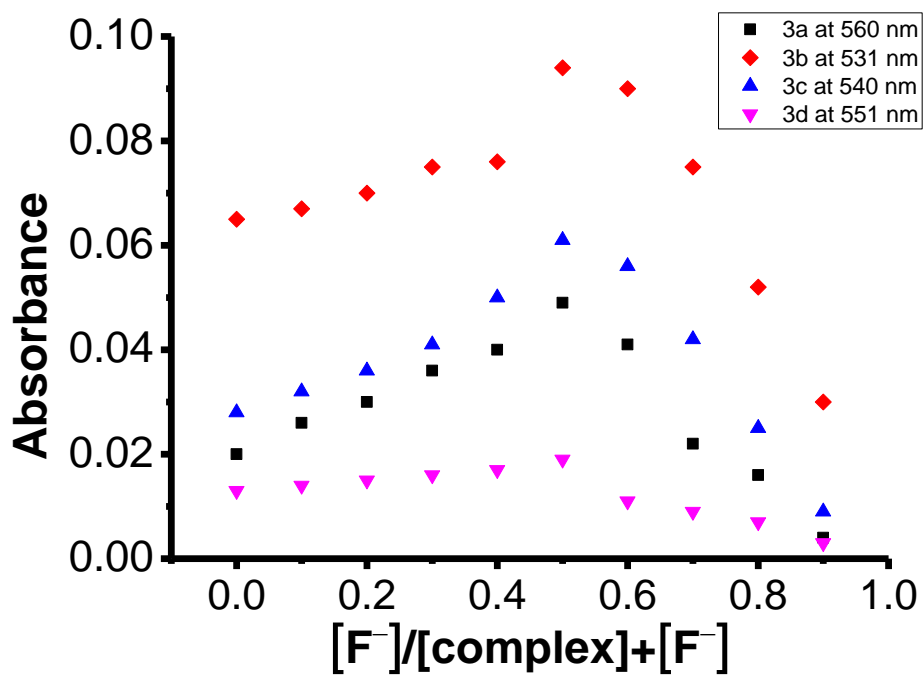

(b)

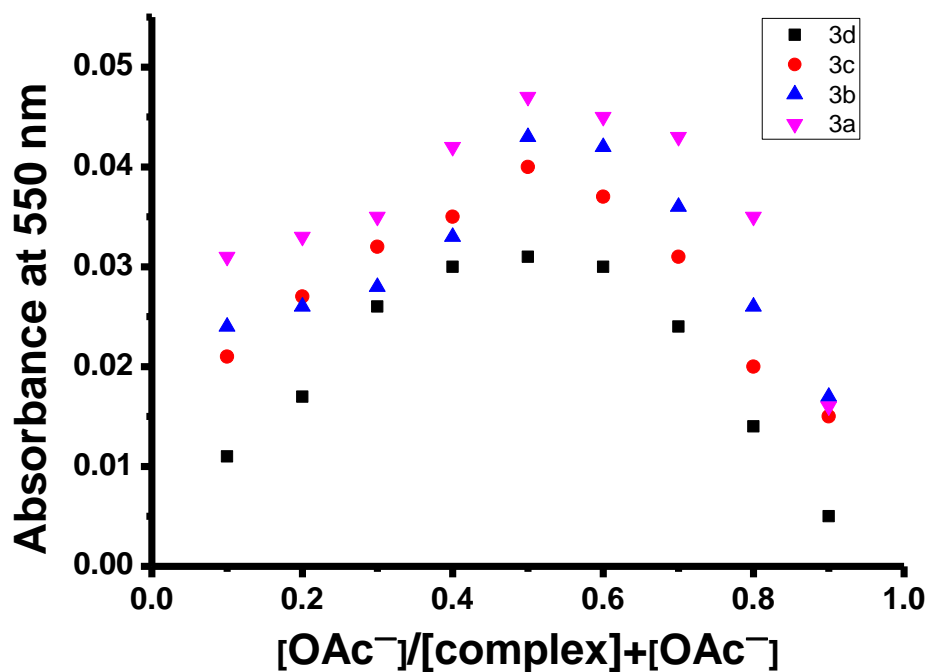

**Figure S33.** (a) Job's plots of complexes **3a–3c** with  $F^-$  in  $CH_3CN$  ( $[complex] + [F^-] = 1 \times 10^{-4} \text{ mol}\cdot\text{dm}^{-3}$ ); (b) Job's plots of complexes **3a–3d** with  $OAc^-$  in  $CH_3CN$  ( $[complex] + [OAc^-] = 1 \times 10^{-4} \text{ mol}\cdot\text{dm}^{-3}$ )

(a)

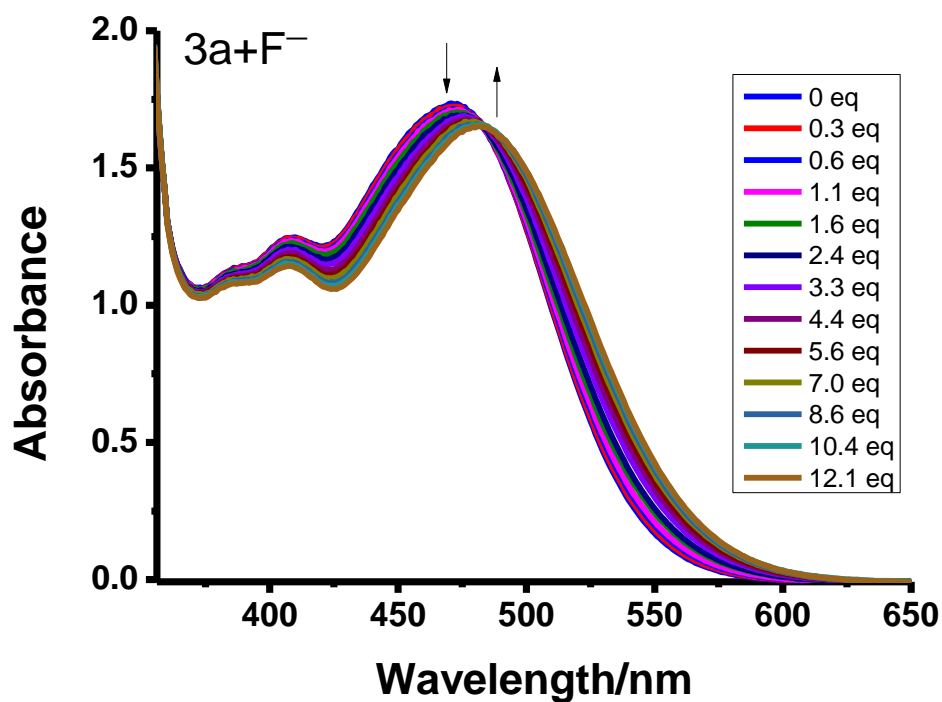

(b)

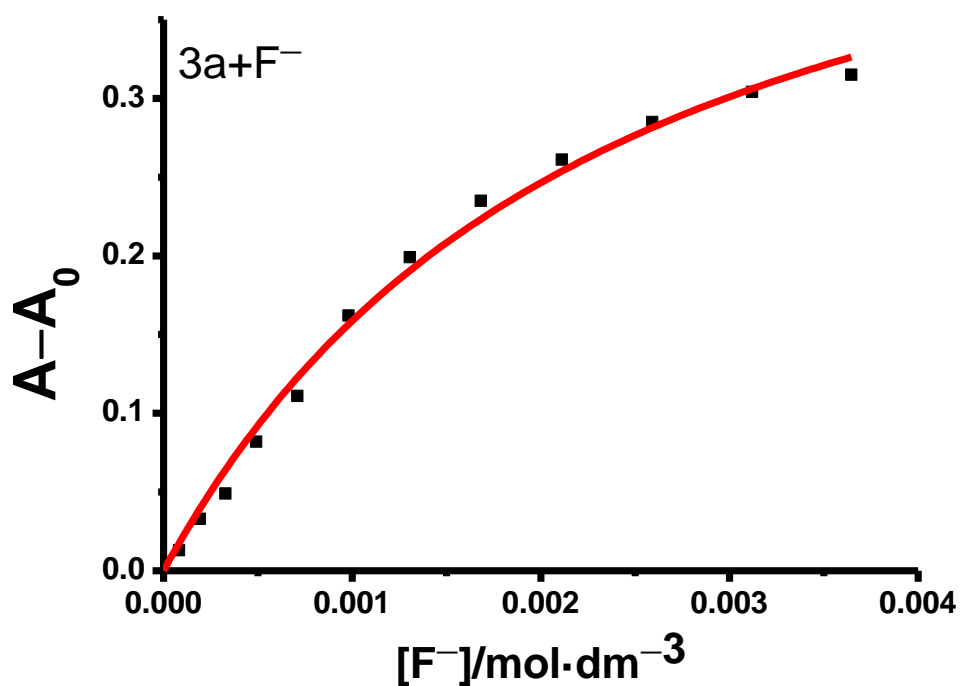

**Figure S34.** (a) UV-vis spectral changes of **3a** ( $3 \times 10^{-4} \text{ mol}\cdot\text{dm}^{-3}$ ) in DMSO upon addition of  $\text{F}^-$ . (b) A plot of the absorbance change at 510 nm as a function of the concentration of  $\text{F}^-$  and its theoretical fit for the 1:1 binding of complex **3a** with  $\text{F}^-$ .

(a)

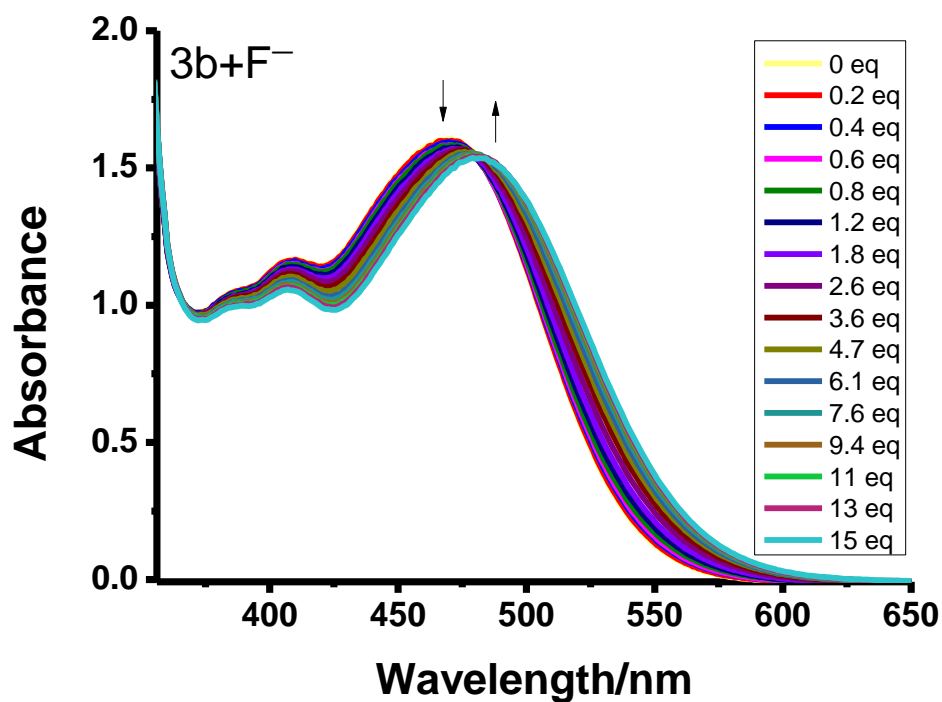

(b)

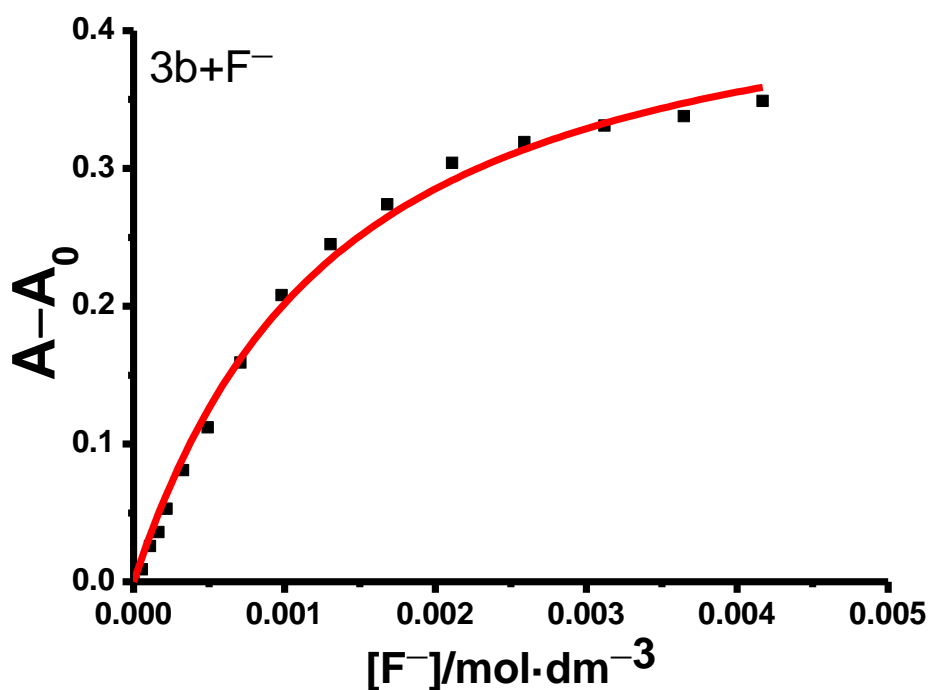

**Figure S35.** (a) UV-vis spectral changes of **3b** (2.76 × 10<sup>-4</sup> mol·dm<sup>-3</sup>) in DMSO upon addition of F<sup>-</sup>. (b) A plot of the absorbance change at 510 nm as a function of the concentration of F<sup>-</sup> and its theoretical fit for the 1:1 binding of complex **3b** with F<sup>-</sup>.

(a)

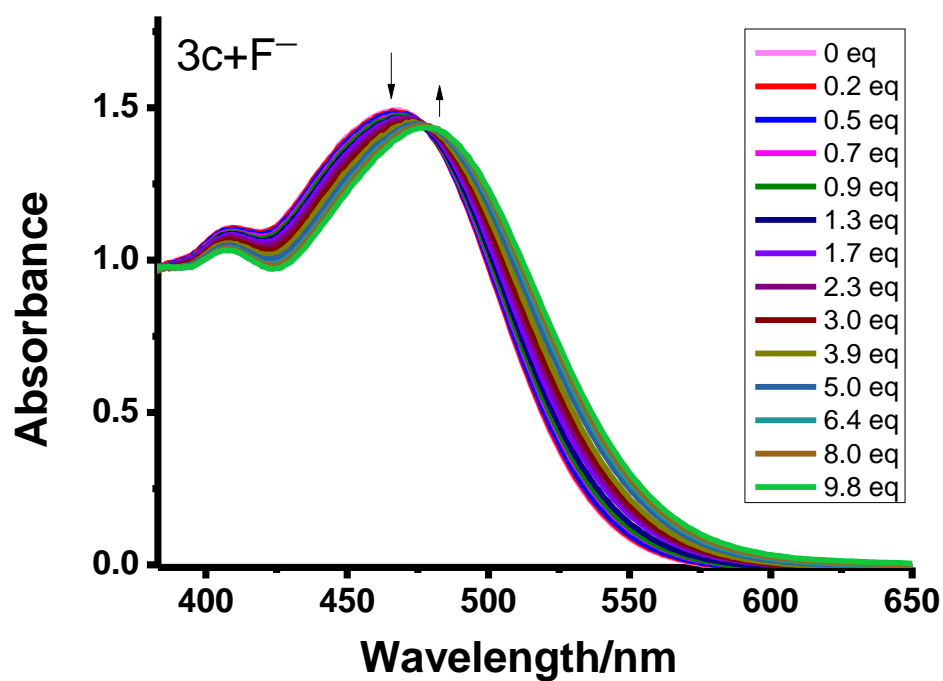

(b)

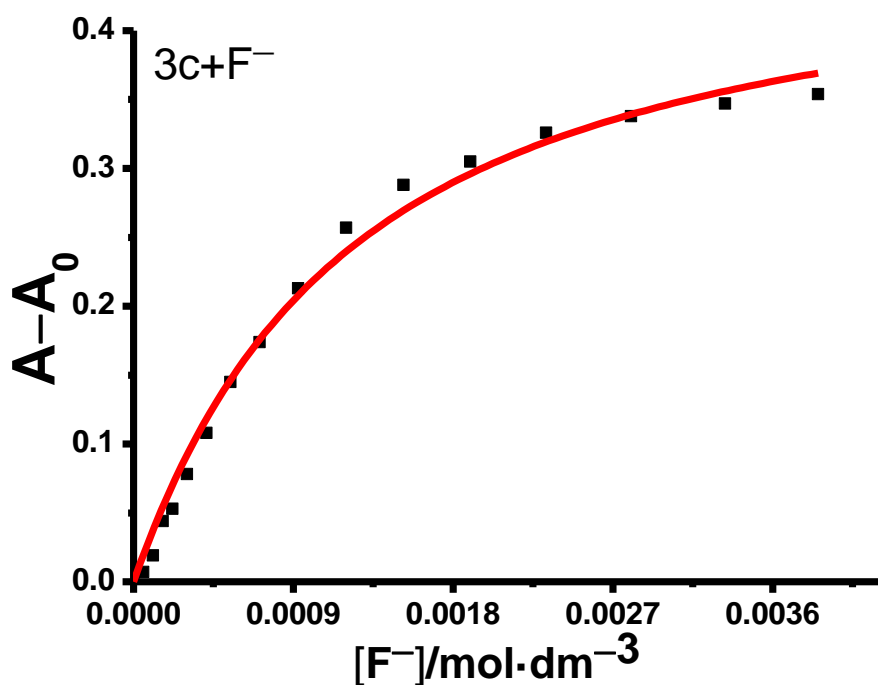

**Figure S36.** (a) UV-vis spectral changes of **3c** ( $2.38 \times 10^{-4}$  mol·dm<sup>-3</sup>) in DMSO upon addition of F<sup>-</sup>. (b) A plot of the absorbance change at 510 nm as a function of the concentration of F<sup>-</sup> and its theoretical fit for the 1:1 binding of complex **3c** with F<sup>-</sup>.

**Table S5** Binding constants (log *K*) of **3a–3d** with anions in DMSO<sup>a</sup>

| Complex   | F <sup>-</sup> | OAc <sup>-</sup> | Cl <sup>-</sup> | Br <sup>-</sup> | NO <sub>3</sub> <sup>-</sup> | HSO <sub>4</sub> <sup>-</sup> |
|-----------|----------------|------------------|-----------------|-----------------|------------------------------|-------------------------------|
| <b>3a</b> | 2.68±0.12      | 2.85±0.11        | <i>b</i>        | <i>b</i>        | <i>b</i>                     | <i>b</i>                      |
| <b>3b</b> | 2.94±0.09      | 3.25±0.11        | <i>b</i>        | <i>b</i>        | <i>b</i>                     | <i>b</i>                      |
| <b>3c</b> | 2.97±0.10      | 3.38±0.16        | <i>b</i>        | <i>b</i>        | <i>b</i>                     | <i>b</i>                      |
| <b>3d</b> | <i>c</i>       | 3.87±0.06        | <i>b</i>        | <i>b</i>        | <i>b</i>                     | <i>b</i>                      |

<sup>a</sup>Binding constants were determined by 1:1 model using nonlinear fitting methods. <sup>b</sup>Spectral changes were not suitable for accurate measurement of binding constant. <sup>c</sup>Deprotonation occurred.

(a)

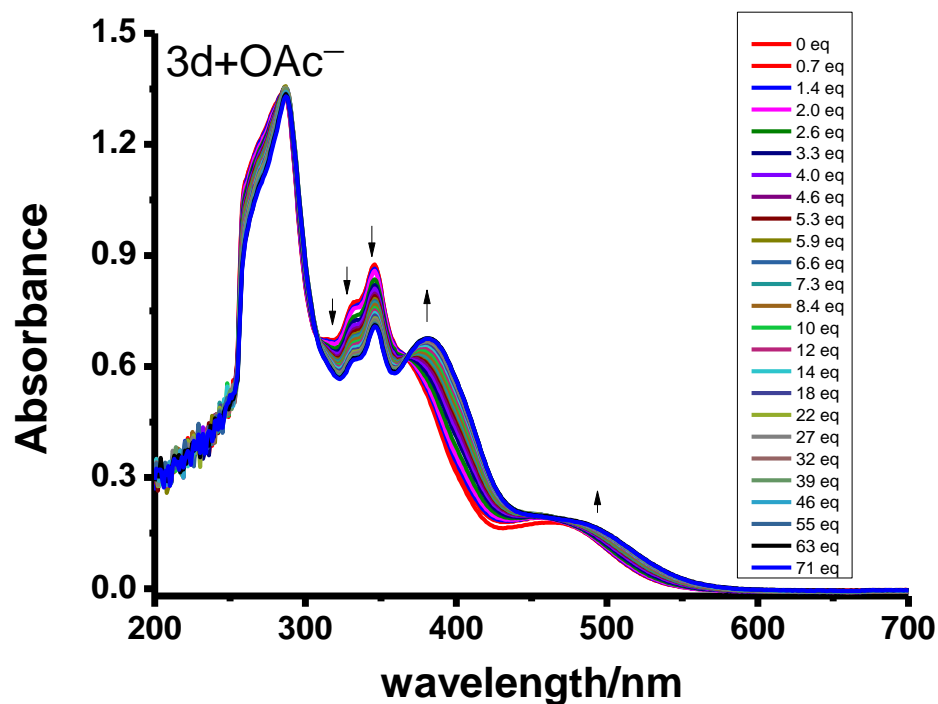

(b)

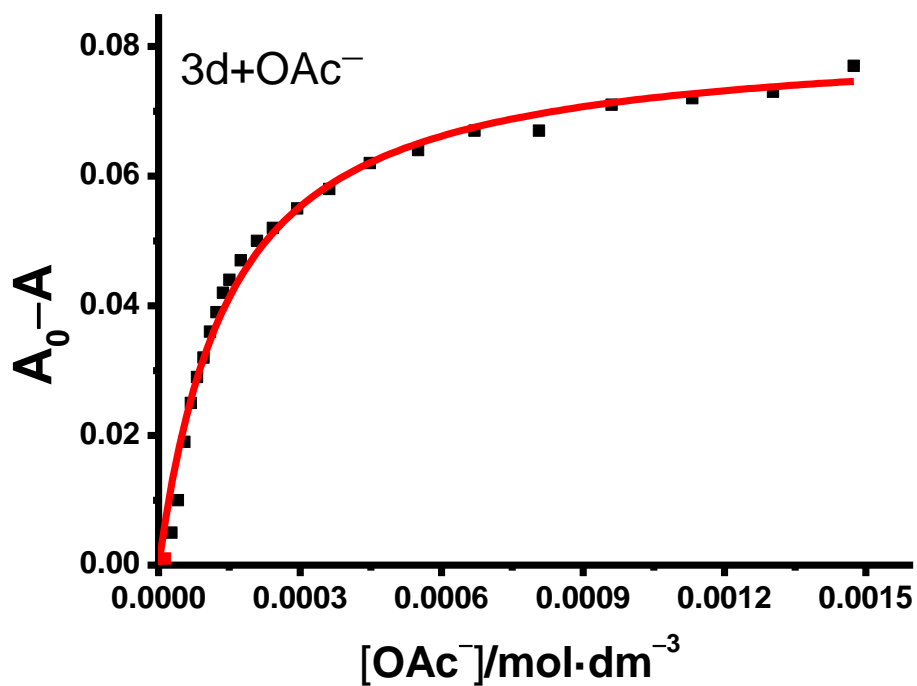

**Figure S37.** (a) UV-vis spectral changes of **3d** ( $2.1 \times 10^{-5} \text{ mol}\cdot\text{dm}^{-3}$ ) in DMSO upon addition of  $\text{OAc}^-$ . (b) A plot of the absorbance change at 316 nm as a function of the concentration of  $\text{OAc}^-$  and its theoretical fit for the 1:1 binding of complex **3d** with  $\text{OAc}^-$ .



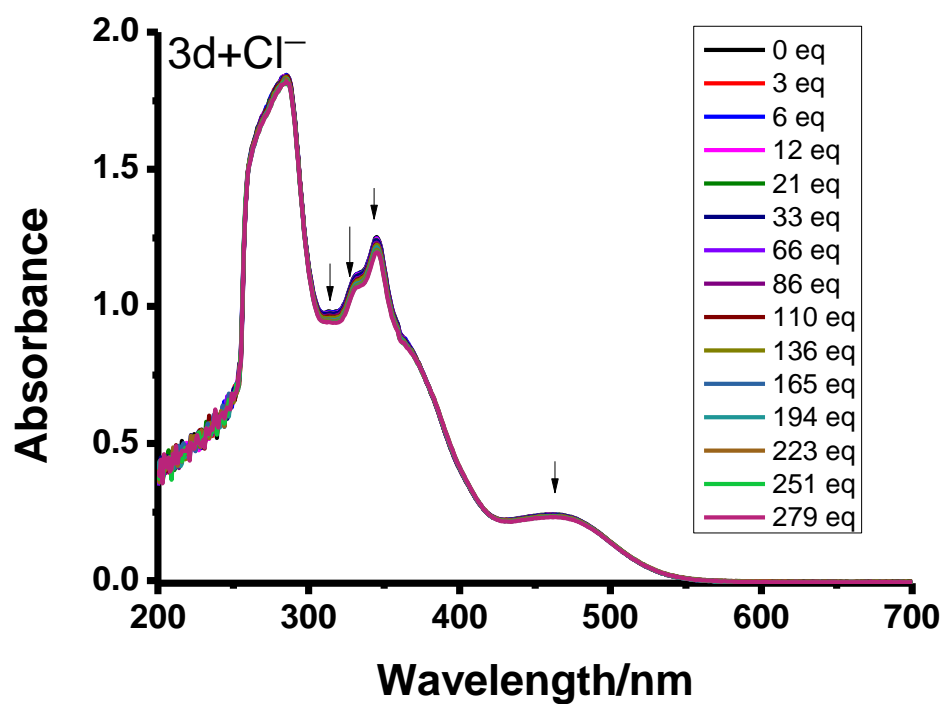

Figure S38. UV-vis spectral changes of **3d** ( $2.81 \times 10^{-4} \text{ mol}\cdot\text{dm}^{-3}$ ) in DMSO upon addition of Cl<sup>-</sup>.

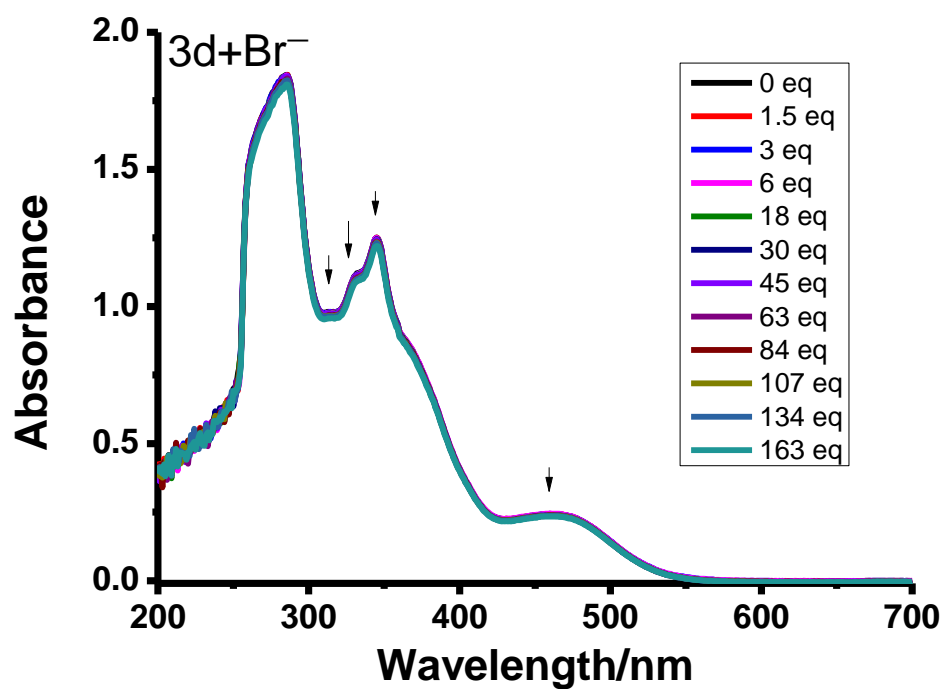

Figure S39. UV-vis spectral changes of **3d** ( $2.81 \times 10^{-4} \text{ mol}\cdot\text{dm}^{-3}$ ) in DMSO upon addition of Br<sup>-</sup>.

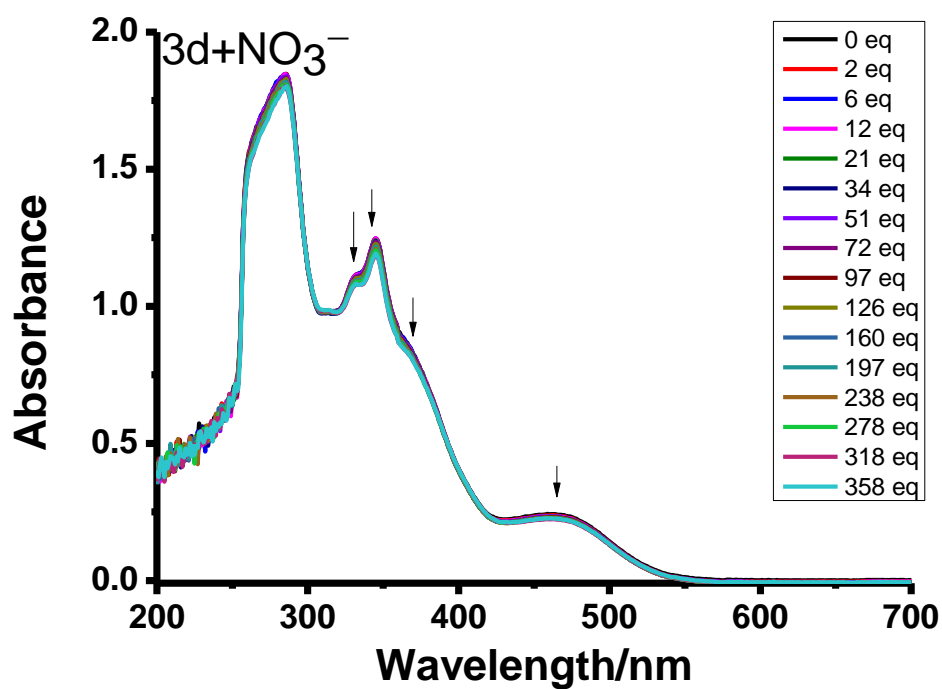

**Figure S40.** UV-vis spectral changes of **3d** ( $2.81 \times 10^{-4} \text{ mol}\cdot\text{dm}^{-3}$ ) in DMSO upon addition of  $\text{NO}_3^-$ .

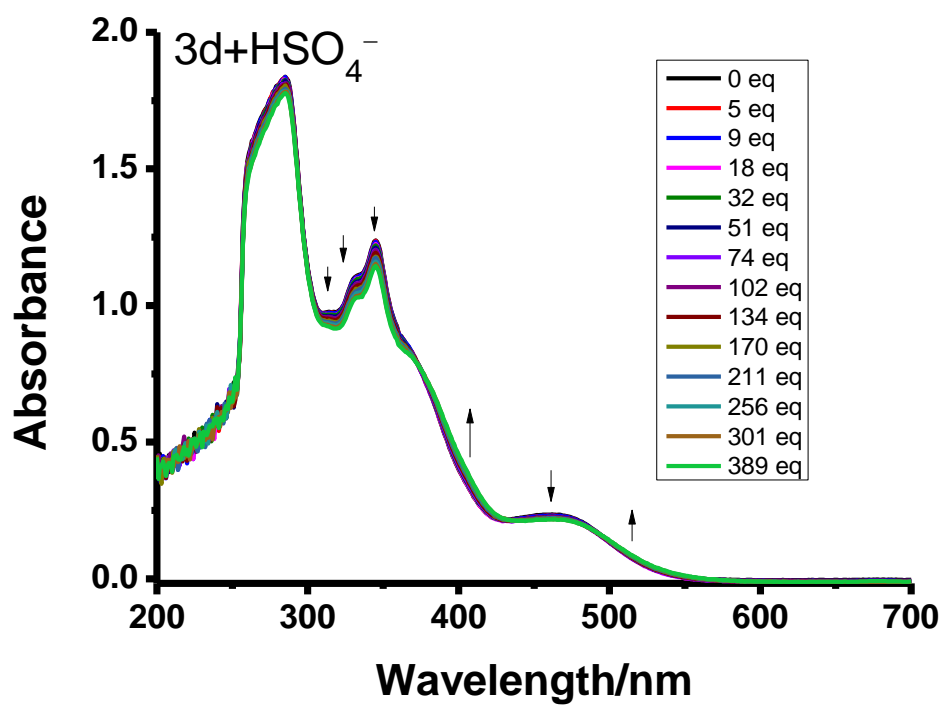

**Figure S41.** UV-vis spectral changes of **3d** ( $2.81 \times 10^{-4} \text{ mol}\cdot\text{dm}^{-3}$ ) in DMSO upon addition of  $\text{HSO}_4^-$ .

(a)

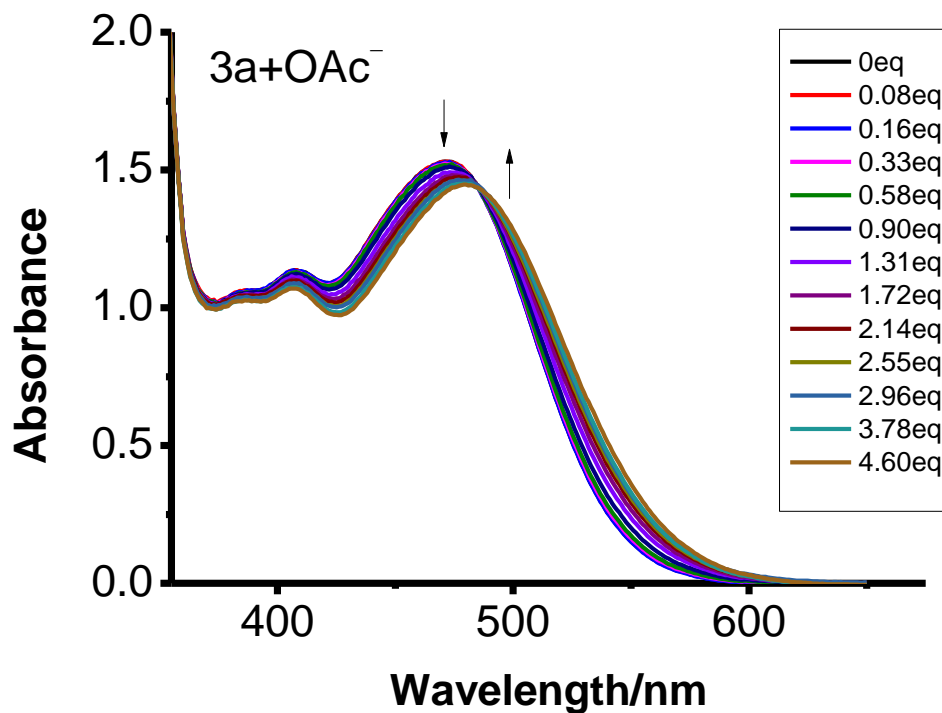

(b)

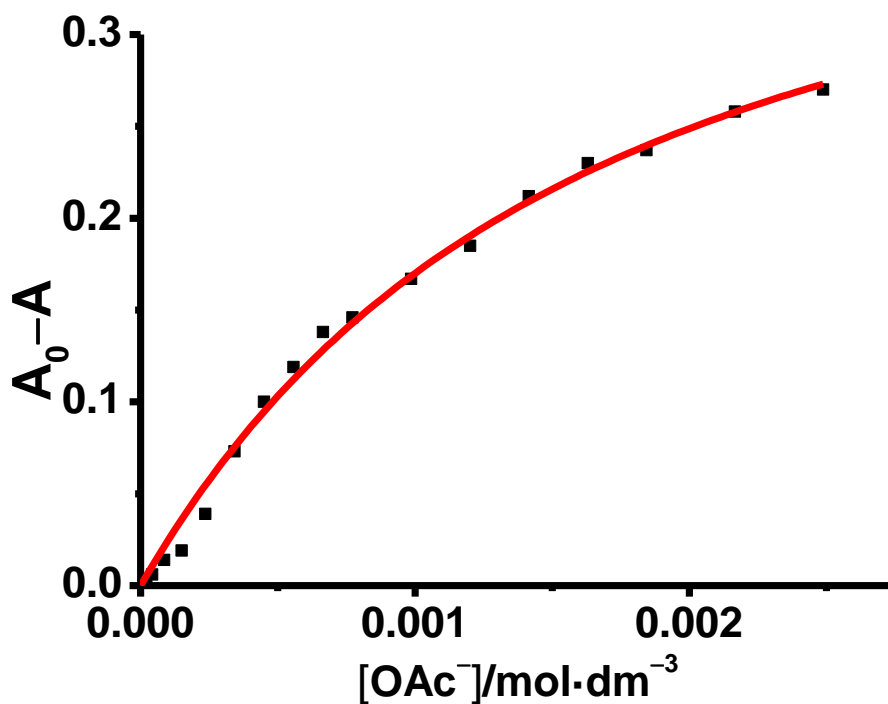

**Figure S42.** (a) UV-vis spectral changes of **3a** ( $3 \times 10^{-4} \text{ mol}\cdot\text{dm}^{-3}$ ) in DMSO upon addition of  $\text{OAc}^-$ . (b) A plot of the absorbance change at 440 nm as a function of the concentration of  $\text{OAc}^-$  and its theoretical fit for the 1:1 binding of complex **3a** with  $\text{OAc}^-$ .

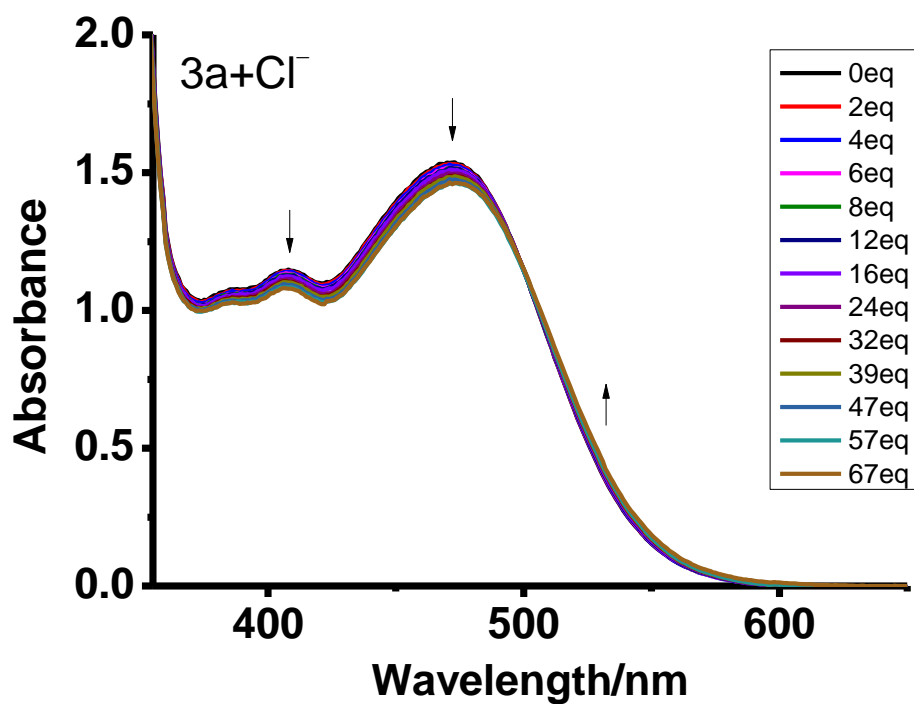

Figure S43. UV-vis spectral changes of 3a ( $3 \times 10^{-4}$  mol·dm<sup>-3</sup>) in DMSO upon addition of Cl<sup>-</sup>.

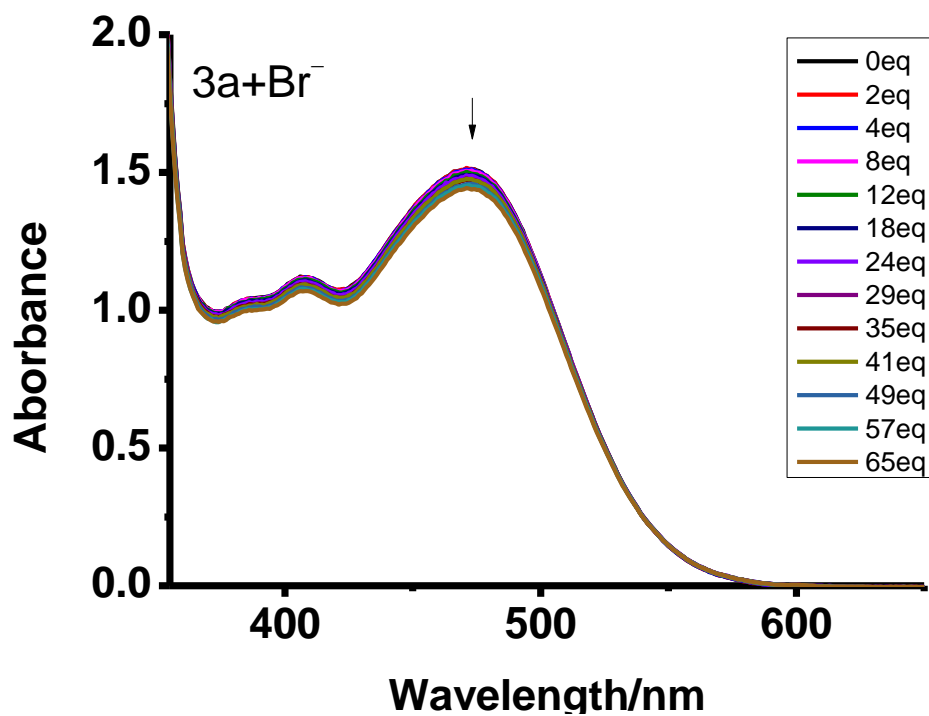

Figure S44. UV-vis spectral changes of 3a ( $3 \times 10^{-4}$  mol·dm<sup>-3</sup>) in DMSO upon addition of Br<sup>-</sup>.

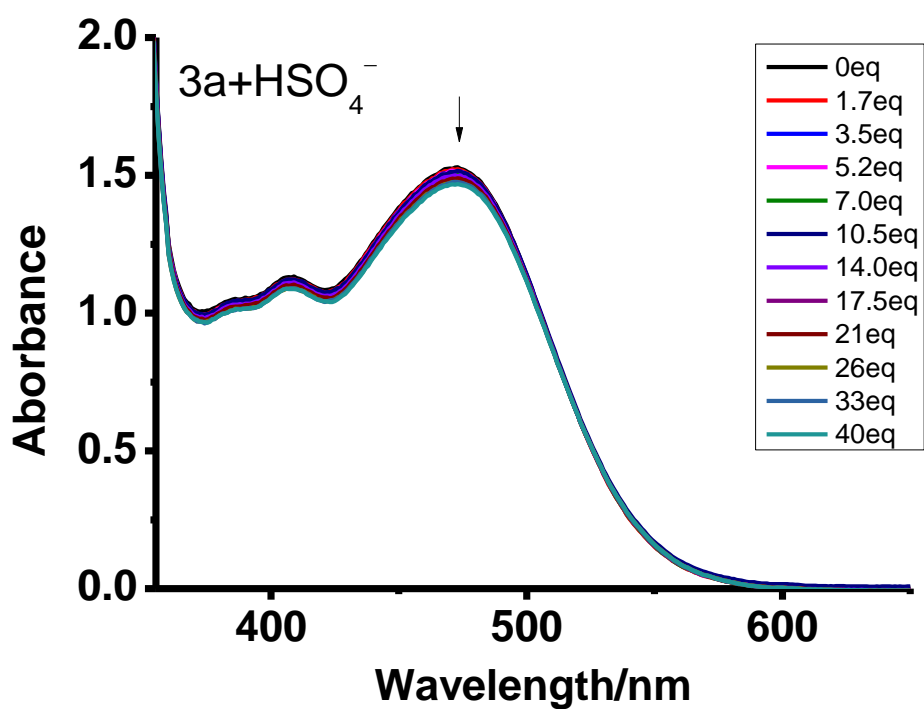

Figure S45. UV-vis spectral changes of **3a** ( $3 \times 10^{-4} \text{ mol}\cdot\text{dm}^{-3}$ ) in DMSO upon addition of  $\text{HSO}_4^-$ .

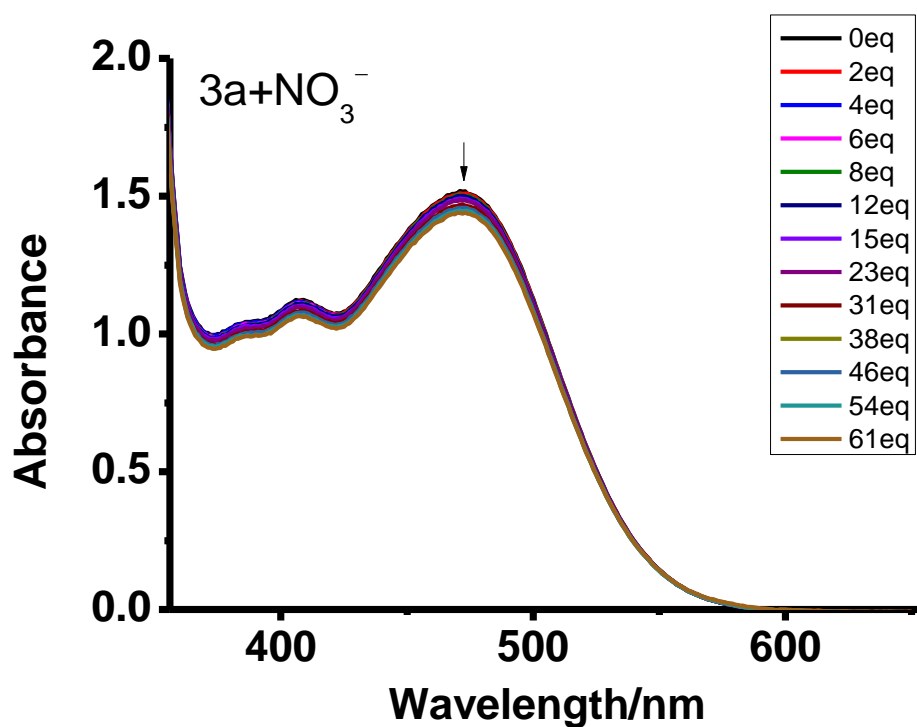

Figure S46. UV-vis spectral changes of **3a** ( $3 \times 10^{-4} \text{ mol}\cdot\text{dm}^{-3}$ ) in DMSO upon addition of  $\text{NO}_3^-$ .

(a)

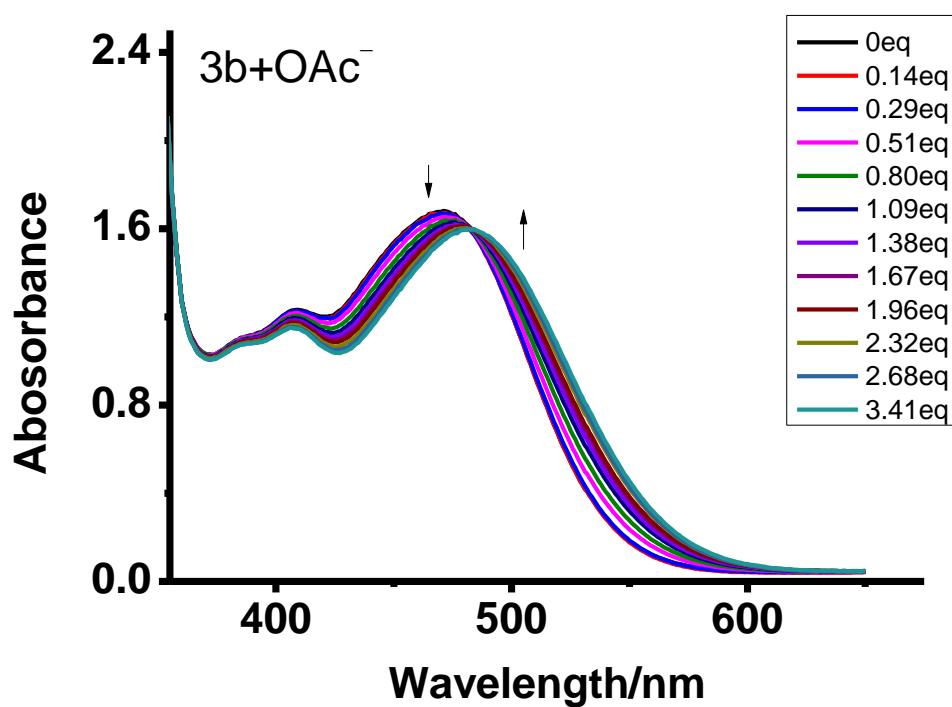

(b)

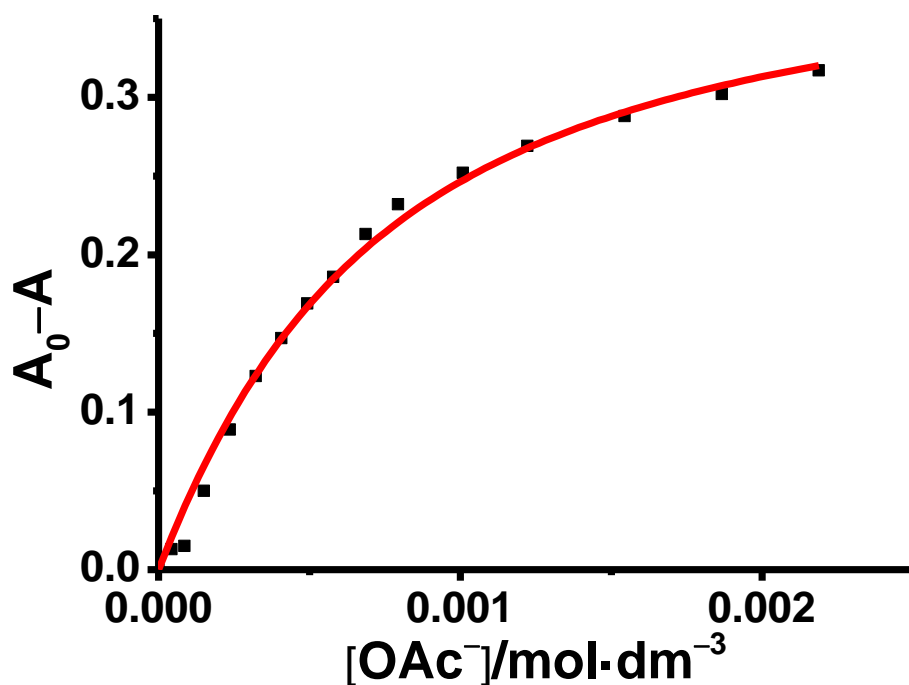

**Figure S47.** (a) UV-vis spectral changes of **3b** ( $2.76 \times 10^{-4} \text{ mol}\cdot\text{dm}^{-3}$ ) in DMSO upon addition of  $\text{OAc}^-$ . (b) A plot of the absorbance change at 449 nm as a function of the concentration of  $\text{OAc}^-$  and its theoretical fit for the 1:1 binding of complex **3b** with  $\text{OAc}^-$ .

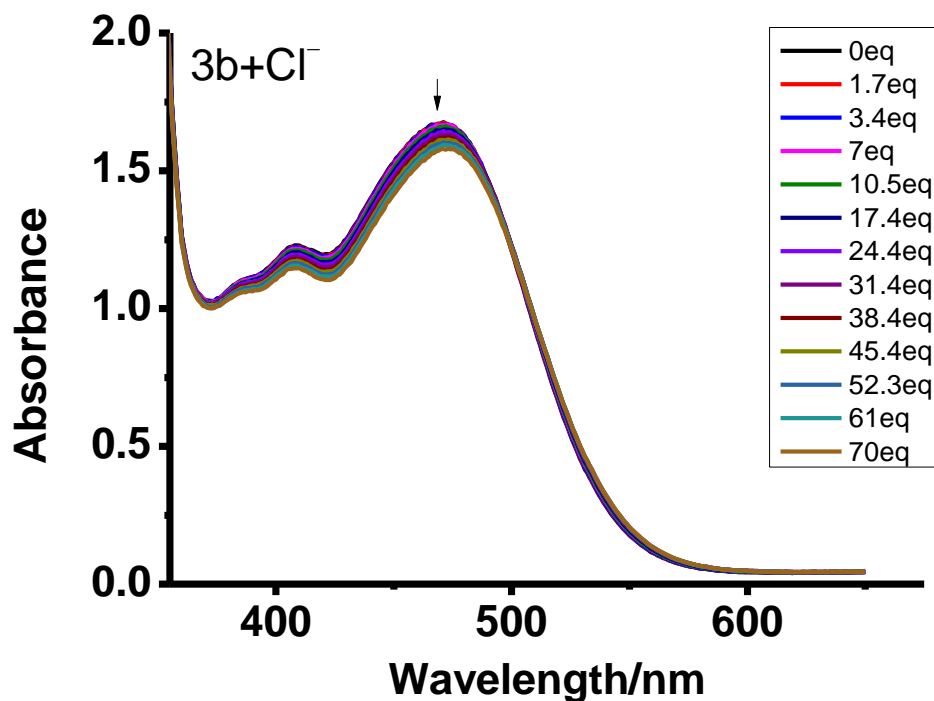

Figure S48. UV-vis spectral changes of **3b** ( $2.76 \times 10^{-4} \text{ mol}\cdot\text{dm}^{-3}$ ) in DMSO upon addition of  $\text{Cl}^-$ .

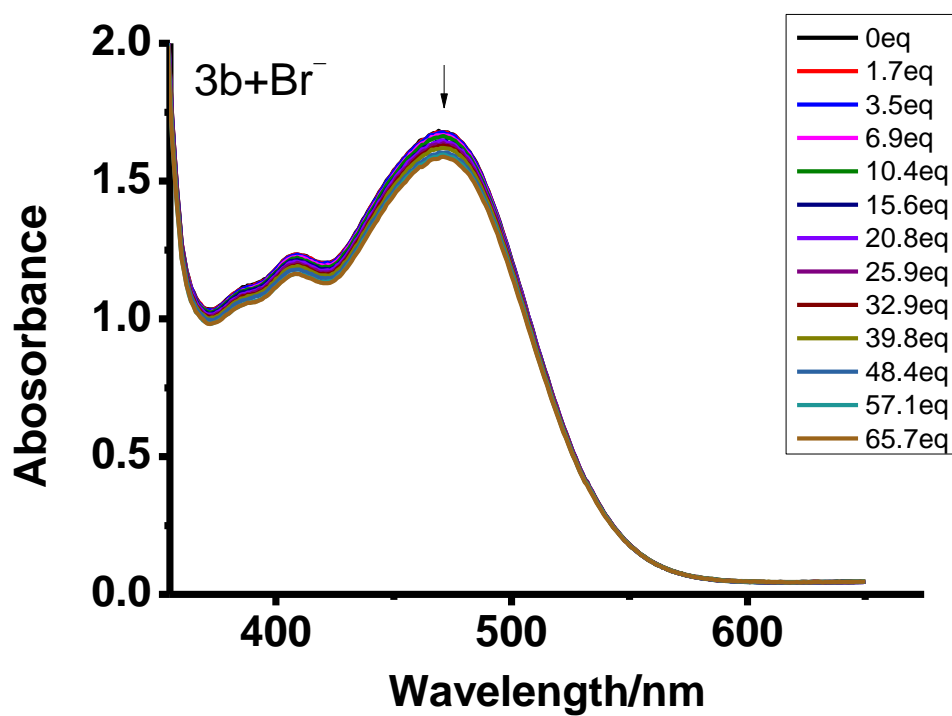

Figure S49. UV-vis spectral changes of **3b** ( $2.76 \times 10^{-4} \text{ mol}\cdot\text{dm}^{-3}$ ) in DMSO upon addition of  $\text{Br}^-$ .

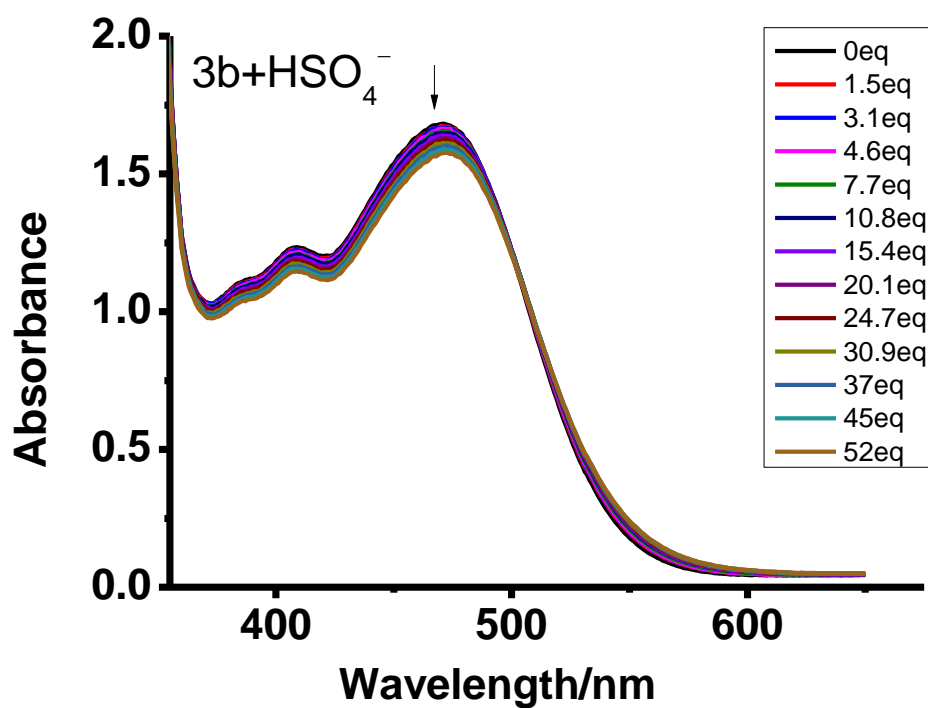

Figure S50. UV-vis spectral changes of **3b** ( $2.76 \times 10^{-4} \text{ mol}\cdot\text{dm}^{-3}$ ) in DMSO upon addition of  $\text{HSO}_4^-$ .

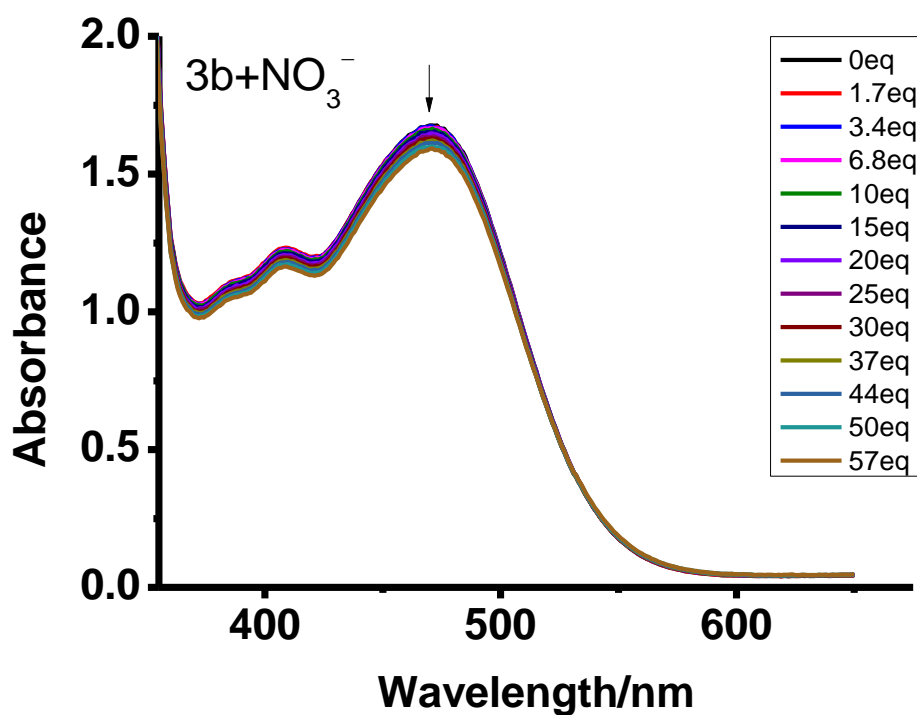

Figure S51. UV-vis spectral changes of **3b** ( $2.76 \times 10^{-4} \text{ mol}\cdot\text{dm}^{-3}$ ) in DMSO upon addition of  $\text{NO}_3^-$ .



(a)

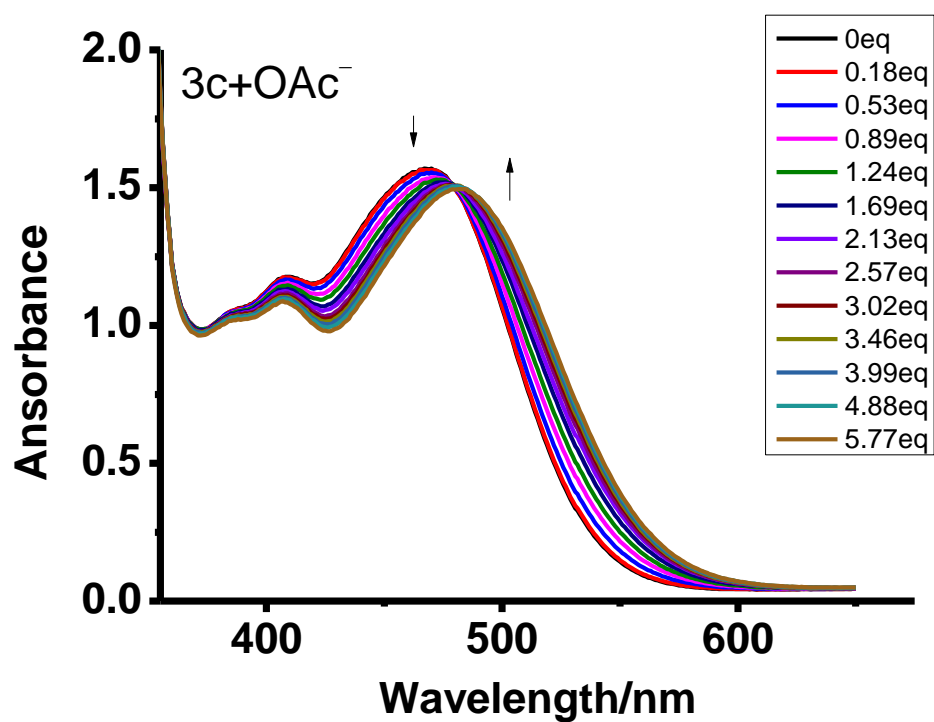

(b)

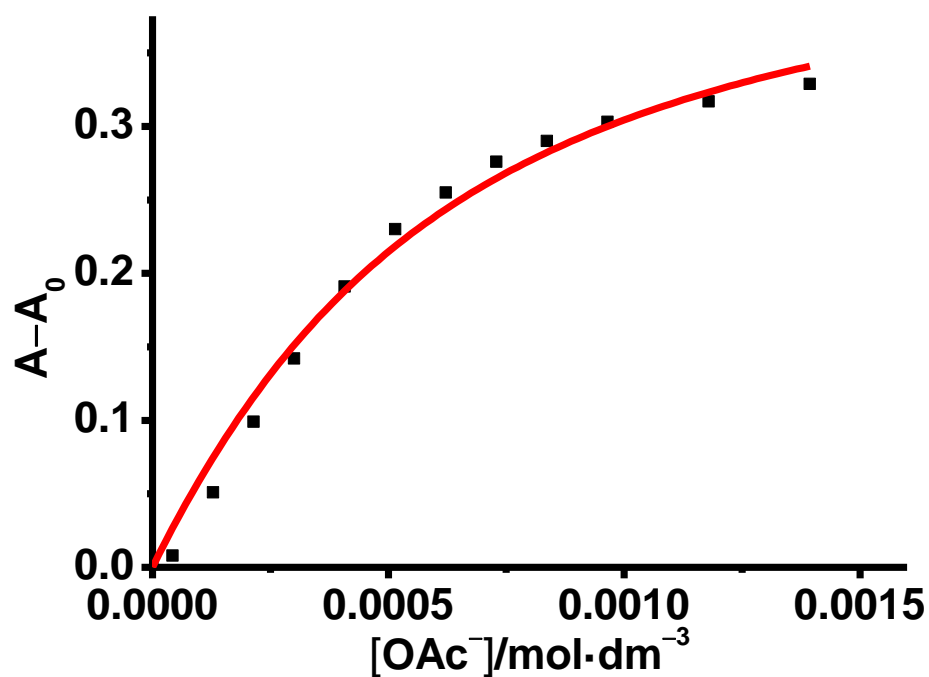

**Figure S52.** (a) UV-vis spectral changes of **3c** ( $2.38 \times 10^{-4} \text{ mol}\cdot\text{dm}^{-3}$ ) in DMSO upon addition of  $\text{OAc}^-$ . (b) A plot of the absorbance change at 540 nm as a function of the concentration of  $\text{OAc}^-$  and its theoretical fit for the 1:1 binding of complex **3c** with  $\text{OAc}^-$ .

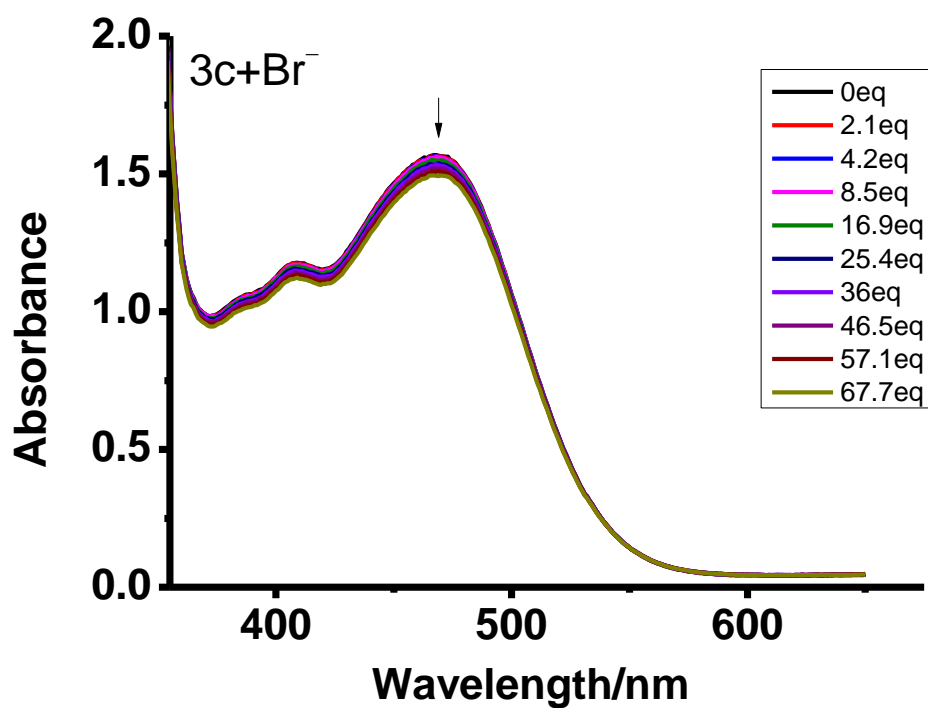

Figure S53. UV-vis spectral changes of **3c** ( $2.38 \times 10^{-4} \text{ mol}\cdot\text{dm}^{-3}$ ) in DMSO upon addition of  $\text{Br}^-$ .

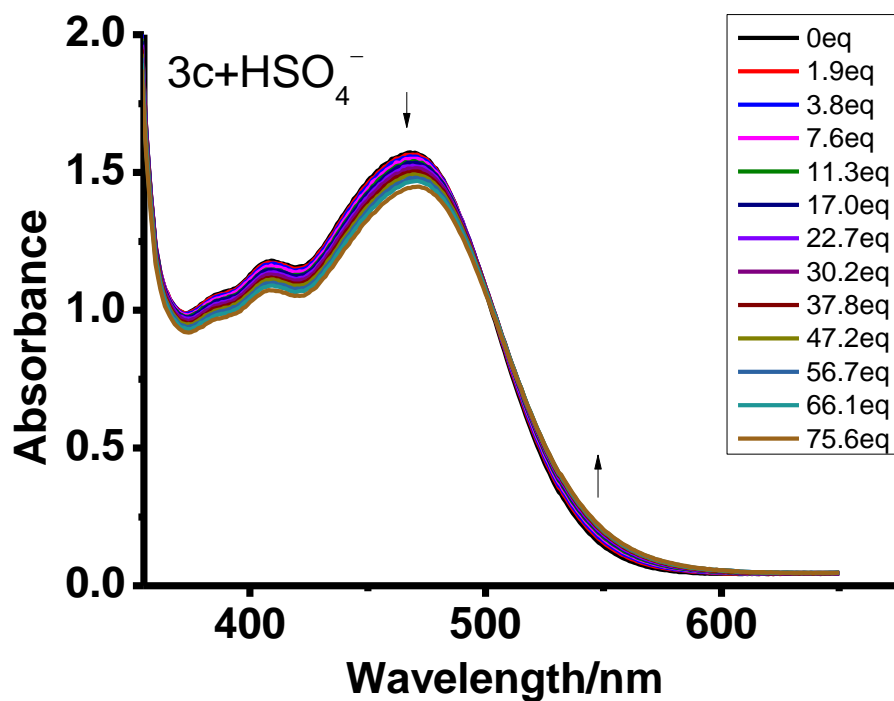

Figure S54. UV-vis spectral changes of **3c** ( $2.38 \times 10^{-4} \text{ mol}\cdot\text{dm}^{-3}$ ) in DMSO upon addition of  $\text{HSO}_4^-$ .

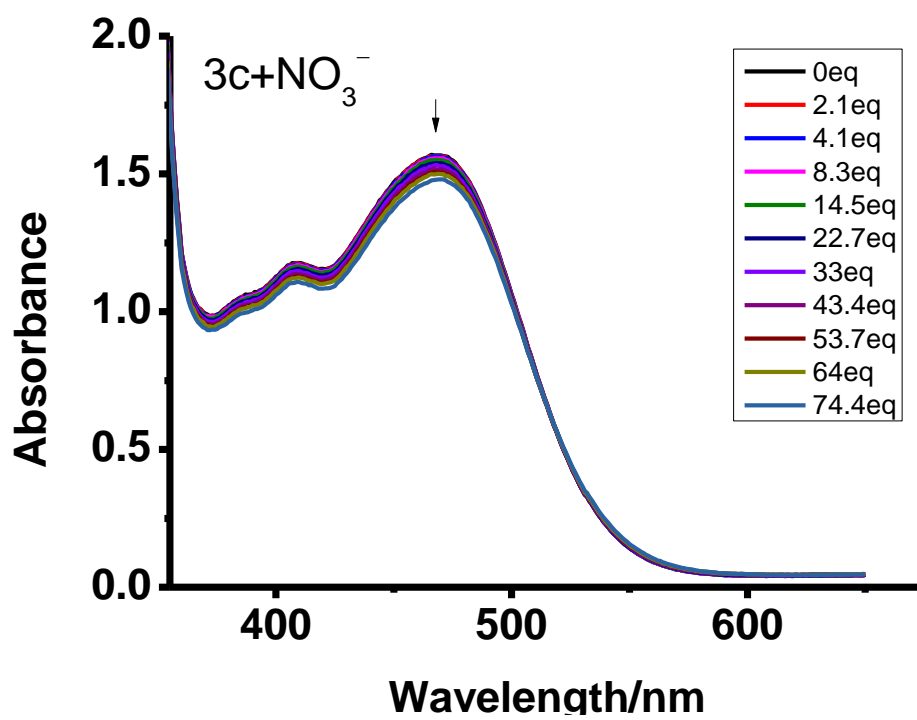

**Figure S55.** UV-vis spectral changes of **3c** ( $2.38 \times 10^{-4} \text{ mol}\cdot\text{dm}^{-3}$ ) in DMSO upon addition of  $\text{NO}_3^-$ .

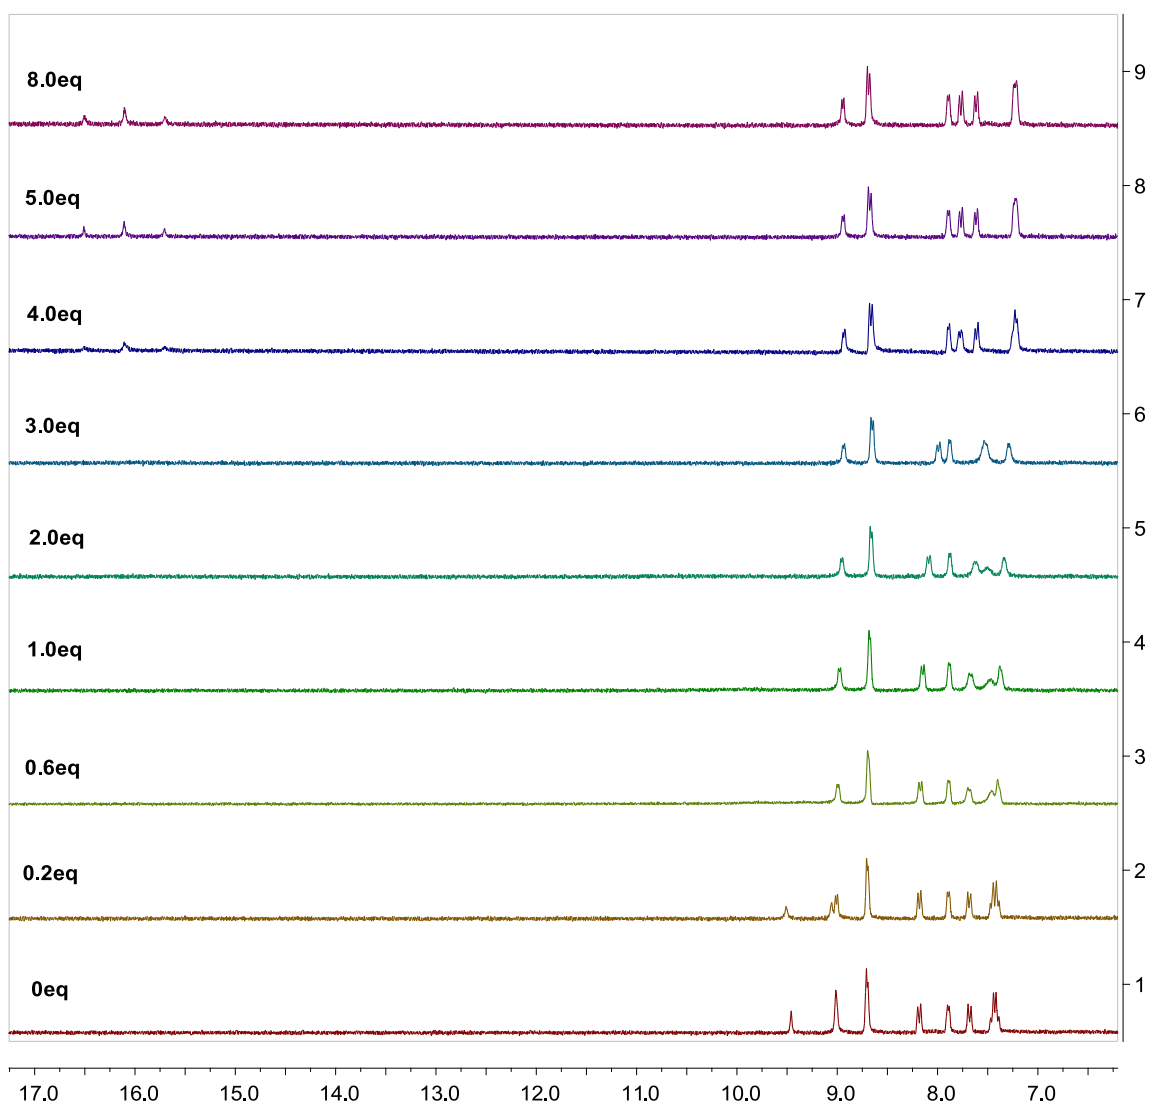

**Figure S56.**  $^1\text{H}$  NMR spectral changes of **3d** upon addition of  $\text{F}^-$  in  $\text{DMSO-}d_6$  at 6.25–17.25 ppm

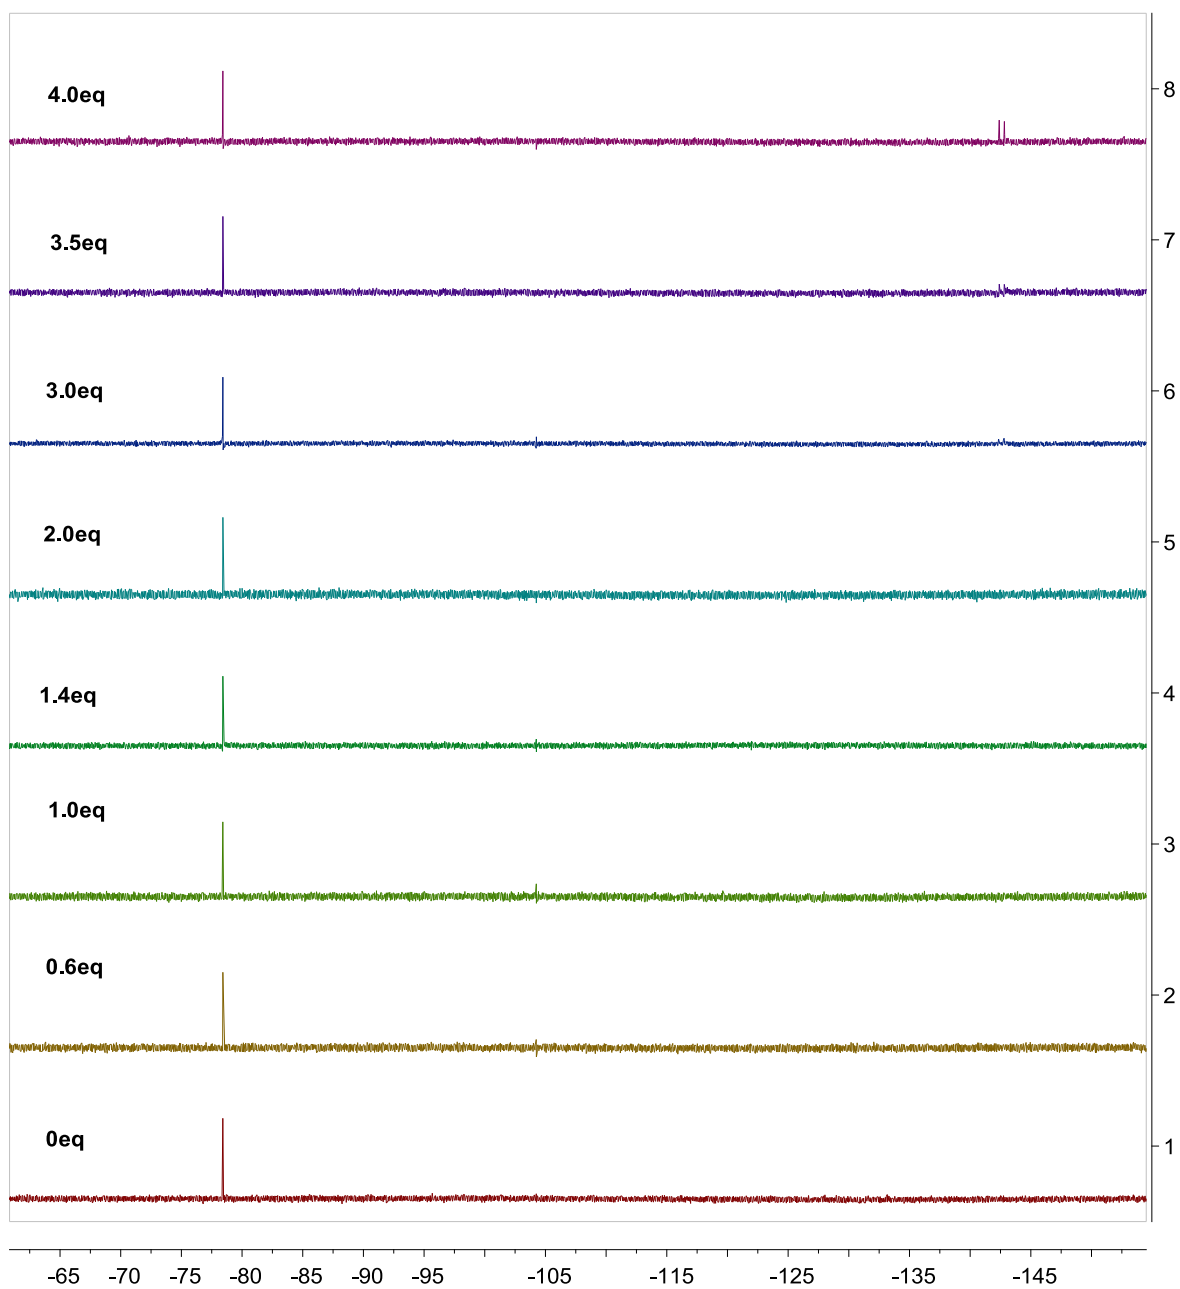

**Figure S57.**  $^{19}\text{F}$  NMR spectral changes of **3d** upon addition of  $\text{F}^-$  in  $\text{DMSO-}d_6$ . The singlet at  $-78.42$  ppm comes from the triflate anion.
